# Supplementary material for: Sexual dimorphism in mud crabs: a tale of three sympatric Scylla species
Source: PeerJ. 2021 Apr 12;9:e10936. doi: 10.7717/peerj.10936 (PMC8048398; doi:10.7717/peerj.10936)
Supplement: Data S1 [file peerj-09-10936-s001.xlsx]

## Sheet: Title page
Title:	Sexual dimorphism in mud crabs: A tale of three sympatric Scylla species
Authors:	Hanafiah Fazhana,b,d, Khor Waihoa*, Yushinta Fujayac, Nita Rukminasaric, Hongyu Mab,d, Mhd Ikhwanuddina,b*
Affiliations:	aHigher Institution Centre of Excellence (HICoE), Institute of Tropical Aquaculture and Fisheries, Universiti Malaysia Terengganu, 21030 Kuala Terengganu, Terengganu, Malaysia
	bSTU-UMT Joint Shellfish Research Laboratory, Shantou University, Shantou 515063, Guangdong, China
	cFaculty of Marine Science and Fishery, Hasanuddin University, Makassar, 90245, Indonesia
	dGuangdong Provincial Key Laboratory of Marine Biotechnology, Shantou University, Shantou 515063, Guangdong, China

## Sheet: Sheet1
CW	ICW	8CW	CL	AW	DL	PD	PL	ML	PW	sex	species
95.03	90.12	96.9	70.35	26.12	38.22	33.44	79.85	45.31	22.54	Male	S. olivacea
95.03	90.5	96.91	68.39	25.39	37.16	32.51	77.62	44.04	21.91	Male	S. olivacea
95.08	89.66	96.97	69.12	25.66	37.55	32.85	78.45	44.51	22.15	Male	S. olivacea
95.11	88.83	96.98	70.7	26.25	38.42	33.61	80.25	45.54	22.65	Male	S. olivacea
95.12	89.4	96.99	71.36	26.49	38.77	33.92	81	45.96	22.86	Male	S. olivacea
95.53	90.23	97.2	71.85	26.67	39.04	34.15	81.55	46.27	23.02	Male	S. olivacea
95.56	89.6	97.25	69.56	25.83	37.8	33.06	78.96	44.8	22.29	Male	S. olivacea
95.61	89.64	97.32	68.3	25.36	37.11	32.46	77.52	43.99	21.88	Male	S. olivacea
95.67	90.7	96.39	68.93	25.59	37.45	32.76	78.24	44.39	22.09	Male	S. olivacea
95.7	89.75	96.41	70.34	26.11	38.22	33.43	79.84	45.3	22.54	Male	S. olivacea
95.71	91.07	95.47	68.69	25.5	37.32	32.65	77.97	44.24	22.01	Male	S. olivacea
95.73	90.94	96.43	67.71	25.14	36.79	32.18	76.85	43.61	21.69	Male	S. olivacea
95.74	91.18	96.49	67.85	25.19	36.87	32.25	77.02	43.7	21.74	Male	S. olivacea
95.89	89.79	96.64	70.33	26.11	38.21	33.43	79.83	45.29	22.53	Male	S. olivacea
95.97	91.21	96.71	72.64	26.97	39.47	34.53	82.46	46.79	23.28	Male	S. olivacea
95.98	89.36	96.86	69.38	25.76	37.7	32.98	78.75	44.69	22.23	Male	S. olivacea
96	89.7	96.87	71.07	26.39	38.61	33.78	80.67	45.77	22.77	Male	S. olivacea
96.08	91.06	96.96	68.76	25.53	37.36	32.68	78.05	44.29	22.03	Male	S. olivacea
96.1	89.4	96.96	68.11	25.29	37.01	32.37	77.3	43.86	21.82	Male	S. olivacea
96.16	91.56	96.97	68.32	25.37	37.12	32.47	77.55	44	21.89	Male	S. olivacea
96.17	91.2	96.98	70.88	26.32	38.51	33.69	80.45	45.65	22.71	Male	S. olivacea
96.19	89.74	97.09	72.15	26.79	39.21	34.3	81.9	46.47	23.12	Male	S. olivacea
96.36	90.86	96.26	67.64	25.11	36.75	32.15	76.78	43.57	21.67	Male	S. olivacea
96.45	91.52	98.2	71.67	26.61	38.94	34.06	81.35	46.16	22.96	Male	S. olivacea
96.46	91.62	98.22	68.66	25.49	37.31	32.63	77.93	44.22	22	Male	S. olivacea
96.6	91.61	98.49	67.72	25.14	36.79	32.19	76.86	43.61	21.7	Male	S. olivacea
96.65	92.04	98.5	67.65	25.12	36.76	32.16	76.79	43.57	21.68	Male	S. olivacea
96.69	90.32	98.58	70.86	26.31	38.5	33.68	80.43	45.64	22.7	Male	S. olivacea
96.79	91.69	98.64	71.25	26.45	38.72	33.87	80.88	45.89	22.83	Male	S. olivacea
96.81	91.67	98.66	70.49	26.17	38.3	33.5	80.01	45.4	22.59	Male	S. olivacea
96.86	91.96	98.67	69.32	25.74	37.66	32.95	78.68	44.64	22.21	Male	S. olivacea
97	90.72	98.9	68.96	25.6	37.47	32.78	78.28	44.41	22.1	Male	S. olivacea
97.07	90.67	98.98	71.01	26.36	38.58	33.75	80.6	45.73	22.75	Male	S. olivacea
97.14	90.75	98.03	69.94	25.97	38	33.24	79.39	45.05	22.41	Male	S. olivacea
97.21	90.89	98.07	70.87	26.31	38.51	33.69	80.45	45.65	22.71	Male	S. olivacea
97.24	92.6	98.08	70.58	26.21	38.35	33.55	80.12	45.46	22.62	Male	S. olivacea
97.27	92.73	98.12	70.31	26.11	38.2	33.42	79.81	45.28	22.53	Male	S. olivacea
97.44	92.06	98.14	70.9	26.32	38.52	33.7	80.47	45.66	22.72	Male	S. olivacea
97.44	91.08	98.17	67.35	25	36.59	32.01	76.44	43.37	21.58	Male	S. olivacea
97.57	89.85	99.43	71.55	26.56	38.87	34.01	81.21	46.08	22.92	Male	S. olivacea
97.58	91.13	99.51	70.9	26.32	38.52	33.7	80.47	45.66	22.72	Male	S. olivacea
97.61	91.55	99.53	71.59	26.58	38.9	34.03	81.26	46.11	22.94	Male	S. olivacea
97.63	89.92	99.59	67.64	25.11	36.75	32.15	76.78	43.56	21.67	Male	S. olivacea
97.7	90.08	99.64	70.86	26.31	38.5	33.68	80.43	45.64	22.7	Male	S. olivacea
97.79	89.6	99.64	68.73	25.52	37.34	32.67	78.01	44.26	22.02	Male	S. olivacea
97.89	91.66	99.72	68.28	25.35	37.1	32.45	77.5	43.97	21.88	Male	S. olivacea
97.92	90.97	99.72	72.31	26.85	39.29	34.37	82.08	46.57	23.17	Male	S. olivacea
98.02	92.08	99.77	69.44	25.78	37.73	33	78.81	44.72	22.25	Male	S. olivacea
98.06	91.94	99.85	68.01	25.25	36.95	32.32	77.19	43.8	21.79	Male	S. olivacea
98.08	90.2	100.35	69.22	25.7	37.61	32.9	78.57	44.58	22.18	Male	S. olivacea
98.21	92.03	100.5	67.87	25.2	36.88	32.26	77.04	43.71	21.75	Male	S. olivacea
98.31	92.13	100.52	72.24	26.82	39.25	34.34	82	46.52	23.15	Male	S. olivacea
98.34	92.41	100.59	69.43	25.78	37.72	33	78.81	44.71	22.25	Male	S. olivacea
98.36	91.25	100.66	67.86	25.2	36.87	32.26	77.03	43.71	21.74	Male	S. olivacea
98.36	91.46	100.69	70.1	26.03	38.09	33.32	79.57	45.15	22.46	Male	S. olivacea
98.38	91.82	100.69	69.45	25.78	37.73	33.01	78.83	44.73	22.25	Male	S. olivacea
98.41	91.9	100.73	70.04	26	38.06	33.29	79.5	45.11	22.44	Male	S. olivacea
98.46	91.03	100.87	68.88	25.57	37.43	32.74	78.19	44.36	22.07	Male	S. olivacea
98.47	91.8	100.93	67.94	25.22	36.91	32.29	77.11	43.75	21.77	Male	S. olivacea
98.51	91.9	100.94	68.79	25.54	37.38	32.7	78.08	44.3	22.04	Male	S. olivacea
98.54	91.38	101	70.96	26.35	38.56	33.73	80.54	45.7	22.74	Male	S. olivacea
98.66	92.16	101.16	70.5	26.18	38.31	33.51	80.03	45.41	22.59	Male	S. olivacea
98.69	91.36	101.18	72.33	26.85	39.3	34.38	82.1	46.58	23.18	Male	S. olivacea
98.72	92.2	101.19	69.48	25.8	37.75	33.03	78.87	44.75	22.26	Male	S. olivacea
98.75	90.61	101.23	71.98	26.72	39.11	34.21	81.7	46.35	23.06	Male	S. olivacea
98.9	92.06	102.07	68.83	25.56	37.4	32.72	78.13	44.33	22.06	Male	S. olivacea
98.92	91.36	102.08	67.34	25	36.59	32	76.43	43.37	21.58	Male	S. olivacea
98.95	91.59	102.09	68.14	25.3	37.02	32.39	77.34	43.88	21.83	Male	S. olivacea
98.99	91.15	100.2	72.64	26.97	39.47	34.53	82.45	46.78	23.27	Male	S. olivacea
99.01	92.56	100.23	70.84	26.3	38.49	33.67	80.4	45.62	22.7	Male	S. olivacea
99.05	92.55	100.31	68.15	25.3	37.03	32.39	77.36	43.89	21.84	Male	S. olivacea
99.09	93.12	100.36	67.75	25.15	36.81	32.2	76.9	43.63	21.71	Male	S. olivacea
99.15	91.66	100.36	71.96	26.72	39.1	34.2	81.68	46.34	23.06	Male	S. olivacea
99.18	91.54	102.58	67.75	25.15	36.81	32.2	76.9	43.63	21.71	Male	S. olivacea
99.35	91.53	101.4	67.56	25.08	36.71	32.11	76.69	43.51	21.65	Male	S. olivacea
99.36	91.99	102.71	71.62	26.59	38.92	34.04	81.29	46.13	22.95	Male	S. olivacea
99.79	92.2	98.93	71.76	26.64	38.99	34.11	81.46	46.22	22.99	Male	S. olivacea
99.83	92.74	98.94	69.29	25.73	37.65	32.93	78.65	44.63	22.2	Male	S. olivacea
99.83	92.91	98.96	67.62	25.11	36.74	32.14	76.75	43.55	21.67	Male	S. olivacea
103.01	95.36	105.1	73.66	27.35	40.02	35.01	83.61	47.44	23.6	Male	S. olivacea
103.01	95.68	105.19	78.41	29.11	42.6	37.27	89	50.5	25.12	Male	S. olivacea
103.02	96.33	105.3	78.01	28.96	42.39	37.08	88.55	50.24	25	Male	S. olivacea
103.15	96.83	105.57	72.92	27.07	39.62	34.66	82.77	46.97	23.37	Male	S. olivacea
103.25	96.2	105.72	75.93	28.19	41.26	36.09	86.19	48.9	24.33	Male	S. olivacea
103.36	95.4	105.72	74.34	27.6	40.39	35.33	84.38	47.88	23.82	Male	S. olivacea
103.43	95.55	105.95	75.48	28.02	41.01	35.87	85.67	48.61	24.18	Male	S. olivacea
103.56	96.8	106	77.13	28.63	41.91	36.66	87.54	49.67	24.71	Male	S. olivacea
103.97	97.01	106.23	77.22	28.67	41.96	36.7	87.65	49.73	24.74	Male	S. olivacea
104.06	95.9	106.23	79.66	29.57	43.28	37.86	90.42	51.3	25.52	Male	S. olivacea
104.1	96.58	106.25	73.18	27.17	39.76	34.78	83.07	47.13	23.45	Male	S. olivacea
104.45	97.57	105.3	76.44	28.38	41.53	36.33	86.76	49.23	24.49	Male	S. olivacea
104.48	96.9	105.5	80.9	30.04	43.96	38.45	91.83	52.1	25.92	Male	S. olivacea
104.59	96.76	105.51	74.06	27.49	40.24	35.2	84.06	47.69	23.73	Male	S. olivacea
104.59	97.83	105.69	76.18	28.28	41.39	36.21	86.47	49.06	24.41	Male	S. olivacea
104.92	96.76	105.71	73.36	27.24	39.86	34.87	83.27	47.25	23.51	Male	S. olivacea
104.95	97.3	105.76	75.75	28.13	41.16	36.01	85.99	48.79	24.27	Male	S. olivacea
104.99	98.37	105.76	73.18	27.17	39.76	34.78	83.07	47.13	23.45	Male	S. olivacea
105.03	98.83	105.83	76.95	28.57	41.81	36.58	87.35	49.56	24.66	Male	S. olivacea
105.06	98.43	105.86	75.23	27.93	40.88	35.76	85.39	48.45	24.11	Male	S. olivacea
105.38	98.86	105.86	72.94	27.08	39.63	34.67	82.79	46.97	23.37	Male	S. olivacea
105.46	99.05	106.04	79.23	29.42	43.05	37.66	89.93	51.03	25.39	Male	S. olivacea
105.47	98.72	106.13	79.66	29.58	43.28	37.86	90.42	51.3	25.52	Male	S. olivacea
105.56	97.9	106.4	79.2	29.4	43.03	37.64	89.9	51.01	25.38	Male	S. olivacea
105.66	97.62	106.42	74.69	27.73	40.58	35.5	84.78	48.11	23.93	Male	S. olivacea
105.68	97.79	106.43	78.69	29.21	42.75	37.4	89.31	50.68	25.21	Male	S. olivacea
105.72	98.97	106.68	79.93	29.68	43.43	37.99	90.73	51.48	25.61	Male	S. olivacea
105.82	98.2	106.72	80.34	29.83	43.65	38.19	91.19	51.74	25.74	Male	S. olivacea
105.85	98.02	106.81	75.89	28.18	41.24	36.07	86.14	48.88	24.32	Male	S. olivacea
106.1	98.88	106.96	76.61	28.44	41.62	36.41	86.95	49.34	24.55	Male	S. olivacea
106.13	99.37	106.99	77.73	28.86	42.23	36.95	88.23	50.06	24.91	Male	S. olivacea
106.15	98.22	105.97	77.23	28.67	41.96	36.71	87.66	49.74	24.75	Male	S. olivacea
106.38	100.43	106.02	78.53	29.16	42.67	37.33	89.14	50.58	25.16	Male	S. olivacea
106.44	100.28	106.09	75.41	28	40.98	35.84	85.6	48.57	24.16	Male	S. olivacea
106.48	99.74	106.3	74.02	27.48	40.22	35.18	84.02	47.67	23.72	Male	S. olivacea
106.51	99.23	106.45	77.53	28.79	42.13	36.85	88.01	49.93	24.84	Male	S. olivacea
106.76	100.3	106.49	79.47	29.51	43.18	37.77	90.21	51.18	25.46	Male	S. olivacea
106.78	99.69	106.49	80.47	29.88	43.72	38.25	91.34	51.83	25.78	Male	S. olivacea
106.88	99.54	106.6	76.34	28.34	41.48	36.28	86.65	49.16	24.46	Male	S. olivacea
106.92	98.39	106.72	76.79	28.51	41.73	36.5	87.16	49.46	24.61	Male	S. olivacea
106.96	99.96	106.86	76.01	28.22	41.3	36.13	86.27	48.95	24.35	Male	S. olivacea
106.97	98.93	107.09	78.9	29.29	42.87	37.5	89.56	50.82	25.28	Male	S. olivacea
107.13	98.28	107.1	77.59	28.81	42.16	36.88	88.07	49.97	24.86	Male	S. olivacea
107.19	98.3	107.21	72.94	27.08	39.63	34.67	82.79	46.98	23.37	Male	S. olivacea
107.25	99.78	107.31	80.36	29.84	43.66	38.2	91.22	51.76	25.75	Male	S. olivacea
107.33	99.03	107.54	80.85	30.02	43.93	38.43	91.77	52.07	25.91	Male	S. olivacea
107.35	99.08	108.68	79.48	29.51	43.19	37.78	90.22	51.19	25.47	Male	S. olivacea
107.49	100.43	108.75	80.8	30	43.9	38.41	91.72	52.04	25.89	Male	S. olivacea
107.56	99.07	108.83	80.67	29.95	43.83	38.34	91.56	51.95	25.85	Male	S. olivacea
107.66	100.99	108.92	80.44	29.86	43.71	38.23	91.3	51.8	25.77	Male	S. olivacea
107.92	100.45	108.95	80.27	29.8	43.61	38.15	91.11	51.7	25.72	Male	S. olivacea
107.98	100.84	109.1	75.2	27.92	40.86	35.74	85.36	48.43	24.1	Male	S. olivacea
108.04	98.93	109.19	73.29	27.21	39.82	34.83	83.19	47.2	23.48	Male	S. olivacea
108.04	99.24	109.43	79.2	29.4	43.03	37.64	89.89	51.01	25.38	Male	S. olivacea
108.22	100.44	109.73	80.3	29.81	43.63	38.17	91.14	51.71	25.73	Male	S. olivacea
108.27	100.6	109.73	76.85	28.53	41.76	36.53	87.23	49.49	24.62	Male	S. olivacea
108.53	100.1	109.85	77.34	28.72	42.03	36.76	87.79	49.81	24.78	Male	S. olivacea
108.54	100.81	109.86	73.8	27.4	40.1	35.08	83.77	47.53	23.65	Male	S. olivacea
108.56	100.28	109.94	78.68	29.21	42.75	37.4	89.31	50.67	25.21	Male	S. olivacea
108.71	99.53	110.02	77.61	28.81	42.17	36.89	88.09	49.98	24.87	Male	S. olivacea
108.76	100.69	110.14	77.8	28.89	42.27	36.98	88.31	50.11	24.93	Male	S. olivacea
108.8	102.11	110.19	79.48	29.51	43.19	37.78	90.22	51.19	25.47	Male	S. olivacea
108.93	102	110.26	78.87	29.28	42.86	37.49	89.53	50.8	25.27	Male	S. olivacea
108.97	101.35	110.27	72.87	27.05	39.59	34.63	82.71	46.93	23.35	Male	S. olivacea
109.23	102.6	110.52	75.69	28.1	41.13	35.98	85.91	48.75	24.25	Male	S. olivacea
109.25	100.1	110.55	73.15	27.16	39.74	34.77	83.03	47.11	23.44	Male	S. olivacea
109.27	99.99	110.64	76.4	28.37	41.51	36.32	86.72	49.21	24.48	Male	S. olivacea
109.32	100.22	110.67	75.99	28.21	41.29	36.12	86.25	48.94	24.35	Male	S. olivacea
109.36	100.9	110.67	75.81	28.15	41.19	36.03	86.05	48.82	24.29	Male	S. olivacea
109.86	103.21	110.68	79.26	29.43	43.07	37.67	89.96	51.05	25.4	Male	S. olivacea
109.86	101.79	110.73	73.36	27.24	39.86	34.87	83.27	47.25	23.51	Male	S. olivacea
109.89	101.04	110.76	79.31	29.45	43.09	37.7	90.02	51.08	25.41	Male	S. olivacea
109.96	102.54	111.04	74.48	27.65	40.47	35.4	84.54	47.97	23.86	Male	S. olivacea
110.16	102.31	111.18	77.28	28.69	41.99	36.73	87.71	49.77	24.76	Male	S. olivacea
110.17	101.33	111.31	75.07	27.87	40.79	35.68	85.21	48.35	24.05	Male	S. olivacea
110.51	102.22	111.61	74.02	27.48	40.22	35.18	84.02	47.67	23.72	Male	S. olivacea
110.76	103.42	111.69	78.59	29.18	42.7	37.35	89.2	50.61	25.18	Male	S. olivacea
110.78	102.8	111.76	77.8	28.89	42.27	36.98	88.31	50.11	24.93	Male	S. olivacea
110.85	103.2	111.87	73.45	27.27	39.91	34.91	83.37	47.3	23.53	Male	S. olivacea
110.86	101.9	111.94	79.45	29.5	43.17	37.76	90.18	51.17	25.46	Male	S. olivacea
110.88	103.43	111.95	78.58	29.18	42.7	37.35	89.2	50.61	25.18	Male	S. olivacea
111.2	102	111.96	74.36	27.61	40.4	35.34	84.41	47.89	23.83	Male	S. olivacea
111.42	104.5	111.99	74.26	27.57	40.35	35.3	84.29	47.83	23.8	Male	S. olivacea
111.65	103.13	112.19	77.22	28.67	41.96	36.7	87.65	49.73	24.74	Male	S. olivacea
111.67	103.63	112.32	80.05	29.72	43.49	38.05	90.86	51.55	25.65	Male	S. olivacea
111.68	102.55	112.38	77.51	28.78	42.12	36.84	87.98	49.92	24.84	Male	S. olivacea
111.83	102.79	112.71	79.67	29.58	43.29	37.87	90.43	51.31	25.53	Male	S. olivacea
111.87	104.09	112.85	76.55	28.42	41.59	36.38	86.89	49.3	24.53	Male	S. olivacea
111.9	104.53	112.92	80.9	30.04	43.96	38.45	91.83	52.1	25.92	Male	S. olivacea
112.08	103.74	110.75	80.93	30.05	43.97	38.47	91.86	52.12	25.93	Male	S. olivacea
112.09	104.92	111.07	78.34	29.08	42.56	37.23	88.92	50.45	25.1	Male	S. olivacea
112.13	104.46	111.17	79.29	29.44	43.08	37.68	89.99	51.06	25.4	Male	S. olivacea
112.14	104.94	111.26	79.79	29.62	43.35	37.92	90.57	51.39	25.57	Male	S. olivacea
112.2	103.96	111.47	73.71	27.36	40.05	35.03	83.66	47.47	23.62	Male	S. olivacea
112.23	103.25	111.52	80.27	29.8	43.61	38.15	91.11	51.69	25.72	Male	S. olivacea
112.58	104.98	111.54	76.55	28.42	41.59	36.38	86.89	49.3	24.53	Male	S. olivacea
112.58	104.11	111.6	81.64	30.31	44.36	38.8	92.67	52.58	26.16	Male	S. olivacea
112.64	105.8	111.62	81.62	30.3	44.35	38.8	92.65	52.57	26.15	Male	S. olivacea
112.66	105.68	111.63	77.79	28.88	42.27	36.97	88.29	50.1	24.92	Male	S. olivacea
112.8	104.04	111.74	81.09	30.11	44.06	38.54	92.04	52.22	25.98	Male	S. olivacea
112.82	105.78	111.76	76.49	28.4	41.56	36.36	86.82	49.26	24.51	Male	S. olivacea
113.11	105.08	111.8	74.57	27.68	40.52	35.44	84.64	48.02	23.89	Male	S. olivacea
113.19	106.47	111.85	77.87	28.91	42.31	37.01	88.39	50.15	24.95	Male	S. olivacea
113.24	104.84	111.89	79.33	29.45	43.1	37.71	90.05	51.09	25.42	Male	S. olivacea
113.27	105.04	111.98	80.73	29.97	43.86	38.37	91.63	51.99	25.87	Male	S. olivacea
113.27	104.81	112.02	79.19	29.4	43.03	37.64	89.89	51	25.37	Male	S. olivacea
113.3	105.18	112.24	80.98	30.06	44	38.49	91.91	52.15	25.95	Male	S. olivacea
113.31	104.1	112.48	81.55	30.28	44.31	38.76	92.56	52.52	26.13	Male	S. olivacea
113.36	105.91	112.48	80.24	29.79	43.6	38.14	91.08	51.68	25.71	Male	S. olivacea
113.42	104.13	112.58	77.41	28.74	42.06	36.79	87.86	49.85	24.8	Male	S. olivacea
113.43	106.81	112.64	77.65	28.83	42.19	36.91	88.14	50.01	24.88	Male	S. olivacea
113.7	105.88	112.72	73.91	27.44	40.16	35.13	83.89	47.6	23.68	Male	S. olivacea
113.71	106.65	112.8	80.59	29.92	43.79	38.31	91.48	51.9	25.82	Male	S. olivacea
113.81	104.96	112.88	74.43	27.63	40.44	35.38	84.48	47.93	23.85	Male	S. olivacea
113.94	107.17	112.9	80.93	30.05	43.97	38.46	91.86	52.12	25.93	Male	S. olivacea
113.95	105.44	116.48	77.61	28.82	42.17	36.89	88.1	49.99	24.87	Male	S. olivacea
114.03	105.53	116.51	76.9	28.55	41.78	36.55	87.28	49.52	24.64	Male	S. olivacea
114.11	107.02	116.6	77.58	28.8	42.15	36.87	88.06	49.96	24.86	Male	S. olivacea
114.14	107.27	116.67	78.33	29.08	42.56	37.23	88.91	50.45	25.1	Male	S. olivacea
114.16	107.14	116.76	74.12	27.52	40.27	35.23	84.13	47.74	23.75	Male	S. olivacea
114.27	107.4	116.93	77.26	28.68	41.98	36.72	87.69	49.76	24.75	Male	S. olivacea
114.3	106.71	116.96	75.1	27.88	40.81	35.7	85.25	48.37	24.06	Male	S. olivacea
114.39	107.77	117.2	73.17	27.17	39.76	34.78	83.05	47.12	23.44	Male	S. olivacea
114.48	107.64	117.28	73.23	27.19	39.79	34.8	83.12	47.16	23.46	Male	S. olivacea
114.53	106.76	117.46	81.57	30.28	44.32	38.77	92.59	52.53	26.14	Male	S. olivacea
114.66	106.95	117.47	77.42	28.74	42.07	36.8	87.88	49.86	24.81	Male	S. olivacea
114.9	107.54	117.47	81.16	30.13	44.1	38.58	92.13	52.27	26.01	Male	S. olivacea
115.37	107.92	118.16	86.8	32.23	47.16	41.26	98.52	55.9	27.81	Male	S. olivacea
115.5	108.25	118.51	85.14	31.61	46.26	40.47	96.64	54.83	27.28	Male	S. olivacea
115.52	107.18	118.85	84.84	31.5	46.1	40.32	96.29	54.64	27.18	Male	S. olivacea
115.61	107.56	118.99	82.46	30.61	44.8	39.19	93.59	53.1	26.42	Male	S. olivacea
116.16	108.14	119.01	86.23	32.01	46.85	40.99	97.88	55.54	27.63	Male	S. olivacea
116.2	107.35	119.13	83.09	30.85	45.15	39.49	94.31	53.51	26.62	Male	S. olivacea
116.59	109.82	119.17	83.88	31.14	45.57	39.87	95.21	54.02	26.88	Male	S. olivacea
117.04	109.84	119.27	90.88	33.74	49.38	43.2	103.16	58.53	29.12	Male	S. olivacea
117.74	108.49	119.3	86.48	32.11	46.99	41.11	98.16	55.7	27.71	Male	S. olivacea
117.78	110.36	119.4	88.86	32.99	48.28	42.24	100.87	57.23	28.47	Male	S. olivacea
118.13	109.65	119.81	90.66	33.66	49.26	43.09	102.91	58.39	29.05	Male	S. olivacea
118.25	110.19	120.15	84.39	31.33	45.85	40.11	95.79	54.35	27.04	Male	S. olivacea
118.48	109.83	120.17	82.58	30.66	44.87	39.25	93.73	53.18	26.46	Male	S. olivacea
118.54	111.74	120.4	89.15	33.1	48.44	42.37	101.19	57.42	28.57	Male	S. olivacea
118.77	110.09	120.68	90.84	33.73	49.36	43.18	103.11	58.5	29.11	Male	S. olivacea
119	110.53	120.82	87.53	32.5	47.56	41.6	99.35	56.37	28.05	Male	S. olivacea
119.18	111.77	121.06	86.23	32.02	46.86	40.99	97.88	55.54	27.63	Male	S. olivacea
119.22	110.8	121.18	85.49	31.74	46.45	40.63	97.04	55.06	27.39	Male	S. olivacea
119.29	112.49	121.28	83.94	31.16	45.61	39.9	95.28	54.06	26.9	Male	S. olivacea
119.68	112.9	121.44	87.93	32.65	47.78	41.8	99.81	56.63	28.18	Male	S. olivacea
119.7	111.11	121.47	84.08	31.22	45.69	39.96	95.44	54.15	26.94	Male	S. olivacea
119.71	111.67	121.91	87.08	32.33	47.31	41.39	98.84	56.08	27.9	Male	S. olivacea
119.98	112.11	122.15	82.34	30.57	44.74	39.14	93.46	53.03	26.38	Male	S. olivacea
120.39	112.63	122.28	89.09	33.08	48.41	42.34	101.12	57.38	28.54	Male	S. olivacea
121.85	113.88	125.48	83.65	31.06	45.45	39.76	94.94	53.87	26.8	Male	S. olivacea
121.88	113.43	125.55	86.08	31.96	46.77	40.92	97.71	55.44	27.58	Male	S. olivacea
121.95	112.42	125.68	88.37	32.81	48.02	42	100.31	56.92	28.32	Male	S. olivacea
122.11	112.46	125.98	88.76	32.96	48.23	42.19	100.75	57.17	28.44	Male	S. olivacea
122.64	111.44	126.34	85.51	31.75	46.46	40.65	97.06	55.07	27.4	Male	S. olivacea
123.03	113.88	126.62	89.53	33.24	48.64	42.55	101.62	57.66	28.69	Male	S. olivacea
124.03	113.65	127	90.86	33.73	49.37	43.19	103.13	58.52	29.11	Male	S. olivacea
124.03	112.72	127.4	86.17	31.99	46.82	40.96	97.81	55.5	27.61	Male	S. olivacea
124.08	115.64	127.57	90.71	33.68	49.29	43.11	102.96	58.42	29.06	Male	S. olivacea
124.41	113.62	129.34	87.43	32.46	47.5	41.56	99.24	56.31	28.01	Male	S. olivacea
124.65	113.44	129.53	90.77	33.7	49.32	43.14	103.03	58.46	29.08	Male	S. olivacea
124.66	115.31	129.55	89.53	33.24	48.64	42.55	101.62	57.66	28.69	Male	S. olivacea
124.82	114.85	129.61	87.14	32.35	47.35	41.42	98.91	56.12	27.92	Male	S. olivacea
124.82	115.55	129.93	83.84	31.13	45.56	39.85	95.17	54	26.86	Male	S. olivacea
124.88	114.05	129.49	83.34	30.94	45.28	39.61	94.6	53.67	26.7	Male	S. olivacea
125.13	116.11	130.77	88.68	32.92	48.18	42.15	100.66	57.11	28.41	Male	S. olivacea
125.37	114.67	130.86	84.81	31.49	46.08	40.31	96.26	54.62	27.17	Male	S. olivacea
125.75	114.89	131.02	82.55	30.65	44.85	39.23	93.7	53.16	26.45	Male	S. olivacea
126.35	115.72	131.13	90.2	33.49	49.01	42.87	102.38	58.09	28.9	Male	S. olivacea
126.73	117.56	131.38	85.97	31.92	46.71	40.86	97.58	55.37	27.55	Male	S. olivacea
126.9	116.74	131.42	81.84	30.38	44.47	38.9	92.89	52.71	26.22	Male	S. olivacea
127.15	117.93	130.82	86.05	31.95	46.76	40.9	97.67	55.42	27.57	Male	S. olivacea
127.79	118.23	130.94	85.92	31.9	46.69	40.84	97.53	55.34	27.53	Male	S. olivacea
128.56	119.66	131.23	82.87	30.77	45.03	39.39	94.07	53.37	26.55	Male	S. olivacea
128.67	117.72	131.57	82.82	30.75	45	39.37	94.01	53.34	26.54	Male	S. olivacea
128.75	118.83	131.7	82.16	30.5	44.64	39.05	93.26	52.91	26.33	Male	S. olivacea
128.99	118.99	131.9	91.02	33.79	49.46	43.26	103.32	58.62	29.17	Male	S. olivacea
129.27	118.77	132.19	93.19	34.6	50.64	44.3	105.78	60.02	29.86	Male	S. olivacea
129.33	118.99	132.3	98.93	36.73	53.75	47.02	112.29	63.71	31.7	Male	S. olivacea
129.51	120.09	132.38	93.28	34.63	50.68	44.34	105.88	60.08	29.89	Male	S. olivacea
129.9	120.14	132.69	96.84	35.96	52.62	46.03	109.93	62.37	31.03	Male	S. olivacea
130.1	119.48	132.91	96.1	35.68	52.21	45.68	109.08	61.89	30.79	Male	S. olivacea
130.32	119.34	132.96	100.19	37.2	54.44	47.62	113.73	64.53	32.1	Male	S. olivacea
130.67	121.89	133.42	97.88	36.34	53.18	46.52	111.1	63.04	31.36	Male	S. olivacea
130.8	121.1	133.76	91.84	34.1	49.9	43.65	104.25	59.15	29.43	Male	S. olivacea
131.08	121.52	134.03	97.3	36.12	52.87	46.25	110.44	62.66	31.18	Male	S. olivacea
131.86	122.16	134.63	98.18	36.45	53.34	46.66	111.44	63.23	31.46	Male	S. olivacea
132.51	124	134.65	94.57	35.11	51.38	44.95	107.34	60.91	30.3	Male	S. olivacea
132.99	123.97	135.94	99.93	37.1	54.3	47.5	113.42	64.36	32.02	Male	S. olivacea
133.79	123.49	135.95	98.45	36.55	53.49	46.79	111.75	63.4	31.54	Male	S. olivacea
134.21	124.43	136.44	96.19	35.71	52.26	45.72	109.18	61.95	30.82	Male	S. olivacea
134.72	123.23	136.75	94.81	35.2	51.52	45.06	107.62	61.06	30.38	Male	S. olivacea
134.79	125.93	136.82	93.64	34.77	50.88	44.51	106.29	60.31	30	Male	S. olivacea
135.06	126.5	137.07	94.29	35.01	51.23	44.81	107.02	60.72	30.21	Male	S. olivacea
135.21	125.97	137.15	100.04	37.14	54.36	47.55	113.56	64.43	32.06	Male	S. olivacea
135.38	125.88	137.21	93.57	34.74	50.84	44.47	106.21	60.26	29.98	Male	S. olivacea
135.43	124.39	133.15	91.89	34.12	49.93	43.68	104.3	59.18	29.44	Male	S. olivacea
135.72	124.22	137.68	93.22	34.61	50.65	44.31	105.81	60.04	29.87	Male	S. olivacea
135.97	124.83	132.35	93.21	34.61	50.65	44.3	105.8	60.03	29.87	Male	S. olivacea
136.09	125.17	138.61	97.8	36.31	53.14	46.48	111.01	62.98	31.34	Male	S. olivacea
136.33	127.39	138.64	96.31	35.76	52.33	45.78	109.32	62.03	30.86	Male	S. olivacea
136.4	124.93	139.04	92.3	34.27	50.15	43.87	104.77	59.45	29.58	Male	S. olivacea
136.67	125.29	139.09	99.2	36.83	53.9	47.15	112.6	63.89	31.79	Male	S. olivacea
137.19	127.38	139.53	95.69	35.53	51.99	45.48	108.61	61.63	30.66	Male	S. olivacea
137.76	129.29	139.61	98.07	36.41	53.29	46.61	111.32	63.16	31.42	Male	S. olivacea
137.95	129.25	140.23	99.82	37.06	54.23	47.44	113.3	64.28	31.98	Male	S. olivacea
138.1	127.61	140.24	95.36	35.4	51.81	45.32	108.24	61.41	30.55	Male	S. olivacea
138.12	128.8	140.57	94.19	34.97	51.18	44.77	106.91	60.66	30.18	Male	S. olivacea
138.24	128.6	140.58	96.26	35.74	52.3	45.75	109.26	61.99	30.84	Male	S. olivacea
139.38	128.35	140.9	93.99	34.9	51.07	44.67	106.69	60.53	30.12	Male	S. olivacea
140.32	130.54	141.08	91.6	34.01	49.77	43.54	103.98	59	29.35	Male	S. olivacea
140.73	131.13	141.13	99.28	36.86	53.94	47.19	112.68	63.94	31.81	Male	S. olivacea
140.83	132.15	141.26	92.48	34.34	50.25	43.96	104.97	59.56	29.63	Male	S. olivacea
141.36	131.89	141.26	94.75	35.18	51.48	45.03	107.54	61.02	30.36	Male	S. olivacea
141.54	131.76	138.67	93.91	34.86	51.02	44.63	106.59	60.48	30.09	Male	S. olivacea
141.54	132.45	141.48	92.17	34.22	50.08	43.81	104.62	59.36	29.53	Male	S. olivacea
141.65	133.03	141.87	99.71	37.02	54.18	47.39	113.17	64.21	31.95	Male	S. olivacea
141.68	131.5	142.12	91.75	34.06	49.85	43.61	104.14	59.09	29.4	Male	S. olivacea
141.81	131.69	142.59	95.06	35.29	51.65	45.18	107.9	61.23	30.46	Male	S. olivacea
141.85	131.84	140.04	92.39	34.3	50.2	43.91	104.87	59.5	29.6	Male	S. olivacea
95.04	89.39	97.04	69.18	25.69	37.59	32.88	78.53	44.56	22.17	Male	S. olivacea
95.33	90.83	94.72	70.34	26.11	38.22	33.43	79.84	45.3	22.54	Male	S. olivacea
95.62	89.73	95.95	67.59	25.09	36.72	32.12	76.71	43.53	21.66	Male	S. olivacea
95.66	90.3	95.77	71.5	26.55	38.85	33.98	81.16	46.05	22.91	Male	S. olivacea
95.66	90.73	94.86	71.8	26.66	39.01	34.13	81.5	46.24	23.01	Male	S. olivacea
95.77	90.5	97.07	69.37	25.76	37.69	32.97	78.74	44.68	22.23	Male	S. olivacea
95.87	90.46	97.34	71.26	26.46	38.72	33.87	80.89	45.9	22.83	Male	S. olivacea
95.91	91.1	96.57	70.83	26.3	38.49	33.67	80.4	45.62	22.7	Male	S. olivacea
96.11	91.07	95.58	69.76	25.9	37.9	33.16	79.18	44.93	22.35	Male	S. olivacea
96.12	89.64	95.82	69.94	25.97	38	33.24	79.38	45.04	22.41	Male	S. olivacea
96.19	89.81	96.24	67.25	24.97	36.54	31.97	76.34	43.31	21.55	Male	S. olivacea
96.2	90.08	98.3	69.08	25.65	37.54	32.84	78.41	44.49	22.14	Male	S. olivacea
96.21	90.54	96.77	68.16	25.3	37.03	32.39	77.36	43.89	21.84	Male	S. olivacea
96.27	91.15	95.73	69.34	25.74	37.67	32.96	78.7	44.65	22.22	Male	S. olivacea
96.29	89.51	96.7	70.04	26	38.06	33.29	79.5	45.11	22.44	Male	S. olivacea
96.34	89.62	96.03	70.58	26.2	38.35	33.55	80.11	45.46	22.62	Male	S. olivacea
96.36	90.67	97.06	66.93	24.85	36.36	31.81	75.97	43.1	21.44	Male	S. olivacea
96.38	90.67	95.65	71.82	26.66	39.02	34.13	81.52	46.25	23.01	Male	S. olivacea
96.39	91.21	97.15	71.03	26.37	38.59	33.76	80.62	45.74	22.76	Male	S. olivacea
96.45	91.04	97.03	69.68	25.87	37.86	33.12	79.09	44.88	22.33	Male	S. olivacea
96.61	91.28	96.15	68.89	25.58	37.43	32.74	78.2	44.37	22.07	Male	S. olivacea
96.69	92.14	97.09	67.6	25.1	36.73	32.13	76.73	43.53	21.66	Male	S. olivacea
96.76	90.9	97.24	71.5	26.55	38.85	33.98	81.16	46.05	22.91	Male	S. olivacea
96.78	90.88	96.05	70.88	26.32	38.52	33.69	80.46	45.65	22.71	Male	S. olivacea
96.78	90	98.63	69.13	25.67	37.56	32.86	78.47	44.53	22.15	Male	S. olivacea
96.8	91.56	98.71	70.2	26.06	38.14	33.37	79.68	45.21	22.49	Male	S. olivacea
96.84	92.29	98.47	66.75	24.78	36.27	31.73	75.77	42.99	21.39	Male	S. olivacea
96.96	90.98	96.76	69.56	25.82	37.79	33.06	78.95	44.8	22.29	Male	S. olivacea
97	92.34	98.23	67.44	25.04	36.64	32.05	76.55	43.43	21.61	Male	S. olivacea
97.06	92.51	98.97	68.23	25.33	37.07	32.43	77.44	43.94	21.86	Male	S. olivacea
97.15	91.96	98.68	67.33	25	36.58	32	76.42	43.36	21.57	Male	S. olivacea
97.53	90.96	96.86	66.63	24.74	36.21	31.67	75.63	42.91	21.35	Male	S. olivacea
97.61	91.59	98.87	70.12	26.03	38.1	33.33	79.59	45.16	22.47	Male	S. olivacea
97.63	91.4	97.54	71.16	26.42	38.67	33.82	80.77	45.83	22.8	Male	S. olivacea
97.68	91.02	97.42	66.67	24.75	36.23	31.69	75.68	42.94	21.36	Male	S. olivacea
97.73	92.12	99.44	69.87	25.94	37.96	33.21	79.3	45	22.39	Male	S. olivacea
97.74	92.68	99.87	71.05	26.38	38.61	33.77	80.65	45.76	22.77	Male	S. olivacea
97.82	91.33	97.37	70.67	26.24	38.4	33.59	80.21	45.51	22.64	Male	S. olivacea
97.85	91.12	99.4	68.48	25.42	37.21	32.55	77.73	44.1	21.94	Male	S. olivacea
97.96	91.77	97.63	69.27	25.72	37.64	32.93	78.63	44.61	22.2	Male	S. olivacea
97.96	92.49	99.86	68.41	25.4	37.17	32.52	77.65	44.06	21.92	Male	S. olivacea
98	92.36	97.62	67.2	24.95	36.52	31.94	76.28	43.28	21.53	Male	S. olivacea
98.02	92.93	97.85	71.69	26.62	38.95	34.07	81.37	46.17	22.97	Male	S. olivacea
98.06	93.39	97.4	67.98	25.24	36.94	32.31	77.16	43.78	21.78	Male	S. olivacea
98.16	91.89	98.48	70.04	26	38.05	33.29	79.5	45.11	22.44	Male	S. olivacea
98.2	90.12	97.43	71.59	26.58	38.9	34.03	81.26	46.11	22.94	Male	S. olivacea
98.23	91.39	97.83	71.45	26.53	38.82	33.96	81.1	46.02	22.89	Male	S. olivacea
98.25	91.96	97.77	67.09	24.91	36.46	31.89	76.16	43.21	21.5	Male	S. olivacea
98.49	90.56	99.59	69.31	25.73	37.66	32.94	78.67	44.64	22.21	Male	S. olivacea
98.54	90.93	98.38	70.5	26.17	38.3	33.51	80.02	45.4	22.59	Male	S. olivacea
98.55	92.17	97.76	68.25	25.34	37.08	32.44	77.47	43.95	21.87	Male	S. olivacea
98.61	92.11	99.27	68.11	25.29	37.01	32.37	77.31	43.87	21.82	Male	S. olivacea
98.62	91.73	98	67.84	25.19	36.86	32.25	77	43.69	21.74	Male	S. olivacea
98.62	91.73	99.78	71.58	26.58	38.89	34.02	81.25	46.1	22.94	Male	S. olivacea
98.68	90.49	98.05	68.12	25.29	37.01	32.38	77.32	43.87	21.83	Male	S. olivacea
98.77	92.81	100.07	70.88	26.31	38.51	33.69	80.45	45.65	22.71	Male	S. olivacea
98.8	91.11	99.3	66.78	24.79	36.28	31.74	75.8	43.01	21.4	Male	S. olivacea
98.82	92.87	98.13	68.33	25.37	37.13	32.48	77.56	44.01	21.9	Male	S. olivacea
98.83	92.04	100.98	70.61	26.22	38.37	33.56	80.15	45.48	22.62	Male	S. olivacea
98.87	90.93	100.76	66.61	24.73	36.19	31.66	75.6	42.9	21.34	Male	S. olivacea
98.94	90.95	99.75	67.23	24.96	36.53	31.96	76.32	43.3	21.54	Male	S. olivacea
98.95	92.3	100.45	70.09	26.02	38.08	33.31	79.56	45.14	22.46	Male	S. olivacea
98.97	91.48	98.33	67.88	25.2	36.88	32.26	77.05	43.72	21.75	Male	S. olivacea
99.01	92.57	100.26	67.14	24.93	36.48	31.91	76.21	43.24	21.51	Male	S. olivacea
99.01	91.65	98.13	70.11	26.03	38.09	33.32	79.58	45.15	22.46	Male	S. olivacea
99.12	92.25	100.77	70.76	26.27	38.45	33.63	80.32	45.57	22.67	Male	S. olivacea
99.15	92.31	99.13	71.68	26.61	38.95	34.07	81.37	46.17	22.97	Male	S. olivacea
99.22	92.84	98.56	69.47	25.79	37.74	33.02	78.85	44.74	22.26	Male	S. olivacea
99.26	92.46	99.22	71.06	26.38	38.61	33.77	80.66	45.76	22.77	Male	S. olivacea
99.29	92.39	98.82	67	24.87	36.4	31.84	76.05	43.15	21.47	Male	S. olivacea
99.35	92.84	99.77	68.27	25.35	37.1	32.45	77.49	43.97	21.88	Male	S. olivacea
99.37	92.28	100.31	71.27	26.46	38.72	33.87	80.89	45.9	22.84	Male	S. olivacea
99.39	93.34	101.57	67.36	25.01	36.6	32.02	76.46	43.39	21.58	Male	S. olivacea
99.4	92.17	99.82	66.82	24.81	36.31	31.76	75.84	43.03	21.41	Male	S. olivacea
99.44	91.45	101.45	71.55	26.56	38.88	34.01	81.21	46.08	22.93	Male	S. olivacea
99.49	93.39	100.9	69.5	25.8	37.76	33.03	78.89	44.76	22.27	Male	S. olivacea
99.5	92.79	100.79	71.05	26.38	38.61	33.77	80.65	45.76	22.77	Male	S. olivacea
99.5	93.43	99	69.73	25.89	37.89	33.14	79.15	44.91	22.34	Male	S. olivacea
100.05	92.58	100.09	71.75	26.64	38.98	34.1	81.44	46.21	22.99	Male	S. olivacea
100.07	94.13	102.17	70.37	26.13	38.23	33.45	79.87	45.32	22.55	Male	S. olivacea
100.07	93.6	100.8	68	25.25	36.95	32.32	77.19	43.8	21.79	Male	S. olivacea
100.27	93.96	100.72	68.71	25.51	37.33	32.66	77.99	44.25	22.01	Male	S. olivacea
100.3	93.07	101.54	69.66	25.86	37.85	33.11	79.07	44.86	22.32	Male	S. olivacea
100.31	94.18	100.11	74.29	27.58	40.37	35.31	84.32	47.84	23.8	Male	S. olivacea
100.44	94.08	101.04	76.69	28.47	41.67	36.45	87.05	49.39	24.57	Male	S. olivacea
100.44	92.79	102.38	70.04	26	38.05	33.29	79.5	45.11	22.44	Male	S. olivacea
100.6	94.19	100.13	77.49	28.77	42.1	36.83	87.95	49.9	24.83	Male	S. olivacea
100.64	94.17	100.68	68	25.25	36.95	32.32	77.18	43.79	21.79	Male	S. olivacea
100.64	94.64	101.03	73.35	27.23	39.85	34.86	83.25	47.24	23.5	Male	S. olivacea
100.85	92.81	101.24	75.22	27.93	40.87	35.75	85.37	48.44	24.1	Male	S. olivacea
100.86	93.57	100.79	75	27.85	40.75	35.65	85.13	48.3	24.03	Male	S. olivacea
100.93	92.97	102.1	76.72	28.48	41.69	36.47	87.09	49.41	24.58	Male	S. olivacea
100.97	94.85	101.76	75.78	28.14	41.18	36.02	86.02	48.81	24.28	Male	S. olivacea
101.01	94.78	102.96	77.16	28.65	41.93	36.67	87.58	49.69	24.72	Male	S. olivacea
101.08	94.76	101.05	77.27	28.69	41.98	36.73	87.71	49.76	24.76	Male	S. olivacea
101.22	93.15	101.51	69.27	25.72	37.64	32.92	78.63	44.61	22.2	Male	S. olivacea
101.49	93.35	103.33	77.13	28.64	41.91	36.66	87.55	49.68	24.71	Male	S. olivacea
101.88	95.7	101.31	70.48	26.17	38.29	33.5	80	45.39	22.58	Male	S. olivacea
102.25	95.09	103.1	71.63	26.59	38.92	34.05	81.31	46.13	22.95	Male	S. olivacea
102.43	95.44	102.57	71.91	26.7	39.08	34.18	81.63	46.32	23.04	Male	S. olivacea
102.53	96.1	101.85	68.94	25.59	37.46	32.77	78.25	44.4	22.09	Male	S. olivacea
102.55	96.22	104.7	71.33	26.48	38.76	33.9	80.96	45.94	22.85	Male	S. olivacea
102.91	96.23	102.19	71.4	26.51	38.79	33.94	81.04	45.98	22.88	Male	S. olivacea
102.93	95.01	103.81	71.69	26.62	38.95	34.08	81.38	46.17	22.97	Male	S. olivacea
102.94	95.01	103.56	77.24	28.68	41.97	36.71	87.67	49.74	24.75	Male	S. olivacea
103.16	95.94	105.05	76.18	28.28	41.39	36.21	86.47	49.06	24.41	Male	S. olivacea
103.28	95.42	102.67	77.03	28.6	41.86	36.61	87.44	49.61	24.68	Male	S. olivacea
103.53	97.37	104.56	68.33	25.37	37.13	32.48	77.56	44.01	21.89	Male	S. olivacea
103.58	97.11	103.04	70.44	26.15	38.27	33.48	79.95	45.37	22.57	Male	S. olivacea
103.74	97.69	105.48	75.99	28.21	41.29	36.12	86.26	48.94	24.35	Male	S. olivacea
103.81	96.06	103.02	74.32	27.59	40.38	35.33	84.36	47.87	23.81	Male	S. olivacea
104.01	96.34	103.88	69.86	25.94	37.96	33.2	79.29	44.99	22.38	Male	S. olivacea
104.09	96.31	105.75	77.28	28.69	41.99	36.73	87.72	49.77	24.76	Male	S. olivacea
104.43	97.26	104.3	75.19	27.91	40.85	35.74	85.34	48.42	24.09	Male	S. olivacea
104.45	96.9	103.65	76.59	28.44	41.62	36.4	86.94	49.33	24.54	Male	S. olivacea
104.56	97.67	106.06	69	25.62	37.49	32.8	78.32	44.44	22.11	Male	S. olivacea
104.59	98.68	105.1	74.33	27.6	40.39	35.33	84.37	47.87	23.82	Male	S. olivacea
104.67	97.31	105.87	73.2	27.18	39.78	34.79	83.09	47.15	23.46	Male	S. olivacea
104.91	97.21	104.67	72.28	26.84	39.27	34.36	82.05	46.55	23.16	Male	S. olivacea
105.07	97.38	104.62	68.04	25.26	36.97	32.34	77.23	43.82	21.8	Male	S. olivacea
105.2	98.44	107.05	70.26	26.08	38.18	33.39	79.75	45.25	22.51	Male	S. olivacea
105.22	97.13	104.78	69.62	25.85	37.83	33.09	79.03	44.84	22.31	Male	S. olivacea
105.47	99.35	106.7	77.15	28.64	41.92	36.67	87.57	49.68	24.72	Male	S. olivacea
105.52	98.82	105.18	77.2	28.66	41.94	36.69	87.62	49.72	24.74	Male	S. olivacea
105.55	97.56	107.22	68.55	25.45	37.25	32.58	77.81	44.15	21.97	Male	S. olivacea
105.61	97.81	106.25	71.55	26.56	38.88	34.01	81.21	46.08	22.93	Male	S. olivacea
106.27	99.27	106.87	69.99	25.98	38.03	33.26	79.44	45.07	22.42	Male	S. olivacea
106.41	100.35	106.06	68.36	25.38	37.15	32.49	77.6	44.03	21.91	Male	S. olivacea
106.5	98.85	107.56	68.29	25.36	37.11	32.46	77.52	43.98	21.88	Male	S. olivacea
106.57	98.84	108.22	73.27	27.2	39.81	34.83	83.17	47.19	23.48	Male	S. olivacea
106.88	99.03	108.29	69.35	25.75	37.68	32.96	78.72	44.67	22.22	Male	S. olivacea
106.95	99.15	109.1	72.94	27.08	39.63	34.67	82.79	46.97	23.37	Male	S. olivacea
107	99.1	107.99	74.48	27.65	40.47	35.4	84.54	47.97	23.86	Male	S. olivacea
107.08	98.9	107.55	74.51	27.66	40.48	35.41	84.57	47.99	23.87	Male	S. olivacea
107.23	98.4	108.81	75.2	27.92	40.86	35.74	85.36	48.43	24.1	Male	S. olivacea
107.42	99.57	106.8	69.79	25.91	37.92	33.17	79.22	44.95	22.36	Male	S. olivacea
107.64	99.01	109.35	74.99	27.84	40.74	35.64	85.11	48.29	24.03	Male	S. olivacea
107.89	100.29	107.33	73.88	27.43	40.14	35.12	83.86	47.58	23.67	Male	S. olivacea
107.9	101.02	108.26	75.17	27.91	40.85	35.73	85.33	48.41	24.09	Male	S. olivacea
107.92	101.05	109.99	73.27	27.2	39.81	34.83	83.17	47.19	23.48	Male	S. olivacea
107.92	101.19	109.82	70.89	26.32	38.52	33.69	80.46	45.65	22.71	Male	S. olivacea
107.93	100.71	109.7	75.22	27.93	40.87	35.75	85.38	48.45	24.1	Male	S. olivacea
107.99	99.53	109.74	70.25	26.08	38.17	33.39	79.74	45.25	22.51	Male	S. olivacea
108.01	101.09	110.15	76.73	28.49	41.69	36.47	87.09	49.42	24.58	Male	S. olivacea
108.17	99.89	108.8	69.22	25.7	37.61	32.9	78.57	44.58	22.18	Male	S. olivacea
108.32	99.43	108.49	72.06	26.75	39.16	34.25	81.8	46.41	23.09	Male	S. olivacea
108.39	100.01	107.88	69.52	25.81	37.78	33.05	78.92	44.78	22.28	Male	S. olivacea
108.48	100.09	108.73	69.39	25.76	37.71	32.98	78.77	44.69	22.24	Male	S. olivacea
108.57	99.57	109.13	76.87	28.54	41.77	36.54	87.26	49.51	24.63	Male	S. olivacea
108.7	99.51	110.81	76.79	28.51	41.73	36.5	87.17	49.46	24.61	Male	S. olivacea
109.29	101.86	110.73	73.38	27.24	39.87	34.88	83.29	47.26	23.51	Male	S. olivacea
109.3	102.23	109.9	85.5	31.74	46.46	40.64	97.05	55.06	27.39	Male	S. olivacea
109.34	102.44	109.88	78.79	29.25	42.81	37.45	89.43	50.74	25.24	Male	S. olivacea
109.34	101.82	110.75	75.46	28.01	41	35.86	85.65	48.6	24.18	Male	S. olivacea
109.4	101.96	108.85	83.1	30.85	45.15	39.5	94.32	53.52	26.63	Male	S. olivacea
109.42	100.24	110.51	77.58	28.8	42.16	36.88	88.06	49.97	24.86	Male	S. olivacea
109.43	102.65	110	75.37	27.98	40.96	35.83	85.56	48.54	24.15	Male	S. olivacea
109.63	103.01	111.27	79.47	29.51	43.18	37.77	90.21	51.18	25.46	Male	S. olivacea
109.63	102.31	110.51	84.69	31.44	46.01	40.25	96.13	54.54	27.14	Male	S. olivacea
109.97	102.34	110.22	84.11	31.23	45.7	39.98	95.47	54.17	26.95	Male	S. olivacea
110.01	101.24	111.31	82.51	30.63	44.83	39.22	93.66	53.14	26.44	Male	S. olivacea
110.25	102.99	109.83	76.15	28.27	41.38	36.2	86.44	49.04	24.4	Male	S. olivacea
110.63	103.01	111.95	74.35	27.6	40.4	35.34	84.39	47.88	23.82	Male	S. olivacea
111.12	102.92	112.54	74.97	27.83	40.73	35.63	85.1	48.28	24.02	Male	S. olivacea
111.31	103.39	112.24	76.53	28.41	41.58	36.37	86.87	49.29	24.52	Male	S. olivacea
112.64	105.53	114.43	78.77	29.25	42.8	37.44	89.41	50.73	25.24	Male	S. olivacea
112.69	105.63	112.83	80.3	29.81	43.63	38.17	91.15	51.72	25.73	Male	S. olivacea
112.87	105.23	113.24	76.76	28.5	41.71	36.48	87.12	49.43	24.59	Male	S. olivacea
112.95	105.62	114.49	74.55	27.68	40.51	35.43	84.62	48.01	23.89	Male	S. olivacea
112.95	103.92	112.4	80.32	29.82	43.64	38.18	91.17	51.73	25.74	Male	S. olivacea
113.05	104.48	112.54	77.17	28.65	41.93	36.68	87.59	49.7	24.73	Male	S. olivacea
113.13	106.28	114.52	74.31	27.59	40.38	35.32	84.35	47.86	23.81	Male	S. olivacea
113.75	106.13	113.97	75.77	28.13	41.17	36.01	86	48.8	24.28	Male	S. olivacea
113.99	106.5	113.1	83.2	30.89	45.21	39.54	94.44	53.58	26.66	Male	S. olivacea
114.08	106.18	114.15	80.17	29.77	43.56	38.11	91	51.63	25.69	Male	S. olivacea
114.17	106.42	115.86	75.07	27.87	40.79	35.68	85.21	48.35	24.05	Male	S. olivacea
114.4	106.3	116.51	75.23	27.93	40.88	35.76	85.39	48.45	24.1	Male	S. olivacea
114.64	106.43	113.9	79.09	29.36	42.97	37.59	89.77	50.93	25.34	Male	S. olivacea
114.69	107.39	114.56	85.71	31.82	46.57	40.74	97.29	55.2	27.46	Male	S. olivacea
115.26	106.66	115.11	79	29.33	42.92	37.55	89.67	50.88	25.31	Male	S. olivacea
115.27	107.38	114.77	85.57	31.77	46.5	40.67	97.13	55.11	27.42	Male	S. olivacea
115.33	108.53	116.36	84.55	31.39	45.94	40.19	95.97	54.46	27.09	Male	S. olivacea
115.63	108.12	117.05	74.93	27.82	40.71	35.62	85.05	48.26	24.01	Male	S. olivacea
115.77	106.82	116.89	81.59	30.29	44.33	38.78	92.62	52.55	26.14	Male	S. olivacea
115.78	108.53	116.92	75.47	28.02	41.01	35.87	85.66	48.61	24.18	Male	S. olivacea
115.79	107.2	116.57	80.94	30.05	43.98	38.47	91.87	52.13	25.93	Male	S. olivacea
115.92	106.8	115.8	84.38	31.33	45.85	40.1	95.77	54.34	27.04	Male	S. olivacea
115.96	107.68	117.36	75.23	27.93	40.88	35.76	85.39	48.45	24.1	Male	S. olivacea
116.03	107.03	116.6	78.58	29.18	42.7	37.35	89.2	50.61	25.18	Male	S. olivacea
116.33	108.85	117.66	78.89	29.29	42.86	37.49	89.54	50.8	25.28	Male	S. olivacea
116.9	109.05	116.49	78.8	29.26	42.81	37.45	89.44	50.75	25.25	Male	S. olivacea
117.15	110.26	117.57	81.67	30.32	44.37	38.82	92.7	52.6	26.17	Male	S. olivacea
117.47	109.2	117.7	82.93	30.79	45.06	39.42	94.13	53.41	26.57	Male	S. olivacea
117.48	109.48	116.74	82.32	30.56	44.73	39.13	93.44	53.02	26.38	Male	S. olivacea
117.5	110.62	118.29	77.33	28.71	42.02	36.75	87.77	49.8	24.78	Male	S. olivacea
117.7	109.73	119.86	77.24	28.68	41.97	36.71	87.68	49.75	24.75	Male	S. olivacea
117.7	110.1	116.97	74.79	27.77	40.64	35.55	84.89	48.17	23.96	Male	S. olivacea
117.86	110.82	119.52	75.2	27.92	40.86	35.74	85.35	48.43	24.09	Male	S. olivacea
117.92	109.2	118.61	79.62	29.56	43.26	37.85	90.38	51.28	25.51	Male	S. olivacea
117.96	109.49	120.07	74.16	27.53	40.29	35.25	84.18	47.76	23.76	Male	S. olivacea
117.97	110.92	118.8	81.82	30.38	44.46	38.89	92.87	52.69	26.22	Male	S. olivacea
118.28	111.34	120.38	78.01	28.96	42.39	37.08	88.55	50.24	25	Male	S. olivacea
118.51	111.66	120.61	79.48	29.51	43.19	37.78	90.22	51.19	25.47	Male	S. olivacea
118.83	111.03	120.72	76.79	28.51	41.73	36.5	87.17	49.46	24.61	Male	S. olivacea
118.95	110.88	119.37	82.91	30.78	45.05	39.41	94.11	53.4	26.57	Male	S. olivacea
119.05	110.72	120.48	83.69	31.07	45.47	39.78	94.99	53.9	26.81	Male	S. olivacea
119.26	111.23	120.47	78.39	29.1	42.59	37.26	88.98	50.48	25.12	Male	S. olivacea
119.34	111.41	119.9	79.05	29.35	42.95	37.57	89.73	50.91	25.33	Male	S. olivacea
119.87	111.25	119.95	83.45	30.98	45.34	39.67	94.73	53.75	26.74	Male	S. olivacea
119.87	110.92	119.13	78.37	29.09	42.58	37.25	88.95	50.47	25.11	Male	S. olivacea
120.09	112.26	122.27	74.9	27.81	40.7	35.6	85.02	48.24	24	Male	S. olivacea
120.45	113.82	120.88	74.69	27.73	40.58	35.5	84.78	48.1	23.93	Male	S. olivacea
121.5	110.45	120.95	82.22	30.53	44.68	39.08	93.33	52.95	26.35	Male	S. olivacea
121.74	110.77	121.5	75.61	28.07	41.08	35.94	85.82	48.69	24.23	Male	S. olivacea
121.89	110.65	121.28	80.41	29.85	43.69	38.22	91.27	51.78	25.76	Male	S. olivacea
122.13	111.38	122.28	83.33	30.94	45.28	39.61	94.59	53.67	26.7	Male	S. olivacea
122.15	113.55	121.51	75.64	28.08	41.1	35.95	85.85	48.71	24.24	Male	S. olivacea
122.16	112.89	121.88	76.18	28.28	41.39	36.21	86.47	49.06	24.41	Male	S. olivacea
122.2	111.54	123.39	82.62	30.67	44.89	39.27	93.78	53.21	26.47	Male	S. olivacea
122.24	112.18	123.31	74.32	27.59	40.38	35.32	84.36	47.86	23.81	Male	S. olivacea
122.92	112.52	123.62	75.01	27.85	40.76	35.65	85.15	48.31	24.04	Male	S. olivacea
123.06	112.88	123.14	83.47	30.99	45.35	39.67	94.75	53.76	26.75	Male	S. olivacea
123.15	114.32	123.61	82.35	30.57	44.74	39.14	93.47	53.03	26.39	Male	S. olivacea
123.25	114.47	124.15	78.94	29.31	42.89	37.52	89.6	50.84	25.29	Male	S. olivacea
123.25	114.9	124.31	85.3	31.67	46.35	40.54	96.82	54.94	27.33	Male	S. olivacea
123.33	112.7	125.01	83.27	30.92	45.25	39.58	94.52	53.63	26.68	Male	S. olivacea
123.4	114.42	125.04	76.25	28.31	41.43	36.24	86.55	49.11	24.43	Male	S. olivacea
123.47	112.36	124.58	79.42	29.49	43.15	37.75	90.15	51.15	25.45	Male	S. olivacea
123.63	114.68	123.46	75.03	27.86	40.77	35.66	85.16	48.32	24.04	Male	S. olivacea
123.78	114.59	123.6	78.63	29.19	42.72	37.37	89.25	50.64	25.19	Male	S. olivacea
123.79	112.83	125.52	76.15	28.27	41.37	36.19	86.43	49.04	24.4	Male	S. olivacea
124	114.84	124.18	75.6	28.07	41.08	35.93	85.81	48.69	24.22	Male	S. olivacea
124.13	113.28	124.2	79.91	29.67	43.42	37.98	90.7	51.47	25.6	Male	S. olivacea
124.15	114.74	123.75	84.77	31.47	46.06	40.29	96.21	54.59	27.16	Male	S. olivacea
124.22	112.78	124.18	82.79	30.74	44.99	39.35	93.98	53.32	26.53	Male	S. olivacea
124.3	115.06	125.32	84.79	31.48	46.07	40.3	96.24	54.61	27.17	Male	S. olivacea
124.56	115.43	125.05	80.95	30.05	43.99	38.48	91.89	52.14	25.94	Male	S. olivacea
124.59	114.55	125.39	90.65	33.66	49.26	43.09	102.9	58.38	29.05	Male	S. olivacea
124.61	115.53	125.1	99.5	36.94	54.06	47.29	112.94	64.08	31.88	Male	S. olivacea
124.7	114.01	123.82	97.7	36.27	53.09	46.44	110.9	62.92	31.31	Male	S. olivacea
124.97	115.5	125.61	101.11	37.54	54.94	48.06	114.77	65.12	32.4	Male	S. olivacea
125.79	115.59	126.03	88.18	32.74	47.91	41.91	100.09	56.79	28.25	Male	S. olivacea
125.84	116.89	126.16	90.38	33.55	49.11	42.96	102.59	58.21	28.96	Male	S. olivacea
126.15	117.05	126.4	91.71	34.05	49.83	43.59	104.1	59.07	29.39	Male	S. olivacea
127.03	118.37	129.22	88.04	32.69	47.84	41.85	99.94	56.7	28.21	Male	S. olivacea
127.3	116.27	129.11	88.37	32.81	48.02	42	100.31	56.91	28.32	Male	S. olivacea
127.44	119.02	129.17	95.69	35.53	51.99	45.48	108.61	61.63	30.66	Male	S. olivacea
128.15	119.01	129.12	96.77	35.93	52.58	45.99	109.84	62.32	31.01	Male	S. olivacea
128.51	118.85	129.13	98.39	36.53	53.46	46.77	111.68	63.37	31.53	Male	S. olivacea
128.56	117.4	130.17	91.23	33.87	49.57	43.36	103.56	58.76	29.23	Male	S. olivacea
130.24	118.97	132.25	94.13	34.95	51.14	44.74	106.84	60.62	30.16	Male	S. olivacea
130.57	119.18	132.02	94.04	34.92	51.1	44.7	106.74	60.57	30.13	Male	S. olivacea
130.67	120.03	131.17	100.51	37.32	54.61	47.77	114.08	64.73	32.2	Male	S. olivacea
130.71	121.16	129.86	96.69	35.9	52.54	45.96	109.76	62.27	30.98	Male	S. olivacea
131.32	120.78	132.03	89.51	33.23	48.63	42.54	101.6	57.65	28.68	Male	S. olivacea
131.82	122.51	132.14	90.37	33.55	49.1	42.95	102.57	58.2	28.95	Male	S. olivacea
133.04	123.79	132.23	97.14	36.06	52.78	46.17	110.26	62.56	31.12	Male	S. olivacea
133.12	122.54	134.41	90.16	33.47	48.99	42.85	102.34	58.07	28.89	Male	S. olivacea
133.29	122.74	134.4	96.37	35.78	52.36	45.81	109.39	62.07	30.88	Male	S. olivacea
133.73	124.9	134.35	87.31	32.42	47.44	41.5	99.1	56.23	27.98	Male	S. olivacea
133.98	124.45	134.2	94.52	35.09	51.36	44.93	107.29	60.88	30.29	Male	S. olivacea
134.1	124.27	135.99	94.01	34.9	51.08	44.68	106.71	60.55	30.12	Male	S. olivacea
134.31	124.82	133.83	92.61	34.38	50.32	44.02	105.12	59.64	29.67	Male	S. olivacea
134.65	123.97	136.19	99.74	37.03	54.19	47.41	113.21	64.24	31.96	Male	S. olivacea
134.81	126.25	135.9	88.01	32.68	47.82	41.83	99.9	56.68	28.2	Male	S. olivacea
135.26	125.02	134.66	87.28	32.41	47.43	41.49	99.07	56.21	27.97	Male	S. olivacea
135.59	125.89	136.88	87.41	32.45	47.49	41.55	99.22	56.3	28.01	Male	S. olivacea
135.61	126.05	137.43	91.98	34.15	49.98	43.72	104.4	59.24	29.47	Male	S. olivacea
135.85	124.68	137.06	97.05	36.03	52.73	46.13	110.16	62.5	31.1	Male	S. olivacea
136.16	124.98	138.02	90.1	33.45	48.96	42.83	102.27	58.03	28.87	Male	S. olivacea
136.45	127.26	137.54	90.39	33.56	49.11	42.96	102.6	58.21	28.96	Male	S. olivacea
136.94	125.91	138.86	95.17	35.33	51.71	45.24	108.03	61.29	30.49	Male	S. olivacea
137.57	126.15	137.16	101.34	37.62	55.06	48.17	115.02	65.26	32.47	Male	S. olivacea
137.65	126.49	138.19	99.85	37.07	54.25	47.46	113.34	64.31	31.99	Male	S. olivacea
137.83	128.39	138.31	97.16	36.07	52.79	46.18	110.28	62.58	31.13	Male	S. olivacea
139.16	127.98	140.43	93.21	34.61	50.65	44.3	105.8	60.03	29.87	Male	S. olivacea
139.22	130.17	139.83	91.41	33.94	49.67	43.45	103.75	58.87	29.29	Male	S. olivacea
139.45	130.54	141.11	94.8	35.2	51.51	45.06	107.61	61.06	30.38	Male	S. olivacea
139.66	129.08	139.74	91.74	34.06	49.85	43.61	104.13	59.09	29.4	Male	S. olivacea
139.84	132.12	141.07	94.15	34.95	51.15	44.75	106.86	60.63	30.17	Male	S. olivacea
140.2	131.15	141.02	96.35	35.77	52.35	45.8	109.37	62.05	30.87	Male	S. olivacea
140.28	129.66	141.35	94.37	35.04	51.27	44.85	107.11	60.78	30.24	Male	S. olivacea
140.72	129.79	139.99	94.45	35.07	51.32	44.89	107.21	60.83	30.26	Male	S. olivacea
140.79	132.31	142.76	98.77	36.67	53.67	46.95	112.11	63.61	31.65	Male	S. olivacea
140.86	132.16	142.78	86.46	32.1	46.98	41.09	98.14	55.68	27.7	Male	S. olivacea
140.87	131.39	141.96	100.8	37.43	54.77	47.91	114.42	64.92	32.3	Male	S. olivacea
141.55	131	141.96	95.35	35.4	51.81	45.32	108.23	61.41	30.55	Male	S. olivacea
141.88	132.67	141.36	97.44	36.18	52.94	46.31	110.6	62.75	31.22	Male	S. olivacea
142.38	131.25	141.6	96.3	35.75	52.33	45.77	109.31	62.02	30.86	Male	S. olivacea
142.54	133.95	142.02	88.52	32.86	48.09	42.07	100.47	57.01	28.36	Male	S. olivacea
142.83	134.47	142.69	99.5	36.94	54.06	47.29	112.94	64.08	31.88	Male	S. olivacea
143.31	131.87	143.92	94.73	35.17	51.47	45.03	107.52	61.01	30.35	Male	S. olivacea
143.63	134.96	143.89	85.79	31.85	46.61	40.78	97.37	55.25	27.49	Male	S. olivacea
143.93	134.59	143.51	85.77	31.84	46.6	40.77	97.35	55.24	27.48	Male	S. olivacea
144.41	134.21	146	96.04	35.66	52.19	45.65	109.02	61.86	30.77	Male	S. olivacea
145.72	135.6	147.58	85.3	31.67	46.35	40.54	96.82	54.94	27.33	Male	S. olivacea
145.74	135.73	147.71	87.43	32.46	47.51	41.56	99.24	56.31	28.02	Male	S. olivacea
147.51	136.99	149.08	88.59	32.89	48.14	42.11	100.56	57.06	28.39	Male	S. olivacea
147.59	138.36	148.5	98.37	36.52	53.45	46.76	111.66	63.35	31.52	Male	S. olivacea
97.03	91.72	97.63	70.53	26.19	38.32	33.52	80.06	45.43	22.6	Male	S. olivacea
96.25	91.33	98.38	66.18	24.57	35.96	31.46	75.12	42.63	21.21	Male	S. olivacea
96.32	90.96	98.24	69.18	25.68	37.59	32.88	78.52	44.55	22.17	Male	S. olivacea
96.38	90.99	97.53	69.47	25.79	37.75	33.02	78.86	44.74	22.26	Male	S. olivacea
96.42	91.3	98.3	68.43	25.4	37.18	32.52	77.67	44.07	21.93	Male	S. olivacea
96.43	90.96	96.97	68	25.25	36.95	32.32	77.19	43.8	21.79	Male	S. olivacea
96.46	91.43	98.01	68.72	25.51	37.34	32.66	78	44.26	22.02	Male	S. olivacea
96.46	91.17	97.91	71.07	26.39	38.62	33.78	80.67	45.77	22.77	Male	S. olivacea
96.47	91.71	97.88	66.08	24.53	35.9	31.41	75	42.56	21.17	Male	S. olivacea
96.5	91.68	96.93	65.95	24.48	35.83	31.35	74.86	42.47	21.13	Male	S. olivacea
96.53	90.97	97.28	66.28	24.61	36.02	31.51	75.24	42.69	21.24	Male	S. olivacea
96.58	91	98.72	67.76	25.16	36.82	32.21	76.92	43.64	21.71	Male	S. olivacea
96.69	91.58	98.84	65.99	24.5	35.86	31.37	74.91	42.5	21.14	Male	S. olivacea
96.74	91.77	97.79	70.67	26.24	38.4	33.59	80.22	45.51	22.64	Male	S. olivacea
96.76	91.83	97.23	67.36	25.01	36.6	32.02	76.46	43.38	21.58	Male	S. olivacea
96.8	91.06	97.61	70.13	26.04	38.11	33.33	79.61	45.17	22.47	Male	S. olivacea
96.84	91.89	96.98	66.57	24.71	36.17	31.64	75.56	42.87	21.33	Male	S. olivacea
96.86	91.96	97.53	68.6	25.47	37.27	32.6	77.86	44.18	21.98	Male	S. olivacea
96.9	91.71	98.45	68.32	25.36	37.12	32.47	77.55	44	21.89	Male	S. olivacea
96.94	91.94	97.45	67.68	25.13	36.78	32.17	76.82	43.59	21.69	Male	S. olivacea
96.96	91.85	98.6	70.73	26.26	38.43	33.62	80.28	45.55	22.66	Male	S. olivacea
96.97	91.67	98.27	71.44	26.52	38.82	33.95	81.09	46.01	22.89	Male	S. olivacea
96.98	91.59	97.55	72.08	26.76	39.16	34.26	81.81	46.42	23.09	Male	S. olivacea
97.03	92.26	97.22	71.32	26.48	38.75	33.9	80.95	45.93	22.85	Male	S. olivacea
97.33	91.65	98.76	65.92	24.48	35.82	31.33	74.83	42.46	21.12	Male	S. olivacea
97.33	91.77	97.54	70.89	26.32	38.52	33.69	80.46	45.65	22.71	Male	S. olivacea
97.4	92.38	98.03	72.42	26.89	39.35	34.42	82.21	46.64	23.21	Male	S. olivacea
97.42	92	99.29	68.57	25.46	37.26	32.59	77.83	44.16	21.97	Male	S. olivacea
97.43	92.71	97.81	68.47	25.42	37.21	32.55	77.72	44.1	21.94	Male	S. olivacea
97.45	91.88	98.46	66.78	24.79	36.28	31.74	75.8	43.01	21.4	Male	S. olivacea
97.5	92.04	98.31	68.57	25.46	37.26	32.59	77.83	44.16	21.97	Male	S. olivacea
97.51	92.59	97.83	69.88	25.94	37.97	33.21	79.32	45.01	22.39	Male	S. olivacea
97.6	92.02	98.75	70.62	26.22	38.37	33.56	80.15	45.48	22.63	Male	S. olivacea
97.62	92.91	97.65	70.15	26.04	38.12	33.34	79.62	45.18	22.48	Male	S. olivacea
97.62	92.08	99.37	67.82	25.18	36.85	32.24	76.98	43.68	21.73	Male	S. olivacea
97.63	92.26	99.61	71.22	26.44	38.7	33.85	80.85	45.87	22.82	Male	S. olivacea
97.64	92.43	98.13	72.09	26.77	39.17	34.27	81.83	46.43	23.1	Male	S. olivacea
97.65	92.78	99.84	66.12	24.55	35.93	31.43	75.06	42.59	21.19	Male	S. olivacea
97.65	92.27	99.73	69.79	25.91	37.92	33.17	79.21	44.95	22.36	Male	S. olivacea
97.71	92.92	98.33	68.16	25.31	37.04	32.4	77.37	43.9	21.84	Male	S. olivacea
97.74	92.9	98.28	66.03	24.51	35.88	31.38	74.95	42.52	21.16	Male	S. olivacea
97.78	93.06	98.47	67.92	25.22	36.9	32.28	77.09	43.74	21.76	Male	S. olivacea
97.79	92.09	97.81	66.64	24.74	36.21	31.68	75.64	42.92	21.35	Male	S. olivacea
97.8	92.97	98.67	67.65	25.12	36.76	32.15	76.79	43.57	21.68	Male	S. olivacea
97.81	92.35	99.62	66.01	24.51	35.87	31.37	74.93	42.51	21.15	Male	S. olivacea
97.83	92.64	98.57	70.8	26.29	38.47	33.65	80.36	45.6	22.69	Male	S. olivacea
97.94	93.24	98.73	68.82	25.55	37.39	32.71	78.12	44.32	22.05	Male	S. olivacea
97.99	92.87	98.59	66.75	24.78	36.27	31.73	75.77	42.99	21.39	Male	S. olivacea
98.01	93.25	99.99	67.78	25.17	36.83	32.22	76.94	43.65	21.72	Male	S. olivacea
98.06	93.04	99.11	68.31	25.36	37.12	32.47	77.54	43.99	21.89	Male	S. olivacea
98.19	93.26	98.91	67.59	25.09	36.73	32.13	76.72	43.53	21.66	Male	S. olivacea
98.2	92.53	99.69	69.69	25.87	37.86	33.12	79.1	44.88	22.33	Male	S. olivacea
98.2	93.44	99.16	66.3	24.62	36.02	31.51	75.25	42.7	21.24	Male	S. olivacea
98.21	93.29	99.52	69.94	25.97	38	33.24	79.39	45.05	22.41	Male	S. olivacea
98.21	92.86	99.66	68.59	25.46	37.27	32.6	77.85	44.17	21.98	Male	S. olivacea
98.25	93.52	100.06	70.44	26.15	38.27	33.48	79.95	45.37	22.57	Male	S. olivacea
98.25	93.44	100.25	70.97	26.35	38.56	33.73	80.55	45.71	22.74	Male	S. olivacea
98.35	93.21	99.59	69.97	25.98	38.02	33.26	79.42	45.06	22.42	Male	S. olivacea
98.39	93.07	99.48	66.11	24.54	35.92	31.42	75.03	42.57	21.18	Male	S. olivacea
98.39	92.53	99.73	68.96	25.6	37.47	32.78	78.27	44.41	22.09	Male	S. olivacea
98.45	91.84	98.67	68.21	25.33	37.06	32.42	77.43	43.93	21.86	Male	S. olivacea
98.45	91.01	100.37	71.4	26.51	38.79	33.94	81.04	45.98	22.88	Male	S. olivacea
98.48	90.19	98.65	71.63	26.6	38.92	34.05	81.31	46.13	22.95	Male	S. olivacea
98.51	91.9	99.89	68.8	25.54	37.38	32.7	78.1	44.31	22.05	Male	S. olivacea
98.72	91.76	100.44	66.6	24.73	36.19	31.66	75.6	42.89	21.34	Male	S. olivacea
98.74	92.7	100.93	66.4	24.65	36.08	31.56	75.36	42.76	21.27	Male	S. olivacea
98.76	92.66	99.92	69.37	25.75	37.69	32.97	78.74	44.68	22.23	Male	S. olivacea
98.77	92.7	99.92	72.15	26.79	39.21	34.3	81.9	46.47	23.12	Male	S. olivacea
98.91	90.92	99.46	66.89	24.84	36.35	31.8	75.93	43.08	21.43	Male	S. olivacea
98.96	90.85	100.94	69.13	25.67	37.56	32.86	78.47	44.52	22.15	Male	S. olivacea
98.97	92.63	101.06	70.92	26.33	38.53	33.71	80.5	45.67	22.72	Male	S. olivacea
99.02	92.57	99.34	68.99	25.62	37.49	32.79	78.31	44.44	22.11	Male	S. olivacea
99.15	92.21	99.93	72.47	26.91	39.38	34.44	82.26	46.67	23.22	Male	S. olivacea
99.16	91.28	100.99	65.92	24.47	35.82	31.33	74.82	42.45	21.12	Male	S. olivacea
99.17	91.6	100.21	68.82	25.55	37.4	32.71	78.12	44.33	22.05	Male	S. olivacea
99.25	92.96	101.33	68.73	25.52	37.34	32.67	78.01	44.26	22.02	Male	S. olivacea
99.35	91.82	99.44	66.92	24.84	36.36	31.81	75.96	43.1	21.44	Male	S. olivacea
99.36	92.09	100	66.13	24.55	35.93	31.43	75.07	42.59	21.19	Male	S. olivacea
99.43	92.23	101.34	70.53	26.19	38.32	33.52	80.06	45.42	22.6	Male	S. olivacea
99.45	93.28	101.12	70.48	26.17	38.29	33.5	80	45.39	22.58	Male	S. olivacea
99.6	93.07	101.77	67.13	24.92	36.48	31.91	76.2	43.24	21.51	Male	S. olivacea
99.61	93.55	100.74	71.05	26.38	38.61	33.77	80.65	45.76	22.77	Male	S. olivacea
99.65	92.96	99.98	67.75	25.15	36.81	32.2	76.9	43.63	21.71	Male	S. olivacea
99.65	92.71	100.46	70.17	26.05	38.13	33.35	79.64	45.19	22.48	Male	S. olivacea
99.74	91.53	101.15	68.55	25.45	37.25	32.58	77.81	44.15	21.97	Male	S. olivacea
99.81	91.97	100.96	67.67	25.12	36.77	32.17	76.81	43.58	21.68	Male	S. olivacea
99.86	91.74	101.46	67.72	25.14	36.8	32.19	76.87	43.62	21.7	Male	S. olivacea
99.91	93.28	101.49	71.83	26.67	39.03	34.14	81.53	46.26	23.01	Male	S. olivacea
99.97	93.13	101.08	65.99	24.5	35.85	31.36	74.9	42.5	21.14	Male	S. olivacea
99.98	92.68	101.79	67.73	25.15	36.8	32.19	76.88	43.62	21.7	Male	S. olivacea
99.99	93.6	100.4	69.01	25.62	37.5	32.8	78.33	44.44	22.11	Male	S. olivacea
100.15	92.54	101.44	69.63	25.85	37.83	33.09	79.03	44.84	22.31	Male	S. olivacea
100.18	92.54	102.37	68.29	25.35	37.11	32.46	77.52	43.98	21.88	Male	S. olivacea
100.31	93.73	101	68.77	25.53	37.36	32.68	78.05	44.29	22.03	Male	S. olivacea
100.38	94.06	101.12	69.23	25.7	37.62	32.91	78.59	44.59	22.18	Male	S. olivacea
100.4	94.39	102.51	69.37	25.76	37.69	32.97	78.74	44.68	22.23	Male	S. olivacea
100.46	93.37	102.54	67.39	25.02	36.62	32.03	76.49	43.4	21.59	Male	S. olivacea
100.47	94.44	102.32	68.18	25.31	37.04	32.4	77.38	43.91	21.84	Male	S. olivacea
100.49	94.63	101.92	72.16	26.79	39.21	34.3	81.91	46.47	23.12	Male	S. olivacea
100.52	93.36	101.87	66.53	24.7	36.15	31.62	75.51	42.85	21.32	Male	S. olivacea
100.54	92.84	102.63	67.6	25.1	36.73	32.13	76.74	43.54	21.66	Male	S. olivacea
100.6	94.58	101.85	71.52	26.55	38.86	33.99	81.18	46.06	22.92	Male	S. olivacea
100.61	93.04	101.55	66.65	24.75	36.22	31.68	75.66	42.93	21.36	Male	S. olivacea
100.65	92.37	101.58	68.3	25.36	37.11	32.46	77.53	43.99	21.88	Male	S. olivacea
100.67	94.54	101.68	71.84	26.67	39.03	34.14	81.54	46.27	23.02	Male	S. olivacea
100.7	94.79	102.52	71.19	26.43	38.68	33.84	80.81	45.85	22.81	Male	S. olivacea
100.74	93.71	101.06	67.33	25	36.58	32	76.42	43.36	21.57	Male	S. olivacea
100.81	93.56	102.3	70.2	26.06	38.14	33.37	79.68	45.21	22.49	Male	S. olivacea
100.82	93.35	102.62	66.63	24.74	36.2	31.67	75.63	42.91	21.35	Male	S. olivacea
100.87	92.74	101.67	70.23	26.07	38.16	33.38	79.71	45.23	22.5	Male	S. olivacea
100.98	94.67	101.3	68.04	25.26	36.97	32.34	77.23	43.82	21.8	Male	S. olivacea
101.07	93.07	102.24	67.3	24.99	36.57	31.99	76.39	43.34	21.56	Male	S. olivacea
101.1	93.05	102.17	67.84	25.19	36.86	32.25	77.01	43.69	21.74	Male	S. olivacea
101.14	94.39	103.2	67.29	24.98	36.56	31.98	76.38	43.34	21.56	Male	S. olivacea
101.16	93.48	101.82	67.22	24.96	36.53	31.95	76.3	43.29	21.54	Male	S. olivacea
101.26	93.7	101.35	66.5	24.69	36.13	31.61	75.48	42.83	21.31	Male	S. olivacea
101.28	95.47	102.7	68.9	25.58	37.44	32.75	78.2	44.37	22.08	Male	S. olivacea
101.39	95.36	102.73	70.35	26.12	38.23	33.44	79.85	45.31	22.54	Male	S. olivacea
101.41	93.24	102.33	70.63	26.22	38.37	33.57	80.16	45.49	22.63	Male	S. olivacea
101.51	95.28	102.42	70.4	26.14	38.25	33.46	79.91	45.34	22.56	Male	S. olivacea
101.59	95.65	101.9	70.39	26.13	38.25	33.46	79.9	45.34	22.56	Male	S. olivacea
101.6	94.58	102.45	72.56	26.94	39.43	34.49	82.36	46.73	23.25	Male	S. olivacea
101.61	95.12	101.97	69.62	25.85	37.83	33.09	79.02	44.84	22.31	Male	S. olivacea
101.67	95.59	102.5	68.69	25.5	37.32	32.65	77.97	44.24	22.01	Male	S. olivacea
101.67	95.59	102.4	67.05	24.9	36.43	31.87	76.11	43.19	21.49	Male	S. olivacea
101.71	93.97	102.83	66.19	24.58	35.97	31.46	75.13	42.63	21.21	Male	S. olivacea
101.74	94.09	103.64	71.13	26.41	38.65	33.81	80.74	45.81	22.79	Male	S. olivacea
101.77	94.46	103.27	70.06	26.01	38.07	33.3	79.53	45.12	22.45	Male	S. olivacea
101.79	95.03	102.8	69.04	25.63	37.51	32.82	78.37	44.46	22.12	Male	S. olivacea
101.81	94.86	102.66	66.37	24.64	36.06	31.54	75.33	42.74	21.27	Male	S. olivacea
101.9	93.61	104.08	67	24.87	36.4	31.84	76.05	43.15	21.47	Male	S. olivacea
101.99	93.96	102.56	72.43	26.89	39.35	34.42	82.21	46.64	23.21	Male	S. olivacea
102.11	94.35	102.31	72.88	27.06	39.6	34.64	82.72	46.94	23.35	Male	S. olivacea
102.3	94.8	102.62	72.18	26.8	39.22	34.31	81.93	46.49	23.13	Male	S. olivacea
102.5	94.64	103.88	72.63	26.97	39.46	34.52	82.44	46.78	23.27	Male	S. olivacea
103.25	96.59	105.36	76.5	28.4	41.57	36.36	86.84	49.27	24.51	Male	S. olivacea
103.31	96.89	104.67	72.32	26.85	39.3	34.38	82.09	46.58	23.17	Male	S. olivacea
103.38	96.44	105.34	74.08	27.5	40.25	35.21	84.08	47.71	23.74	Male	S. olivacea
103.43	95.94	103.96	75.81	28.15	41.19	36.03	86.05	48.82	24.29	Male	S. olivacea
104.46	98.38	106.33	71.15	26.42	38.66	33.82	80.76	45.82	22.8	Male	S. olivacea
104.59	96.8	106.74	78.91	29.3	42.88	37.51	89.57	50.82	25.29	Male	S. olivacea
105.64	98.86	107.8	75.9	28.18	41.24	36.08	86.15	48.88	24.32	Male	S. olivacea
105.76	99.29	106.04	74.05	27.49	40.24	35.2	84.06	47.69	23.73	Male	S. olivacea
105.86	99.3	107.44	76.82	28.52	41.74	36.52	87.2	49.48	24.62	Male	S. olivacea
105.97	98.43	107.71	77.98	28.95	42.37	37.06	88.51	50.22	24.99	Male	S. olivacea
106.15	99.34	106.18	77.21	28.66	41.95	36.7	87.64	49.72	24.74	Male	S. olivacea
106.22	99.36	106.7	74.34	27.6	40.39	35.33	84.38	47.88	23.82	Male	S. olivacea
106.42	99.34	108.34	72.83	27.04	39.57	34.61	82.66	46.9	23.33	Male	S. olivacea
106.63	99.09	107.79	79.26	29.43	43.06	37.67	89.96	51.04	25.4	Male	S. olivacea
106.68	99.1	106.67	75.88	28.17	41.23	36.07	86.13	48.87	24.31	Male	S. olivacea
107.15	100.13	107.32	80.24	29.79	43.6	38.14	91.07	51.67	25.71	Male	S. olivacea
107.18	99.56	107.8	76.12	28.26	41.36	36.18	86.4	49.02	24.39	Male	S. olivacea
107.21	101.24	108.94	74.61	27.7	40.54	35.46	84.68	48.05	23.91	Male	S. olivacea
107.38	100.88	109.23	78.15	29.01	42.46	37.14	88.7	50.33	25.04	Male	S. olivacea
107.84	101.39	109.42	78.78	29.25	42.8	37.44	89.42	50.73	25.24	Male	S. olivacea
108.32	102.35	108.82	80.36	29.84	43.66	38.2	91.22	51.76	25.75	Male	S. olivacea
108.42	102.39	110.58	78.99	29.33	42.92	37.55	89.66	50.87	25.31	Male	S. olivacea
108.52	101.98	109.26	78.3	29.07	42.54	37.22	88.87	50.43	25.09	Male	S. olivacea
108.63	101.15	109.22	78.36	29.09	42.58	37.25	88.95	50.47	25.11	Male	S. olivacea
108.7	102.17	110.16	75.57	28.06	41.06	35.92	85.78	48.67	24.21	Male	S. olivacea
108.73	100.49	109.36	78.98	29.32	42.92	37.54	89.65	50.87	25.31	Male	S. olivacea
108.88	101.74	109.5	71.23	26.44	38.7	33.85	80.85	45.87	22.82	Male	S. olivacea
109.06	100.85	110.65	73.58	27.32	39.98	34.97	83.52	47.39	23.58	Male	S. olivacea
109.4	101.24	110.97	80.36	29.84	43.67	38.2	91.22	51.76	25.75	Male	S. olivacea
109.44	101.2	110.68	71.03	26.37	38.6	33.76	80.63	45.75	22.76	Male	S. olivacea
109.51	102.44	111.51	70.88	26.32	38.51	33.69	80.46	45.65	22.71	Male	S. olivacea
109.99	101.73	111.22	80.1	29.74	43.52	38.07	90.92	51.59	25.67	Male	S. olivacea
110.06	101.9	112.19	76.24	28.31	41.43	36.24	86.54	49.1	24.43	Male	S. olivacea
110.63	102.96	112.5	71.16	26.42	38.66	33.82	80.77	45.83	22.8	Male	S. olivacea
110.79	102.95	112.25	72.26	26.83	39.26	34.35	82.02	46.54	23.15	Male	S. olivacea
110.81	102.84	111.17	77.02	28.6	41.85	36.61	87.43	49.61	24.68	Male	S. olivacea
110.85	103.31	113.03	73.13	27.15	39.74	34.76	83.01	47.1	23.43	Male	S. olivacea
111.08	102.41	112.15	78.57	29.17	42.69	37.35	89.19	50.6	25.18	Male	S. olivacea
111.3	103.14	111.5	70.81	26.29	38.47	33.66	80.37	45.6	22.69	Male	S. olivacea
111.34	104.12	113.17	76.26	28.31	41.43	36.25	86.56	49.11	24.43	Male	S. olivacea
111.44	103.48	111.93	79.42	29.49	43.15	37.75	90.15	51.15	25.45	Male	S. olivacea
111.46	103.53	111.81	78.32	29.08	42.55	37.22	88.89	50.44	25.09	Male	S. olivacea
111.55	103.76	113.09	73.99	27.47	40.2	35.17	83.98	47.65	23.71	Male	S. olivacea
111.92	103.45	113.98	73.82	27.41	40.11	35.09	83.8	47.55	23.65	Male	S. olivacea
112.09	104.54	112.88	71.44	26.52	38.82	33.96	81.09	46.01	22.89	Male	S. olivacea
112.12	104.35	113.75	73.68	27.35	40.03	35.02	83.63	47.45	23.61	Male	S. olivacea
112.12	103.84	113.33	77.89	28.92	42.32	37.02	88.41	50.16	24.96	Male	S. olivacea
112.4	105.14	112.42	78.26	29.05	42.52	37.2	88.83	50.4	25.07	Male	S. olivacea
112.88	104.22	114.54	76	28.22	41.29	36.12	86.26	48.94	24.35	Male	S. olivacea
112.93	105.36	114.51	73.01	27.11	39.67	34.7	82.87	47.02	23.39	Male	S. olivacea
112.94	105.29	114.27	77.65	28.83	42.19	36.91	88.14	50.01	24.88	Male	S. olivacea
113.08	105.81	115.25	72.37	26.87	39.32	34.4	82.15	46.61	23.19	Male	S. olivacea
113.34	105.07	113.5	71.71	26.62	38.96	34.08	81.39	46.18	22.98	Male	S. olivacea
113.52	105.71	115.24	79.92	29.67	43.42	37.99	90.71	51.47	25.61	Male	S. olivacea
113.6	106.03	114.29	73.57	27.31	39.98	34.97	83.51	47.38	23.57	Male	S. olivacea
113.76	105.23	115.94	74.86	27.79	40.68	35.58	84.97	48.21	23.99	Male	S. olivacea
113.77	106.2	115.31	70.67	26.24	38.4	33.59	80.22	45.52	22.65	Male	S. olivacea
113.77	106.49	114.21	81.44	30.24	44.25	38.71	92.44	52.45	26.09	Male	S. olivacea
114.63	106.98	115.33	79.44	29.49	43.16	37.76	90.17	51.16	25.45	Male	S. olivacea
114.93	106.17	115.07	72.92	27.07	39.62	34.66	82.77	46.97	23.37	Male	S. olivacea
115.03	107.12	116.28	72.16	26.79	39.21	34.3	81.91	46.48	23.12	Male	S. olivacea
115.17	107.87	115.62	77.3	28.7	42	36.74	87.74	49.78	24.77	Male	S. olivacea
115.22	107.33	117.03	80.99	30.07	44.01	38.49	91.93	52.16	25.95	Male	S. olivacea
115.23	107	115.82	70.87	26.31	38.51	33.69	80.44	45.64	22.71	Male	S. olivacea
115.24	107.55	115.26	79.26	29.43	43.07	37.67	89.97	51.05	25.4	Male	S. olivacea
115.26	107.21	116.65	79.66	29.57	43.28	37.86	90.42	51.3	25.52	Male	S. olivacea
115.32	107.59	116.46	71.42	26.52	38.81	33.95	81.07	46	22.88	Male	S. olivacea
115.48	107.41	116.22	70.07	26.01	38.07	33.3	79.53	45.13	22.45	Male	S. olivacea
115.48	108.13	117.17	79.4	29.48	43.14	37.74	90.12	51.13	25.44	Male	S. olivacea
115.51	108.26	115.86	71.19	26.43	38.68	33.84	80.81	45.85	22.81	Male	S. olivacea
115.61	106.98	117.49	77.09	28.62	41.89	36.64	87.51	49.65	24.7	Male	S. olivacea
116.01	108.75	116.34	81.04	30.09	44.03	38.52	91.98	52.19	25.97	Male	S. olivacea
116.01	107.49	116.26	78.51	29.15	42.66	37.31	89.11	50.56	25.16	Male	S. olivacea
116.02	107.98	117.68	78.98	29.32	42.92	37.54	89.65	50.87	25.31	Male	S. olivacea
116.07	107.5	117.46	74.08	27.5	40.25	35.21	84.08	47.71	23.74	Male	S. olivacea
116.25	108.08	117.95	71.31	26.47	38.74	33.89	80.94	45.92	22.85	Male	S. olivacea
116.29	109.08	117.96	75.71	28.11	41.14	35.99	85.94	48.76	24.26	Male	S. olivacea
116.32	108.03	117.7	71.11	26.4	38.64	33.8	80.71	45.8	22.78	Male	S. olivacea
116.34	107.91	116.74	71.1	26.4	38.63	33.79	80.7	45.79	22.78	Male	S. olivacea
116.52	107.94	117.27	76.88	28.54	41.77	36.54	87.26	49.51	24.63	Male	S. olivacea
116.6	109.38	118.54	77.43	28.75	42.07	36.8	87.88	49.87	24.81	Male	S. olivacea
116.82	108.7	117.33	75.78	28.13	41.17	36.02	86.01	48.8	24.28	Male	S. olivacea
116.89	108.21	118.04	75.9	28.18	41.24	36.07	86.15	48.88	24.32	Male	S. olivacea
116.95	108.86	117.04	79.22	29.41	43.05	37.66	89.92	51.02	25.38	Male	S. olivacea
116.96	109.67	117.27	77.42	28.74	42.06	36.8	87.87	49.86	24.81	Male	S. olivacea
117.08	109.81	118.59	81.46	30.24	44.26	38.72	92.46	52.46	26.1	Male	S. olivacea
117.35	109.3	119.42	71.59	26.58	38.9	34.03	81.26	46.11	22.94	Male	S. olivacea
117.72	109.37	119.33	79.71	29.59	43.31	37.89	90.48	51.34	25.54	Male	S. olivacea
117.82	109.26	118.13	71.36	26.49	38.77	33.92	81	45.96	22.87	Male	S. olivacea
117.86	110.46	119.04	76.6	28.44	41.62	36.41	86.94	49.33	24.54	Male	S. olivacea
117.87	110.19	118.38	83.12	30.86	45.16	39.51	94.35	53.53	26.63	Male	S. olivacea
117.9	109.12	118.37	89.16	33.1	48.45	42.38	101.21	57.42	28.57	Male	S. olivacea
118.16	110.71	118.5	79.23	29.41	43.05	37.66	89.93	51.03	25.39	Male	S. olivacea
118.2	109.66	119.66	80.69	29.96	43.84	38.35	91.58	51.96	25.85	Male	S. olivacea
118.28	110.21	120.2	88.5	32.86	48.08	42.06	100.45	56.99	28.36	Male	S. olivacea
118.41	110.54	120.1	84.35	31.32	45.83	40.09	95.75	54.33	27.03	Male	S. olivacea
118.57	109.95	119.09	82.05	30.46	44.58	39	93.14	52.85	26.29	Male	S. olivacea
118.69	110.13	119.44	81.3	30.18	44.17	38.64	92.28	52.36	26.05	Male	S. olivacea
118.74	110.84	118.97	81.82	30.38	44.46	38.89	92.88	52.7	26.22	Male	S. olivacea
118.98	110.79	120.97	83.14	30.87	45.17	39.52	94.37	53.54	26.64	Male	S. olivacea
119.36	110.63	121.35	82.9	30.78	45.04	39.4	94.09	53.39	26.56	Male	S. olivacea
119.81	111.54	120.5	86.71	32.19	47.12	41.22	98.43	55.85	27.78	Male	S. olivacea
120.74	112.53	121.49	80.1	29.74	43.52	38.07	90.92	51.59	25.66	Male	S. olivacea
121.17	112.83	121.48	86.41	32.08	46.95	41.07	98.09	55.65	27.69	Male	S. olivacea
121.32	113.23	122.86	82.97	30.8	45.08	39.44	94.18	53.44	26.59	Male	S. olivacea
121.66	114.46	123.46	80.8	30	43.9	38.41	91.72	52.04	25.89	Male	S. olivacea
123.28	114.74	125.47	81.64	30.31	44.36	38.8	92.67	52.58	26.16	Male	S. olivacea
123.81	116.56	124.69	82.41	30.6	44.78	39.17	93.54	53.07	26.41	Male	S. olivacea
124.25	115.64	124.91	82.41	30.6	44.78	39.17	93.54	53.07	26.4	Male	S. olivacea
124.43	115.64	125	84.16	31.25	45.73	40	95.53	54.2	26.97	Male	S. olivacea
124.89	116.93	126.76	85.66	31.8	46.54	40.71	97.23	55.17	27.45	Male	S. olivacea
125.11	117.27	126.03	88.25	32.76	47.95	41.95	100.17	56.84	28.28	Male	S. olivacea
125.52	117.97	125.59	81.25	30.17	44.15	38.62	92.23	52.33	26.04	Male	S. olivacea
125.55	117.2	126.2	84.99	31.55	46.18	40.4	96.47	54.74	27.23	Male	S. olivacea
125.62	117.27	127.35	87.66	32.55	47.63	41.66	99.5	56.46	28.09	Male	S. olivacea
125.88	118.47	127.34	87.7	32.56	47.65	41.68	99.54	56.48	28.1	Male	S. olivacea
125.91	118.4	125.94	87.37	32.44	47.47	41.53	99.17	56.27	27.99	Male	S. olivacea
126.55	119.32	127.92	84.45	31.36	45.89	40.14	95.86	54.39	27.06	Male	S. olivacea
127.08	119.72	127.12	82.31	30.56	44.73	39.12	93.43	53.01	26.38	Male	S. olivacea
127.16	118.89	128.34	88.71	32.94	48.2	42.17	100.7	57.13	28.43	Male	S. olivacea
127.23	119.15	128.39	88.95	33.02	48.33	42.28	100.96	57.29	28.5	Male	S. olivacea
127.35	118.86	127.47	84.78	31.47	46.06	40.29	96.23	54.6	27.16	Male	S. olivacea
127.59	119.03	128.81	85.88	31.88	46.66	40.82	97.47	55.31	27.52	Male	S. olivacea
127.61	118.85	128.13	79.7	29.59	43.3	37.88	90.46	51.33	25.54	Male	S. olivacea
127.96	119.59	129.05	81.44	30.24	44.25	38.71	92.44	52.45	26.09	Male	S. olivacea
128.69	121.32	128.81	79.14	29.38	43	37.61	89.83	50.97	25.36	Male	S. olivacea
128.81	120.32	130.79	80.04	29.72	43.49	38.05	90.86	51.55	25.65	Male	S. olivacea
129.34	120.78	130.81	83.37	30.95	45.3	39.63	94.63	53.69	26.71	Male	S. olivacea
129.61	122.37	129.94	88.91	33.01	48.31	42.26	100.92	57.26	28.49	Male	S. olivacea
129.72	121.41	130.04	82.26	30.54	44.69	39.1	93.37	52.98	26.36	Male	S. olivacea
130.42	122.69	131.77	91	33.79	49.45	43.25	103.29	58.61	29.16	Male	S. olivacea
130.8	122.44	132.25	90.53	33.61	49.19	43.03	102.76	58.31	29.01	Male	S. olivacea
131.2	123.15	132.02	90.29	33.52	49.06	42.91	102.48	58.15	28.93	Male	S. olivacea
131.29	123.75	131.73	95.03	35.28	51.64	45.17	107.87	61.21	30.45	Male	S. olivacea
131.66	122.94	131.71	97.91	36.35	53.2	46.54	111.14	63.06	31.37	Male	S. olivacea
132.3	124.9	134.08	97.84	36.33	53.16	46.5	111.06	63.01	31.35	Male	S. olivacea
132.62	124.06	134.45	90.01	33.42	48.91	42.78	102.17	57.97	28.84	Male	S. olivacea
132.95	125.57	135.09	92.13	34.21	50.06	43.79	104.58	59.34	29.52	Male	S. olivacea
133.52	124.95	134.02	91.02	33.79	49.46	43.26	103.31	58.62	29.16	Male	S. olivacea
133.64	126.04	134.9	89.35	33.17	48.55	42.47	101.42	57.55	28.63	Male	S. olivacea
133.87	125.1	135.51	95.27	35.37	51.77	45.28	108.14	61.36	30.53	Male	S. olivacea
134.15	126.43	136.25	95.86	35.59	52.09	45.56	108.81	61.74	30.72	Male	S. olivacea
134.77	126.84	136.39	95.6	35.49	51.94	45.44	108.51	61.57	30.63	Male	S. olivacea
135.41	127.49	136.47	95.22	35.35	51.74	45.26	108.08	61.33	30.51	Male	S. olivacea
135.83	128.32	136.05	94.42	35.06	51.3	44.88	107.17	60.81	30.25	Male	S. olivacea
136.17	128.72	138.09	97.46	36.18	52.96	46.32	110.62	62.77	31.23	Male	S. olivacea
136.57	128.83	138.1	91.79	34.08	49.87	43.63	104.18	59.11	29.41	Male	S. olivacea
136.97	129.02	137.17	96.98	36.01	52.7	46.1	110.08	62.46	31.08	Male	S. olivacea
137.16	129.91	138.73	97.49	36.2	52.97	46.34	110.66	62.79	31.24	Male	S. olivacea
137.75	130.33	138.92	92.67	34.4	50.35	44.04	105.18	59.68	29.69	Male	S. olivacea
137.92	129.52	138.22	90.89	33.74	49.39	43.2	103.17	58.54	29.12	Male	S. olivacea
138.26	129.65	138.59	94.6	35.12	51.4	44.96	107.38	60.92	30.31	Male	S. olivacea
138.3	130.92	138.69	92.52	34.35	50.27	43.97	105.02	59.59	29.64	Male	S. olivacea
139.18	131.56	139.83	90.7	33.68	49.28	43.11	102.95	58.42	29.06	Male	S. olivacea
139.99	132.63	141.39	89.97	33.4	48.89	42.77	102.13	57.95	28.83	Male	S. olivacea
140.06	132.46	140.26	97.7	36.27	53.09	46.44	110.9	62.92	31.31	Male	S. olivacea
140.27	132.91	140.55	96.77	35.93	52.58	45.99	109.84	62.32	31.01	Male	S. olivacea
140.46	131.95	142.38	94.43	35.06	51.31	44.88	107.18	60.81	30.26	Male	S. olivacea
140.52	133.22	141.27	97.06	36.04	52.74	46.13	110.17	62.51	31.1	Male	S. olivacea
140.91	132.9	142.03	94.2	34.97	51.19	44.78	106.93	60.67	30.18	Male	S. olivacea
141.1	134.1	142.71	96.54	35.84	52.46	45.89	109.58	62.18	30.93	Male	S. olivacea
141.22	133.66	141.35	93.1	34.57	50.59	44.25	105.68	59.96	29.83	Male	S. olivacea
142.02	132.56	143.56	89.44	33.21	48.6	42.51	101.52	57.6	28.66	Male	S. olivacea
142.22	133.23	143.34	90.76	33.7	49.31	43.14	103.02	58.45	29.08	Male	S. olivacea
142.49	134.52	144.38	94.16	34.96	51.16	44.75	106.88	60.64	30.17	Male	S. olivacea
142.96	134.6	144.19	89.89	33.37	48.84	42.72	102.03	57.89	28.8	Male	S. olivacea
98.02	91.56	96.86	61.55	25.27	34.72	34.29	73.74	41.57	20.08	Male	S. paramamosain
98.07	90.91	95.84	62	23.75	33.6	34.02	70.99	38.21	19.97	Male	S. paramamosain
98.29	91.52	96.6	62.91	24.46	33.09	34.13	72.6	39.19	19.97	Male	S. paramamosain
98.33	92.47	97.27	62.4	25.32	32.22	34.29	70.46	40.36	18.91	Male	S. paramamosain
98.39	92.76	96.29	66.46	25.32	32.22	35.27	70.85	39.6	20.04	Male	S. paramamosain
98.39	92.49	96.93	62.79	25.56	34.03	32.54	74.7	38.66	19.68	Male	S. paramamosain
98.47	91.4	97.44	64.56	25.13	32.99	33.59	74.9	41.26	20.58	Male	S. paramamosain
98.47	91.81	97.49	64.65	24.87	33.3	34.77	72.93	39.71	19.66	Male	S. paramamosain
98.47	92.89	97.31	66.97	25.07	33.56	35.05	72.81	40.79	20.13	Male	S. paramamosain
98.5	92.64	96.81	65.99	25.14	33.28	33.75	76.91	38.79	19.84	Male	S. paramamosain
98.55	93.34	96.95	62.12	25.13	33.7	32.95	73.47	38.44	19.48	Male	S. paramamosain
98.67	91.83	96.45	63.85	25.27	34.48	33.42	71.67	39.92	20.37	Male	S. paramamosain
98.68	92.41	97.21	66.66	24.99	32.83	33	75.47	40.87	20.34	Male	S. paramamosain
98.69	91.8	97.82	65.99	25.64	32.93	33.5	76.49	38.49	19.3	Male	S. paramamosain
98.72	92.68	96.62	62.79	24.72	33.7	33.93	72.76	39.77	19.38	Male	S. paramamosain
98.72	92.69	97.71	61.59	24.09	32.45	35.27	76.44	41.01	19.9	Male	S. paramamosain
98.72	93.17	96.56	61.94	23.77	34.55	34.15	75.52	38.97	19.16	Male	S. paramamosain
98.79	92.52	97.93	63.96	25.84	33.73	34.85	76.02	40.99	18.93	Male	S. paramamosain
98.81	92.92	96.91	62.57	25.67	34.68	34.18	73.25	41.42	20.63	Male	S. paramamosain
98.82	91.74	96.76	65.79	24.53	32.66	32.6	70.45	40.11	19.79	Male	S. paramamosain
98.84	91.86	96.99	66.91	24.75	35.19	33.65	76.3	41.6	20.49	Male	S. paramamosain
98.85	93.11	97	62.7	25.91	33.63	32.54	73.54	38.91	19.74	Male	S. paramamosain
98.87	92.18	97.49	64.78	25.96	34.43	33.88	72.82	39.43	19.53	Male	S. paramamosain
98.87	93.95	97.89	65.4	24.22	34	33.18	70.7	38.83	19.92	Male	S. paramamosain
98.88	93.84	97.27	61.94	24.13	34	34.2	73.76	38.49	18.99	Male	S. paramamosain
98.89	92.85	97.65	63.85	24.64	33.41	34.02	76.6	38.15	20.6	Male	S. paramamosain
98.98	93.36	97.6	62.98	24.01	33.08	32.6	71.15	41.05	19.48	Male	S. paramamosain
99.13	94.01	97.23	67.03	24.09	32.71	33.64	72.22	40.26	20.39	Male	S. paramamosain
99.17	93.27	98.23	64.62	25.1	32.31	33.3	70.95	40.95	19.27	Male	S. paramamosain
99.31	93.49	97.85	61.39	25.16	34.1	33.55	74.95	39.2	19.26	Male	S. paramamosain
99.36	94.14	98.43	63.29	25.15	32.97	33.14	75.82	40.85	19.2	Male	S. paramamosain
99.36	93.82	97.46	62.22	25.74	33.25	32.83	71.78	39.85	20.19	Male	S. paramamosain
99.38	93.7	98.42	66.13	23.92	33.55	32.81	72.84	40.2	20.33	Male	S. paramamosain
99.41	93.56	98.58	63.07	25.3	33.04	33.18	70.92	39.78	19.47	Male	S. paramamosain
99.42	93.87	98.39	63.21	24.88	33.03	34.69	73.57	40.59	19.44	Male	S. paramamosain
99.43	93.95	97.47	67.13	25.84	32.28	33.52	71.79	38.2	20.19	Male	S. paramamosain
99.51	92.4	98.03	62.01	24.36	34.87	33.92	76.71	41.36	19.66	Male	S. paramamosain
99.53	94.33	98.14	66.46	23.89	34.14	34.17	74.15	40.38	18.93	Male	S. paramamosain
99.56	94.29	98.17	62.69	23.87	33.53	33.33	76.08	40.98	19.12	Male	S. paramamosain
99.73	93.8	98.67	66.01	23.85	33.56	34.49	76.49	40.87	19.94	Male	S. paramamosain
99.81	92.75	98.6	66.46	23.84	33.36	34.04	76.73	38.56	19.32	Male	S. paramamosain
99.83	93.88	98.2	63.93	24.47	32.83	33.85	72.88	40.72	19.14	Male	S. paramamosain
99.88	93.59	98.96	63.37	24.33	34.09	33.41	71.66	38.37	20.29	Male	S. paramamosain
99.9	93.3	98.54	62.76	25.5	34.6	34.53	75.11	38.52	20.06	Male	S. paramamosain
99.95	94.06	98.87	66.04	25.27	34.85	34.49	71.17	39.71	20.54	Male	S. paramamosain
99.96	93.43	98.33	67.14	25.69	33.66	34.17	75.66	41.06	19.27	Male	S. paramamosain
99.97	94	98.34	61.69	24.5	32.2	33.97	75.24	38.38	19.57	Male	S. paramamosain
100.06	94.51	98.94	62.46	23.89	33.67	32.92	71.42	39.54	19.2	Male	S. paramamosain
100.06	92.26	99	63.15	24.48	33.22	32.69	70.81	38.86	19.49	Male	S. paramamosain
100.07	91.56	98.95	66.04	25.47	33.61	34.08	71.96	41.63	19.86	Male	S. paramamosain
100.1	93.73	99.19	65.52	25.11	34.22	35.38	72.72	38.63	19.85	Male	S. paramamosain
100.14	91.77	98.24	63.1	24.99	32.96	34.62	76.46	41.58	20.28	Male	S. paramamosain
100.15	93.72	98.34	66.62	25.4	33.59	35.38	70.45	41.23	19.4	Male	S. paramamosain
100.15	93.58	98.37	61.56	24.81	33.84	34.54	76.98	38.96	20.5	Male	S. paramamosain
100.16	92.47	99.11	65.98	24.8	32.67	34.85	75.63	40.21	19.67	Male	S. paramamosain
100.22	92.68	98.8	66.19	23.86	35.05	33.84	71.32	39.13	19.82	Male	S. paramamosain
100.32	91.37	98.46	63.54	25.78	32.59	32.63	75.42	38.75	19.83	Male	S. paramamosain
100.43	94.29	99.17	63.76	24.9	33.97	34.42	75.67	41.36	19.37	Male	S. paramamosain
100.45	93.76	99.15	61.64	24.38	32.48	35.12	75.86	40.46	19.95	Male	S. paramamosain
100.47	92.34	98.93	64.37	25.92	33.27	32.86	75.86	39.97	20.07	Male	S. paramamosain
100.51	92.21	98.94	61.94	25.74	35.04	33.87	71.47	41.22	19.72	Male	S. paramamosain
100.56	92.91	98.91	65.42	24.11	35.18	34.1	73.62	40.66	19	Male	S. paramamosain
100.61	94.19	98.83	61.78	25	35.09	35.31	72.65	38.86	20.5	Male	S. paramamosain
100.62	94.61	98.6	62.11	24.69	33.04	33.91	76.97	41.19	20.46	Male	S. paramamosain
100.66	93.74	99.09	64.27	24.53	32.49	34.88	76.91	39.18	20.03	Male	S. paramamosain
100.69	94.63	98.96	61.51	24.48	33.83	32.96	73.66	40.33	20.24	Male	S. paramamosain
100.71	91.92	99.88	62.69	25.32	35.05	32.73	75.93	41.12	20.11	Male	S. paramamosain
100.72	92.22	99.33	64.49	24.27	33.17	35.41	70.49	38.84	20.27	Male	S. paramamosain
100.9	92.14	99.44	63.93	25.98	34.64	34.89	74.93	40.85	19.5	Male	S. paramamosain
100.95	92.78	98.9	65.48	24.14	32.66	32.47	72.84	39.72	18.86	Male	S. paramamosain
101.02	94.97	100.07	70.59	26.16	33.63	37.89	74.73	43.19	20.77	Male	S. paramamosain
101.02	94.8	99.84	71.36	24.97	34.24	34.65	74.25	44.31	22.39	Male	S. paramamosain
101.12	92.18	99.52	67.71	26.79	36.24	35.52	79.37	41.94	20.94	Male	S. paramamosain
101.13	92.19	99.58	71.86	25.39	34.85	36.99	81.08	43.57	19.99	Male	S. paramamosain
101.15	92.2	100.05	70.8	26.61	36.73	37.27	77.84	44.3	20.87	Male	S. paramamosain
101.17	94.2	99.27	68.85	27.07	37.87	34.61	80.75	42.15	21.48	Male	S. paramamosain
101.22	93.89	99.5	65.27	24.87	34.53	33.67	74.76	39.5	19.83	Male	S. paramamosain
101.4	93.87	99.7	66.32	25.9	37.32	36.34	82.04	40.8	20.78	Male	S. paramamosain
101.42	94.9	100.08	68.63	25.32	35.94	33.9	77.38	40.47	19.72	Male	S. paramamosain
101.51	92.83	99.64	72.72	26.06	33.58	38.05	76.05	44.82	22.17	Male	S. paramamosain
101.6	95.46	100.47	65.38	26.52	34.1	34.2	75.43	45.27	19.67	Male	S. paramamosain
101.69	93.88	100.32	68.43	24.53	37.78	35.57	80.96	43.57	22.25	Male	S. paramamosain
101.73	92.76	100.35	67.47	24.96	36.27	37.69	76.47	40.45	20.51	Male	S. paramamosain
102.37	94.76	101.53	65.23	25.68	34.36	35.16	77.03	40.92	21.38	Male	S. paramamosain
102.4	96.14	100.14	69.65	27.41	37.6	33.99	78.16	41.11	21.76	Male	S. paramamosain
102.44	94.09	100.25	64.09	24.9	34.11	35.73	77.08	42.76	21.75	Male	S. paramamosain
102.55	95.14	100.7	71.16	26.87	34.65	35.67	82.1	44.9	21.54	Male	S. paramamosain
102.59	96.47	100.88	66.6	27.84	36.36	34.72	78.57	43.62	20.02	Male	S. paramamosain
102.78	95.96	101.57	71.25	24.91	37.47	37.74	82.62	42.78	21.37	Male	S. paramamosain
102.94	95.27	101.22	65.64	27.61	35.04	36.71	72.73	44.92	22.13	Male	S. paramamosain
103.11	95.67	101.63	65.06	27.06	37.95	35.42	73.48	43.13	21.13	Male	S. paramamosain
103.14	94.67	101.47	71.34	26.28	36.23	37.36	79.72	42.36	20.49	Male	S. paramamosain
103.21	95.57	101.82	63.91	26.75	34.44	35.33	75.6	39.97	21.37	Male	S. paramamosain
103.25	95.33	101.08	64.55	27.72	35.75	37.13	80.24	44.74	21.64	Male	S. paramamosain
103.54	96.69	102.7	63.33	25.98	37.24	35.59	83.38	42.53	21.09	Male	S. paramamosain
103.79	94.82	101.68	69.92	24.87	36.53	34.48	77.55	44.77	20.07	Male	S. paramamosain
103.86	97.28	102.18	69.14	26.44	35.83	36.74	75.03	43.68	19.58	Male	S. paramamosain
104.06	96.41	102.31	71.06	26.93	34.94	35.78	82.51	42.1	20.34	Male	S. paramamosain
104.19	97.61	102.98	66.47	27.18	34.66	36.18	74.84	39.6	21.14	Male	S. paramamosain
104.21	97.02	102.21	68.88	26.93	36.72	37.12	81.03	39.95	19.56	Male	S. paramamosain
104.39	98.18	102.9	69.02	25.62	37.43	34.51	73.05	42.81	22.12	Male	S. paramamosain
104.47	95.79	103.4	63.79	26.88	37.65	38.08	79.6	41.1	21.59	Male	S. paramamosain
104.59	97.2	102.29	71.69	25.8	34.97	37.41	81.6	41.79	20.53	Male	S. paramamosain
104.75	97.19	103.15	70.08	26.27	36.6	35.47	80.43	45.08	21.06	Male	S. paramamosain
104.76	96.84	103.23	66.87	27.37	37.97	33.62	80.76	40.37	20.99	Male	S. paramamosain
104.81	97.44	103.05	66.75	24.54	34.02	34.25	78.71	42.18	20.8	Male	S. paramamosain
104.81	97.02	102.52	67.65	28.13	34.92	35.74	78.86	43.79	21.95	Male	S. paramamosain
105.12	98.44	104.23	65.73	25.09	37.25	38.16	75.11	43.1	20.06	Male	S. paramamosain
105.65	96.95	103.69	64.66	26.26	34.31	37.51	75.97	39.45	19.53	Male	S. paramamosain
105.77	99.72	104.68	67.03	27.75	35.74	38.34	75.28	42.37	22.16	Male	S. paramamosain
105.78	97.4	103.86	72.78	28.01	37.34	37.34	76.42	41.79	20.44	Male	S. paramamosain
105.9	97.63	104.71	70.56	28.02	33.4	33.67	74.29	41.72	22.2	Male	S. paramamosain
105.95	99	104.8	68.76	27.63	38.04	33.53	82.66	43.46	21.68	Male	S. paramamosain
106.25	98.72	104.05	71.16	25.31	34.8	38.18	80.06	42.28	20.28	Male	S. paramamosain
106.3	97.66	105.19	69.25	25.82	38.06	37.78	72.77	40.28	19.75	Male	S. paramamosain
106.39	98.32	104.14	63.54	27.12	36.37	37.41	73.98	40.47	22.07	Male	S. paramamosain
106.49	98.99	104.66	68.17	27.56	33.19	33.95	81.79	39.64	20.63	Male	S. paramamosain
106.51	98.1	104.54	72.28	28.08	35.04	36	82.63	43.12	20.34	Male	S. paramamosain
106.56	98.41	104.89	68.32	25.14	34.01	34.89	73.91	39.98	19.65	Male	S. paramamosain
106.57	99.33	105.02	65.68	26.54	33.45	34.73	74.09	43.88	21.38	Male	S. paramamosain
106.79	99.38	105.5	70.28	28.12	35.05	38.34	73.79	42.09	22.39	Male	S. paramamosain
107.06	99.98	105.77	64.31	25.69	37.17	35.59	80.92	44.56	20.81	Male	S. paramamosain
107.3	99.49	106.05	64.33	27.27	37.4	34.22	82.91	41.14	22.42	Male	S. paramamosain
107.34	99.46	105.83	66.52	25.3	33.27	34.78	82	39.67	20.82	Male	S. paramamosain
107.57	99.9	106.25	70	28.15	36.48	36.48	78.31	39.42	21.91	Male	S. paramamosain
107.59	101.48	106.19	66.62	25.89	36.12	38.04	76.99	43.43	21.71	Male	S. paramamosain
107.62	100.9	106.23	70.19	26.18	35.39	36.34	73.46	42.1	20.46	Male	S. paramamosain
107.79	101.1	106.92	67.26	25.95	34.09	35.13	83.1	44.74	20.42	Male	S. paramamosain
107.86	101.77	106.73	68.95	27.41	34.21	34.63	81.19	42.35	20.08	Male	S. paramamosain
107.95	100.36	106.76	69.18	25.6	35.73	34.33	79.83	39.88	21.71	Male	S. paramamosain
108	101.05	105.9	69.91	25.02	35.46	37.31	73.97	42.39	21.01	Male	S. paramamosain
108.28	99.59	106.25	70.23	24.9	33.53	34.71	77.57	42.89	21.62	Male	S. paramamosain
108.39	102.19	106.23	64.21	27.38	35.72	36.22	74.28	43.46	22.23	Male	S. paramamosain
108.39	99.48	106.85	67.99	26.92	34.16	34.56	77.98	43.71	20.46	Male	S. paramamosain
108.46	100.11	106.95	66.07	27.17	34.04	36.81	74.26	42.24	21.51	Male	S. paramamosain
108.49	99.75	107.54	64.86	24.77	34.76	33.85	81.78	40.62	20.8	Male	S. paramamosain
108.59	99.87	107.46	69.26	25.74	36.25	34.61	78.84	42.97	19.62	Male	S. paramamosain
108.59	99.74	106.3	66.93	25.77	37.51	34.48	75.99	44.91	21.7	Male	S. paramamosain
108.79	100.51	107.43	72.61	25.04	36.34	38.54	74.81	43.13	21.98	Male	S. paramamosain
108.9	101.71	106.64	63.5	24.83	37.38	34.46	73.06	40.15	19.83	Male	S. paramamosain
109.03	101.56	107.08	68.81	28.19	34.23	35.14	77.96	41.27	22.37	Male	S. paramamosain
109.06	101.82	106.92	68.88	25.8	33.24	38.46	75.72	44.5	19.51	Male	S. paramamosain
109.28	101.05	107.16	69.06	25.08	37.18	33.78	78.18	42.94	19.73	Male	S. paramamosain
109.43	102.39	107.34	69.52	24.57	33.99	38.24	80.56	40.11	19.55	Male	S. paramamosain
109.54	103.3	108.02	69.24	25.79	34.27	33.79	78.23	39.43	19.96	Male	S. paramamosain
109.63	103.49	108.42	63.92	25.71	33.4	34.66	82.25	44.02	22.31	Male	S. paramamosain
109.65	103.49	108.47	72.28	26.56	37.59	34.24	73.18	39.53	22.18	Male	S. paramamosain
109.78	101.18	107.57	72.74	27.53	37.39	34.16	79.29	42.79	21.23	Male	S. paramamosain
110.14	103.96	108.99	73.28	29.41	36.48	40.82	83.84	44.17	24.21	Male	S. paramamosain
110.38	102.74	109.1	73.06	30.07	37.88	40.72	85.12	44.18	23.22	Male	S. paramamosain
110.68	102.16	108.98	75.26	30	40.61	40.08	87.95	45	22.53	Male	S. paramamosain
110.8	102.34	109.17	72.14	28.39	36.71	41.05	89.16	44.66	23.83	Male	S. paramamosain
110.96	103.07	109.59	74.5	27.84	36.62	41.56	89.98	47.62	23.56	Male	S. paramamosain
111.02	102.87	108.78	74.73	29.3	41.25	37.2	86.61	47.56	22.33	Male	S. paramamosain
111.34	104.59	109.46	76.5	29.93	37.52	38.28	90.78	43.98	21.46	Male	S. paramamosain
111.68	105.55	110.86	74.37	30.74	37.62	41.83	89.27	44.59	24.49	Male	S. paramamosain
111.75	104	110.1	74.57	30.08	40.16	36.97	90.97	47.76	23.77	Male	S. paramamosain
111.77	103.23	110.73	74.58	30.6	37.47	41.95	82.28	45.59	21.45	Male	S. paramamosain
111.9	102.99	110.94	72.62	27.38	41.88	36.52	90.8	49.05	23.1	Male	S. paramamosain
112.2	103.54	111.23	71.09	30.74	40.31	37.15	84.66	47.7	23.04	Male	S. paramamosain
112.48	104.12	110.42	74.03	28.02	41.41	37.33	90.81	45.06	21.3	Male	S. paramamosain
112.68	103.59	111.83	79.89	30.39	38.05	40.56	85.77	47.38	23.67	Male	S. paramamosain
112.79	104.64	111.91	74.38	28.35	40.41	36.74	80.76	49.38	23.19	Male	S. paramamosain
112.79	104.23	110.67	72.81	30.28	36.23	38.81	91.92	49.3	21.65	Male	S. paramamosain
113.05	105.99	111.1	74.92	30.12	40.53	37.38	81.82	46.96	22.95	Male	S. paramamosain
113.07	105.16	111.21	76.69	27.57	38.48	36.78	91.87	48.72	22.75	Male	S. paramamosain
113.47	106.31	112.41	74.69	30.35	41.75	36.73	80.08	44.21	24.29	Male	S. paramamosain
113.51	106.71	112.15	73.61	30.39	37.57	40.51	85.04	47.27	23.44	Male	S. paramamosain
113.55	106.72	112.65	71.8	29.25	41.33	37.61	85.77	42.94	22.35	Male	S. paramamosain
113.64	104.87	112.12	75.78	28.52	41.27	41.02	87.62	43.26	21.27	Male	S. paramamosain
113.67	106.69	111.42	76.51	28.48	38.25	40.36	89.55	49.22	21.51	Male	S. paramamosain
113.87	106.02	112.39	77.45	30.51	36.63	39.17	86.21	46.35	23.31	Male	S. paramamosain
114.21	105.04	112.19	76.31	27.26	39.02	39.28	90.71	46.67	21.36	Male	S. paramamosain
114.33	107.14	113.03	76.63	28.18	39.75	40.14	82.32	43.58	21.48	Male	S. paramamosain
114.53	107.3	112.99	71.01	28.74	41.9	39.65	86.66	44.05	22.66	Male	S. paramamosain
114.55	105.53	113.04	69.21	29.1	37.84	37.13	83.98	48.61	24.12	Male	S. paramamosain
114.6	106.07	113.29	79.26	27.46	41.07	38.1	83.3	47.54	22.04	Male	S. paramamosain
114.72	106.91	113.63	71.83	28.87	36.31	40.2	82.37	49.09	22.54	Male	S. paramamosain
114.75	107.21	112.71	71.12	28.44	37.99	37.04	88.16	47.31	21.5	Male	S. paramamosain
114.83	107.27	113.14	77.02	27.86	40.33	39.29	81.35	42.96	24.41	Male	S. paramamosain
115.01	106.54	113	79.2	28.14	41.21	38.03	91.85	44.78	24.23	Male	S. paramamosain
115.05	107.94	113.74	71.36	27.24	37.96	41.97	84.63	44.94	23.88	Male	S. paramamosain
115.11	106.54	113.11	78.38	27.68	37.62	38.67	85.2	49.03	23.16	Male	S. paramamosain
115.2	108.05	113.6	69.47	30.65	40.25	41.12	80.09	48.32	21.37	Male	S. paramamosain
115.49	107.65	114.31	74.63	29.24	38.96	37.95	83.29	45.04	22.11	Male	S. paramamosain
115.57	107.3	114.2	75.27	30.75	41.74	40.35	81.71	44.31	22.73	Male	S. paramamosain
115.61	107.17	113.95	69.69	29.9	36.78	42.25	84.13	49.17	24.57	Male	S. paramamosain
115.66	107.63	114.45	72.51	28.53	37.26	40.01	87.33	48.59	22.44	Male	S. paramamosain
115.73	107.62	114.37	72.45	29.4	37.48	39.09	86.53	47.09	22.19	Male	S. paramamosain
115.97	106.92	114.01	74.34	29.96	40.87	41.27	85.67	43.96	21.55	Male	S. paramamosain
116.17	108.62	114.9	79.14	26.74	41.05	38.34	84.43	48.64	21.95	Male	S. paramamosain
116.22	108.69	114.4	78.83	27.86	37.7	37.47	89.62	49.15	22.9	Male	S. paramamosain
116.33	108.22	114.97	69.21	28.7	38.95	42.23	80.04	47.9	22.93	Male	S. paramamosain
116.48	107.63	114.74	79.95	29.14	39.79	40.99	88.56	46.24	22.04	Male	S. paramamosain
116.53	109.68	115.35	75.85	30.01	40.95	40.78	88.36	43.87	23.8	Male	S. paramamosain
116.63	108.9	114.41	72	26.96	40.29	42.23	79.42	49.19	21.79	Male	S. paramamosain
116.75	108.4	114.61	72.44	28.56	41.74	37.05	79.99	48.44	21.33	Male	S. paramamosain
116.81	109.28	115.79	73.83	27.21	40.82	40.37	82.81	47.57	23.58	Male	S. paramamosain
117	108.8	115.63	78.5	28.84	40.65	40.48	89.3	45.08	23.17	Male	S. paramamosain
117.29	108.71	115.78	72.2	29.09	41.35	36.91	84.51	43.24	24.07	Male	S. paramamosain
117.5	109.31	116.09	72.06	26.77	37.84	40.72	81	44.71	23.56	Male	S. paramamosain
117.8	110.28	115.99	69.39	28.54	40.98	37.56	83.59	45.78	22.71	Male	S. paramamosain
117.89	109.18	116.5	75.94	30.26	41.53	41.62	90.91	47.71	22.32	Male	S. paramamosain
118.05	109.75	117.07	78.4	26.73	39.61	38.45	79.48	47.27	21.65	Male	S. paramamosain
118.19	109.63	116.49	72.44	28.65	38.51	40.97	81.89	45.19	24.51	Male	S. paramamosain
118.24	109.14	116.85	70.74	27.33	38.09	38.33	90.42	46.7	21.33	Male	S. paramamosain
118.31	111.4	117.14	76.99	28.81	38.97	41	81.33	45.9	21.62	Male	S. paramamosain
118.65	110.56	116.6	75.22	30.63	38.06	38.81	81.55	47.89	21.86	Male	S. paramamosain
118.75	111.93	116.83	77.11	28.75	39.8	41.98	80.51	47.15	23.57	Male	S. paramamosain
118.76	110.45	117.45	73.63	27.08	40.71	37.74	80.57	49.65	24.47	Male	S. paramamosain
118.84	110.1	116.68	72.36	30.26	37.19	42.25	87.62	46.35	22.05	Male	S. paramamosain
119.02	110.67	118.13	71.19	28.44	36.44	39.13	90.95	43.89	24.11	Male	S. paramamosain
119.12	111.45	117.69	73.72	30.74	37.88	39.44	90.42	45.23	23.86	Male	S. paramamosain
119.29	111.18	117.23	72.72	27.92	41.39	41.97	89.27	49.07	22.56	Male	S. paramamosain
119.35	111.29	117.68	77.17	29.45	38.5	36.85	80.57	46.35	22.74	Male	S. paramamosain
119.64	110.74	118.54	73.06	28.19	41.01	36.98	85.57	46.7	23.53	Male	S. paramamosain
119.7	112.75	118.42	71.85	28.34	37.16	41.24	80.32	46.72	21.49	Male	S. paramamosain
119.9	111.65	117.86	69.77	26.79	36.84	41.85	89.91	45.39	22.77	Male	S. paramamosain
119.91	112.53	117.67	69.37	30.69	36.27	39.68	90.82	46.38	22.33	Male	S. paramamosain
120.07	111.5	118.03	86.44	30.65	44.95	45.18	94.51	50.94	26.03	Male	S. paramamosain
120.36	111.5	119.1	80.44	31.99	41.06	42.73	87.81	47.05	25.67	Male	S. paramamosain
120.41	111.37	119.44	79.4	30.59	44.59	42.14	92.12	47.56	25.02	Male	S. paramamosain
120.47	112.6	118.2	77.95	32.53	40.8	40.22	93.3	47.08	25.28	Male	S. paramamosain
120.47	113.03	119.6	76.85	30.65	40.55	45.31	89.34	48.91	26.52	Male	S. paramamosain
120.58	112.29	119.69	83.36	32.26	42.43	43.37	94.91	50.73	25.48	Male	S. paramamosain
120.69	113.46	119.23	80.11	31.17	40.32	41.02	88.79	51.97	23.45	Male	S. paramamosain
121.29	113.49	120.24	78.63	32.97	45.14	42.73	88.58	48.89	25.38	Male	S. paramamosain
121.7	113.58	119.41	85.85	30.1	40.45	44.77	97.88	48.03	24.37	Male	S. paramamosain
121.98	114.48	120.41	78.02	31.27	43.41	40.45	98.88	51.57	25.43	Male	S. paramamosain
122.24	114.61	121.26	76.91	30.07	43.64	42.25	94.83	47.6	23.83	Male	S. paramamosain
122.36	113.62	120.26	84.83	31.33	42.45	41.83	91.72	52.97	25.57	Male	S. paramamosain
122.67	113.52	121.06	81.83	29.49	40.75	40.66	91.49	50.17	24.39	Male	S. paramamosain
122.98	114.53	121.05	80.83	30.69	45.15	42.73	86.94	49.93	25.93	Male	S. paramamosain
123.26	115.32	121.95	81.69	31.7	40.82	40.27	91.91	51.47	25.06	Male	S. paramamosain
123.75	114.79	122.38	83.21	30.46	40.24	40.24	90.87	48.8	24.73	Male	S. paramamosain
124.08	114.81	122.49	76.04	29.71	41.35	44.91	88.59	53.48	24.64	Male	S. paramamosain
124.29	116.71	123.32	84.42	32.05	43.68	42.83	94.73	48.98	26.25	Male	S. paramamosain
124.33	116.21	123.26	86.33	32.09	40.22	40.2	91.59	47.38	26.5	Male	S. paramamosain
124.48	116.08	122.85	83.99	32.99	40.24	41.31	89.35	49.53	25.81	Male	S. paramamosain
124.79	116.69	123.61	83.32	32.99	41.06	44.36	86.91	47.61	24.39	Male	S. paramamosain
125.09	117.77	124.05	80.77	30.48	40.98	43.55	89.13	51.03	25.93	Male	S. paramamosain
125.26	117.54	123.81	76.84	29.98	40.64	42.79	88.65	47.7	25.88	Male	S. paramamosain
125.63	116.9	124.12	81.05	33.33	43.06	43.66	86.88	53.65	25.56	Male	S. paramamosain
125.65	117.3	123.57	77.45	32.36	40.19	45.59	92.34	50.59	23.25	Male	S. paramamosain
125.68	117.75	123.5	84.14	30.01	40.81	40.5	94.26	53.57	25.56	Male	S. paramamosain
125.86	117.71	124.98	84.64	30.07	44.65	42.44	97.24	52.07	23.99	Male	S. paramamosain
126	118.29	125.06	84.02	32.93	44.15	45.38	96.3	47.98	26.57	Male	S. paramamosain
126.06	117.76	125.03	76	29.97	40.37	42.32	91.72	49.41	23.74	Male	S. paramamosain
126.38	118.2	124.86	76.88	32.17	39.6	43.26	99.22	48.6	25.88	Male	S. paramamosain
126.58	118.43	124.32	78.57	30.22	42.2	43.31	95.18	51.76	23.23	Male	S. paramamosain
126.75	119.84	125.04	77.74	32.45	42.32	43.45	93.41	52	26.03	Male	S. paramamosain
127.08	119.32	124.81	82.58	32.56	42.25	45.48	94.97	50.66	26.03	Male	S. paramamosain
127.36	118.18	126.34	84.66	29.47	41.91	41.43	97.7	53.74	25.78	Male	S. paramamosain
127.38	120.11	125.41	82.26	33.24	41.15	45.31	92.64	47.86	24.21	Male	S. paramamosain
127.39	119.97	126.44	83.33	32.47	40.22	42.8	90.94	49.47	24.85	Male	S. paramamosain
127.45	120.35	125.79	77.44	32.72	39.68	41.84	98.13	48.66	25.31	Male	S. paramamosain
127.51	119.31	125.38	81.31	31.26	43.16	44.5	97.51	47.1	25.41	Male	S. paramamosain
127.64	119.59	126.32	82.65	33.35	41.13	41.74	98.3	52.39	25.92	Male	S. paramamosain
127.69	120.05	125.42	85.75	30.54	42.63	42.97	96.11	51.04	25.17	Male	S. paramamosain
127.7	118.96	125.7	83.53	29.35	40.78	44.69	89.4	47.35	25.93	Male	S. paramamosain
127.74	119.43	126.71	82.54	29.43	42.42	43.06	87.83	47.3	25.92	Male	S. paramamosain
127.89	119.82	125.75	82.58	31.18	42.05	41.02	92.36	47.42	24.75	Male	S. paramamosain
128.17	120.6	126.92	82.62	31.32	41.52	44.48	96.37	50.83	24.03	Male	S. paramamosain
128.26	121.14	127.38	81.94	33	44.17	40.52	87.92	51.43	23.27	Male	S. paramamosain
128.26	119.32	127.26	79.62	32.96	41.47	41.32	96.53	49.93	25.94	Male	S. paramamosain
128.41	120.32	126.42	77.58	31.34	44.65	40.73	88	49.14	26.13	Male	S. paramamosain
128.71	118.77	127.4	78.36	29.78	43.89	42.93	93.62	51.37	25.41	Male	S. paramamosain
128.93	121.52	127.93	81.68	32.36	44.65	41.87	96.54	53.33	25.74	Male	S. paramamosain
129.01	121.45	127.45	79.12	29.64	42.42	42.27	87.76	52.42	26.16	Male	S. paramamosain
129.02	119.23	127.51	79.12	32.65	40.73	44.35	89.42	52.95	26.36	Male	S. paramamosain
129.03	117.93	127.43	80.87	32.14	41.42	43.14	98.48	52.59	25.41	Male	S. paramamosain
129.38	120.18	127.53	82.92	32.62	43.17	41.45	96.11	48.16	24.72	Male	S. paramamosain
129.51	118.84	127.42	75.71	31.02	40.32	40.99	98.44	46.96	23.83	Male	S. paramamosain
129.54	121.48	127.82	77.05	32.21	40.28	42.8	90.23	51.02	26.47	Male	S. paramamosain
129.59	122.27	128.61	85.96	30.96	43.69	42.7	94.57	53.62	25.68	Male	S. paramamosain
129.93	120.95	128.55	83.55	33.07	41.16	43.5	89.68	51.19	25.46	Male	S. paramamosain
129.98	121.25	127.89	81.81	31.95	41.88	41.68	97.75	53.48	26.08	Male	S. paramamosain
130.59	121.27	129.15	83.85	35.94	46.52	49.07	106.4	55.57	25.96	Male	S. paramamosain
130.64	122.61	128.91	85.8	34.62	43.48	43.6	103.05	56.3	28.15	Male	S. paramamosain
130.72	120.22	128.52	85.75	33.25	46.02	48.54	104.71	55.29	27.33	Male	S. paramamosain
130.92	121	128.68	84.32	35.49	45.79	43.55	94.27	54.05	28.21	Male	S. paramamosain
131.16	123.72	128.96	91.26	31.75	46.4	48.68	97.65	52.68	27.06	Male	S. paramamosain
131.54	122.69	129.34	92.49	33.05	44.69	45.74	106.04	57.65	27.62	Male	S. paramamosain
133.34	123.24	131.13	91.74	34.27	46.36	44.64	98.31	56.45	28.46	Male	S. paramamosain
133.89	126.16	132.97	90.02	35.23	45.12	45.72	99.36	56.8	26.06	Male	S. paramamosain
134.45	125.54	133.15	90.91	33.75	46.78	45.98	103.1	52.13	25.83	Male	S. paramamosain
134.6	124.77	133.78	82.77	34.44	44.17	48.91	98.39	52.05	27.8	Male	S. paramamosain
135.06	125.17	133.89	86.02	33.96	47.44	46.06	102.17	53.24	26.3	Male	S. paramamosain
135.59	126.58	133.71	84.55	34.96	46.89	46.16	97.78	55.21	27.55	Male	S. paramamosain
135.95	126.43	134.91	83.35	32.58	47.31	44.36	97.86	51.04	26.63	Male	S. paramamosain
136.45	128.58	135	89.39	34.1	45.32	48.06	103.83	56.6	25.36	Male	S. paramamosain
136.54	126.61	135.6	82.11	34.45	48.39	46.28	105.64	53.77	25.79	Male	S. paramamosain
136.69	127.54	135.73	89.07	33.61	47.21	44.51	95.4	54.44	26.82	Male	S. paramamosain
136.71	129.27	135.27	92.67	35.65	45.99	46.39	100.09	51.69	26.21	Male	S. paramamosain
136.76	127.08	135.14	92.07	34.68	45.03	46.25	106.05	51.1	28.45	Male	S. paramamosain
136.87	128.1	135.6	90.29	33.65	45.55	47.04	94.65	51.24	26.99	Male	S. paramamosain
136.94	127.37	135.79	88.91	33.42	46.1	45.95	99.82	56.9	25.47	Male	S. paramamosain
138.29	130.29	136.34	90.98	33.64	48.53	48.8	103.29	55.48	25.94	Male	S. paramamosain
138.72	131.48	137.03	84.82	33.9	43.04	43.73	94.37	53.95	28.42	Male	S. paramamosain
139.88	131.76	138.53	86.03	34.26	47.69	47.44	97.41	52.11	27.19	Male	S. paramamosain
95.01	89.41	93.25	66.23	25.54	34.65	32.61	73.54	40.76	18.86	Male	S. paramamosain
95.06	89.71	93.91	60.07	24.59	33.23	32.79	74.11	37.96	19.97	Male	S. paramamosain
95.12	88.39	94.21	66.75	23.5	33.56	34.02	75.7	38.24	18.49	Male	S. paramamosain
95.13	89.59	92.86	64.2	25.58	32.12	32.73	71.99	41.63	19.91	Male	S. paramamosain
95.2	90.26	93.77	64.79	25.19	31.99	35.27	71.08	40.24	18.94	Male	S. paramamosain
95.21	88.02	93.5	60.79	24.31	34.63	32.19	72.46	38.29	20.32	Male	S. paramamosain
95.33	89.42	94.07	66.16	24.97	34.58	32.96	74.01	38.45	20.13	Male	S. paramamosain
95.37	88.39	94.36	62.63	25.6	32.7	34.03	70.28	38.81	20.07	Male	S. paramamosain
95.37	89.65	93.55	64.91	24.01	31.93	34.53	76.72	38.08	18.99	Male	S. paramamosain
95.4	88.86	94.13	65.47	23.54	34.61	33.61	70.65	37.57	18.57	Male	S. paramamosain
95.41	88.61	93.32	61.87	25.33	31.84	32.04	73.32	39.35	20.32	Male	S. paramamosain
95.43	88.43	93.91	63.91	24.24	31.98	34.6	76.86	37.92	19.85	Male	S. paramamosain
95.51	89.53	94.68	62.68	24.71	34.38	31.75	70.09	40.78	20.11	Male	S. paramamosain
95.67	90.41	93.74	63.96	23.94	34.88	35.44	72.18	38.44	18.54	Male	S. paramamosain
95.67	89.31	93.66	65.67	23.84	34.68	34.7	69.25	38.27	19.27	Male	S. paramamosain
95.69	88.57	94.7	65.99	24.61	32.45	34.38	72.76	41.08	19.2	Male	S. paramamosain
95.76	90.3	94.23	67.09	23.46	32.62	35.05	73.33	38.14	19.87	Male	S. paramamosain
95.79	90.69	93.86	62.91	23.29	33.77	33.26	75.68	38.14	20.16	Male	S. paramamosain
95.8	89.59	94.6	62.14	25.63	32.97	32.88	77.09	37.84	19.36	Male	S. paramamosain
95.98	89.92	94.99	62.58	24.49	33.34	34.63	70.41	38.17	18.99	Male	S. paramamosain
96.05	91.08	94.88	66.07	23.72	32.17	34.64	70.89	37.81	19.16	Male	S. paramamosain
96.1	90.62	95.13	60.26	23.65	31.7	32.66	71.5	37.87	19.52	Male	S. paramamosain
96.14	90.95	94.83	62.49	25.49	33.44	35.28	69.27	37.71	19.18	Male	S. paramamosain
96.2	91.17	94.3	65.14	25.84	35.03	32.78	73.39	41.62	20.03	Male	S. paramamosain
96.36	89.19	95.29	63.18	24.88	34.25	32.64	72.77	38.65	20.17	Male	S. paramamosain
96.38	90.06	94.92	66.7	24.16	32.83	33.17	73.12	39.12	20.32	Male	S. paramamosain
96.47	91.06	94.46	62.47	23.45	31.59	32.23	73	38.61	18.58	Male	S. paramamosain
96.53	90.32	94.96	66.98	24.18	34.81	33.19	70.48	40.82	20.61	Male	S. paramamosain
96.55	90.53	95.47	61.13	23.67	34.93	32.14	74.18	39.3	19.38	Male	S. paramamosain
96.63	90.25	94.68	63.07	24.35	32.82	31.81	72.69	40.66	20.49	Male	S. paramamosain
96.64	89.82	95.55	60.99	23.4	34.03	34.82	76.03	40.24	18.69	Male	S. paramamosain
96.66	90.09	95.14	65.43	25.67	32.44	34.89	75.28	39.65	19.13	Male	S. paramamosain
96.76	89.65	95.24	66.12	25.78	34.5	32.27	74.44	38.69	20.37	Male	S. paramamosain
96.82	90.34	95.9	65.11	24.68	33.21	32.89	75.62	41.44	20.34	Male	S. paramamosain
96.82	91.64	95.56	60.47	25.84	32.19	34.03	75.16	40.19	20.14	Male	S. paramamosain
96.84	90.09	94.68	62.6	23.87	32.22	32.51	76.61	40.51	18.9	Male	S. paramamosain
96.87	90.72	95.5	60.94	25.42	34.2	33.18	71.64	37.41	18.87	Male	S. paramamosain
96.91	90.3	95	62.13	23.74	32.73	32.18	76.41	40.2	20.54	Male	S. paramamosain
96.97	90.32	95.42	60.59	24.35	32.18	32.79	70.77	39.39	20.34	Male	S. paramamosain
97.01	91.88	95.15	60.88	25.11	34.06	34.56	75.87	39.58	20.33	Male	S. paramamosain
97.12	90.11	95.89	65.38	25.22	33.68	32.51	69.74	40.51	20.52	Male	S. paramamosain
97.2	90.54	96.04	60.97	23.39	34.58	32.67	75.18	37.82	19.15	Male	S. paramamosain
97.21	91.53	95.75	62.32	23.73	34.58	34.39	69.76	40.09	18.94	Male	S. paramamosain
97.38	90.47	95.82	62.93	24.89	32.43	33.62	75.86	37.48	20.41	Male	S. paramamosain
97.4	92.4	96.1	67	23.56	34.69	35.23	69	40	20.39	Male	S. paramamosain
97.42	91.22	95.35	66.49	24.65	31.63	35.18	74.89	40.37	20.63	Male	S. paramamosain
97.49	89.33	95.7	63.85	24.35	32.1	31.84	73.04	38.9	18.76	Male	S. paramamosain
97.5	88.75	95.44	60.36	24.52	34.59	34.4	74.84	41.32	20.29	Male	S. paramamosain
97.59	91.16	95.44	66.58	24.01	35.07	35.35	72.15	39.59	19.34	Male	S. paramamosain
97.62	88.63	96.05	67.11	24.45	34.55	34.73	73.35	39.36	19.4	Male	S. paramamosain
97.69	90.22	96.43	62.46	24.78	32.37	32.27	70.11	39.99	19.68	Male	S. paramamosain
97.7	90.39	95.87	61.08	24.74	35.11	32.74	70.88	39.28	18.58	Male	S. paramamosain
97.87	89.86	96.55	61.07	25.38	34.98	32.03	74.71	38.56	20.55	Male	S. paramamosain
97.92	89.86	96.59	60.66	23.36	33.81	33.95	69.57	39.77	19.86	Male	S. paramamosain
97.98	91.87	97.09	65.3	24.55	32.55	34.41	69.07	41.72	18.59	Male	S. paramamosain
98.04	89.84	96.98	62.77	23.7	33.13	33.36	72.41	40.11	20.27	Male	S. paramamosain
98.05	89.13	96.05	62.2	24.53	32.83	33.03	75.93	38.66	19.52	Male	S. paramamosain
98.13	91.69	97	66.1	25.93	31.81	32.75	70.73	39.43	18.79	Male	S. paramamosain
98.24	89.69	96.25	63.97	24.53	35.11	35.43	70.83	38.14	18.9	Male	S. paramamosain
98.43	90.24	96.21	61.05	24.67	33.93	35.13	75.79	38.85	19.46	Male	S. paramamosain
98.54	90.49	97.17	61.84	24.07	33.94	34.08	70.59	40.02	20.25	Male	S. paramamosain
98.58	92.36	97.44	65.48	24.1	33.5	34.45	69.42	39.19	20.16	Male	S. paramamosain
98.67	91.25	97.04	62.39	24.37	34.29	34.33	75.18	38.16	19.84	Male	S. paramamosain
98.75	90.13	96.81	64.27	24.36	34.66	35.23	72.05	39.44	20.54	Male	S. paramamosain
98.87	91.53	97.79	60.31	25.18	33.96	32.25	71.83	38.57	20.45	Male	S. paramamosain
98.93	92.17	97.95	60.84	23.5	32.63	32.7	72.09	38.9	18.7	Male	S. paramamosain
98.99	90.76	97.94	63.72	25.34	32.99	32.18	72.52	37.52	18.97	Male	S. paramamosain
99.04	91.07	96.95	66.5	25.09	33.29	34.85	70.65	40.71	20.07	Male	S. paramamosain
99.06	90.33	97.92	62.98	24.46	32.94	35.21	70.02	38.83	18.59	Male	S. paramamosain
99.09	92.09	97.42	60.61	24.86	31.7	32.21	70.03	41.29	19.65	Male	S. paramamosain
99.14	92.87	97.83	62	23.66	34.77	32.25	76.25	39.63	18.6	Male	S. paramamosain
99.23	91.17	98.18	63.37	25.62	33.74	33.33	70.81	38.41	20.27	Male	S. paramamosain
99.33	91.66	98.02	66.48	25.56	32.91	32.81	72.04	39.88	19.41	Male	S. paramamosain
99.4	90.68	97.58	65.52	23.88	33.9	34.21	69.95	40.37	19.18	Male	S. paramamosain
99.48	93.08	97.48	67.12	23.82	33.96	34.79	76.55	40.67	19.93	Male	S. paramamosain
99.59	91	98.02	63.16	25.84	32.26	33.63	75.69	39.09	18.65	Male	S. paramamosain
99.6	93.54	98.43	61.53	23.39	34.78	32.15	73.41	38.47	19.64	Male	S. paramamosain
99.79	92.23	98.88	63.9	24.6	33.61	33.76	71.57	38.48	18.67	Male	S. paramamosain
99.81	92.69	97.81	60.39	23.38	32.39	33.88	69.99	41.67	20.53	Male	S. paramamosain
99.89	93.48	97.91	61.84	25.14	33.87	32.31	70.88	39.6	19.55	Male	S. paramamosain
99.94	93.32	98.69	64.37	23.34	33.39	34.18	73.54	40.15	18.67	Male	S. paramamosain
99.98	93.21	98.07	65.69	23.46	34.82	33.45	70.18	38.32	18.9	Male	S. paramamosain
101.06	93.86	99.3	71.94	27	35.75	34.73	78.45	42.25	19.45	Male	S. paramamosain
101.07	93.93	100.17	71.42	27.32	34.04	34.3	80.51	40.68	21.26	Male	S. paramamosain
101.13	94.63	99.19	71.17	27.93	33.18	36.87	80.97	44.28	20.97	Male	S. paramamosain
101.2	94.27	99.03	70.44	25.22	35.55	33.79	73.87	40.78	20.29	Male	S. paramamosain
101.45	94.12	100.12	71.55	27.09	33.46	33.87	78.94	44.08	21.13	Male	S. paramamosain
101.66	93.87	100.7	72.66	27.09	34.55	35.95	77.73	39.35	21.23	Male	S. paramamosain
101.76	94.55	100.03	71.46	27.66	33.18	36.49	83.75	42.92	21.87	Male	S. paramamosain
101.86	93.47	100.66	63.97	24.9	35	35.82	73.04	40.04	21.41	Male	S. paramamosain
101.92	94.63	99.7	68.48	25.11	33.6	34.23	75.6	44.63	22.33	Male	S. paramamosain
101.93	93.05	100.55	68.47	26.89	34.76	35.8	76.45	43.49	20.39	Male	S. paramamosain
102.01	93.08	99.72	63.85	26.21	36.55	33.69	80.89	43.49	21.4	Male	S. paramamosain
102.05	95.87	100.45	65.74	26.15	37.43	35.36	81.06	40.21	20.57	Male	S. paramamosain
102.2	93.66	99.99	70.52	27.23	37.1	35.84	72.68	39.9	21.27	Male	S. paramamosain
102.32	96.09	101.44	63.62	25.54	37	38.14	75.15	42.6	20.86	Male	S. paramamosain
102.41	93.6	100.38	68.74	26.7	35.42	35.12	80.28	43.43	21.57	Male	S. paramamosain
102.46	95.74	100.57	66.85	25.91	38.05	37.68	73.34	44.09	19.56	Male	S. paramamosain
102.47	93.5	100.33	70.21	24.9	34.4	38.28	75.88	39.54	21.07	Male	S. paramamosain
102.56	95.28	101.14	63.74	25.37	35.94	37.02	76.88	43.24	20.12	Male	S. paramamosain
102.83	94.37	101.2	72.06	26.56	33.92	37.13	75.57	44.7	21.44	Male	S. paramamosain
103.27	97.25	102.01	64.22	27.29	36.71	37.81	79.16	42.49	21.27	Male	S. paramamosain
103.46	96.83	102.25	64.97	25.91	33.22	36.8	76.18	44.3	20.88	Male	S. paramamosain
103.48	94.75	102.14	68.17	26.13	36.74	38.02	83.13	39.67	19.74	Male	S. paramamosain
103.56	95.07	102.28	64.25	27.14	37.56	38.21	83.4	42.25	21.19	Male	S. paramamosain
103.65	96.52	102.61	64.93	25.17	37.36	34.88	81.91	41.18	20.55	Male	S. paramamosain
103.67	96.18	102.48	67.74	27.52	37.17	34.86	73.91	44.79	20.93	Male	S. paramamosain
103.74	96.75	101.71	69.15	25.51	37.42	37.55	81.95	44.54	19.85	Male	S. paramamosain
103.78	95.89	101.55	71.53	24.88	37.2	36.88	75.27	45.16	22.35	Male	S. paramamosain
103.81	96.07	102.36	67.16	26.05	35.46	35.42	80.05	39.65	20.42	Male	S. paramamosain
103.88	96.45	102.26	71.37	24.55	35.2	34.86	76.29	41.99	22.12	Male	S. paramamosain
104.14	95.29	103.27	66.13	24.78	36.73	34.03	78.68	44.03	20.82	Male	S. paramamosain
104.2	96.71	102.77	67.73	25.15	35.96	37.28	83.3	39.4	19.5	Male	S. paramamosain
104.21	95.52	102.5	71.69	27.99	36.12	37.54	79.55	44.13	21.46	Male	S. paramamosain
104.39	97.56	103.08	68.94	24.81	33.18	38.12	76.04	40.28	21.95	Male	S. paramamosain
104.53	97.61	103.47	70.73	25.3	34.01	36.77	72.69	43.08	22.15	Male	S. paramamosain
104.54	97.31	102.9	64.91	28.19	37.07	35.97	83.73	43.25	19.8	Male	S. paramamosain
104.56	97.33	102.3	63.84	24.93	34.9	33.7	76.99	43.09	21.52	Male	S. paramamosain
104.84	97.41	103.75	69.86	27.76	33.91	38.29	78.83	40.44	22.33	Male	S. paramamosain
105	96.47	102.73	69.89	25.95	34.07	35.84	76.43	40.52	21.24	Male	S. paramamosain
105	98.56	103.42	69.38	26.73	35.23	35.75	78.12	40.09	21.24	Male	S. paramamosain
105.1	96.63	103.95	63.97	24.52	37.8	35.99	74.59	39.87	20.22	Male	S. paramamosain
105.16	97.84	103.32	65.56	25.09	33.63	38.53	72.69	41.73	21.49	Male	S. paramamosain
105.23	97.92	103.67	71.63	24.53	36.01	33.51	78.11	44.38	19.63	Male	S. paramamosain
105.25	99.02	103.99	65.25	24.7	37.93	36.48	76.13	42.25	20.46	Male	S. paramamosain
105.33	99.05	104.38	70.47	26.09	33.97	35.78	76.1	41.38	20.79	Male	S. paramamosain
105.37	96.51	104.28	69.45	27.49	35.39	36.81	79.53	42.68	21.68	Male	S. paramamosain
105.47	99.35	103.77	67.46	25.79	36.33	34.72	82.03	42.58	21.95	Male	S. paramamosain
105.52	97.16	104.09	64.02	26.53	38.23	35.7	80.23	43.67	20.63	Male	S. paramamosain
105.63	99.44	103.38	70.72	24.91	34.43	35.1	82.56	40.82	20	Male	S. paramamosain
105.64	97.19	104.43	69.64	27.63	36.98	36.8	73	41.82	22.21	Male	S. paramamosain
105.67	98.83	103.99	72.39	26.85	37.25	37.46	82.19	39.82	19.86	Male	S. paramamosain
105.88	97.76	104.34	67.08	26.36	38.17	34.4	81.52	44.68	21.34	Male	S. paramamosain
106.05	99.86	104.47	71.33	27.57	34.62	37.01	77.09	42.51	21.99	Male	S. paramamosain
106.17	98.66	104.6	68.98	26.84	34.1	38.26	74.51	44.48	21.21	Male	S. paramamosain
106.25	99.94	104.13	68.01	25.19	34.58	38.53	80.33	40.2	20.71	Male	S. paramamosain
106.32	98.06	104.13	66.91	27.21	36.76	37.65	77.82	40.73	20.51	Male	S. paramamosain
106.54	98.86	105.25	70.31	26.32	37.9	36.05	76.24	44.55	22.19	Male	S. paramamosain
106.71	98.44	105.85	66.84	28.1	33.65	37.67	82.27	39.45	20.54	Male	S. paramamosain
106.73	99.53	104.97	71.46	26.63	36.17	34.19	81.77	42.05	19.67	Male	S. paramamosain
107.03	98.28	105.5	67.67	26.52	38.2	34.8	80.62	41.21	22.15	Male	S. paramamosain
107.12	98.8	105.57	67.95	25.66	33.28	34.19	81.4	39.62	21.16	Male	S. paramamosain
107.13	100.42	106.11	70.03	25.26	36.68	34.02	78.28	41.85	21.66	Male	S. paramamosain
107.23	99.37	105.91	68.91	27.02	34.61	36.12	80.14	44.62	22.41	Male	S. paramamosain
107.46	98.68	105.26	67	27.79	34.8	35.89	77.52	40.08	20.43	Male	S. paramamosain
107.46	100.57	106.17	68.05	27.9	34.22	36.37	74.61	39.76	20.46	Male	S. paramamosain
107.49	101.07	105.25	64.95	26.01	36.4	34.52	79.75	39.73	21.55	Male	S. paramamosain
107.66	100.44	106.17	65.15	27.73	35.78	36.27	75.43	42.86	20.13	Male	S. paramamosain
107.7	99.17	105.91	66.99	26.12	35.46	36.54	83.69	40.74	22.32	Male	S. paramamosain
107.74	99.58	105.68	69.44	26.11	36.02	35.79	81.1	41.07	21.52	Male	S. paramamosain
107.76	99.33	106.83	67.22	26.08	36.64	34.81	79.31	42.97	20.53	Male	S. paramamosain
107.8	101.16	106.94	65.43	24.89	36.67	38.22	80.94	40.18	21.26	Male	S. paramamosain
107.81	99.67	106.53	65.62	27.39	33.36	33.85	82.11	44.71	19.69	Male	S. paramamosain
107.84	101.04	106.26	67.15	27.05	34.31	35.01	76.18	42.45	21.59	Male	S. paramamosain
107.88	100.72	106.91	64.78	24.74	34.68	34.94	74.23	41.92	21.13	Male	S. paramamosain
107.97	99.16	106.65	67.02	24.78	33.58	37.28	74.62	43.22	20.5	Male	S. paramamosain
108.03	101.53	106.58	67.75	26.24	34.5	37.35	74.94	40.34	20.99	Male	S. paramamosain
108.19	100.95	106.11	63.39	25.45	33.22	36.36	81.12	40.38	21.52	Male	S. paramamosain
108.22	101.01	106.85	67.55	25.25	34.61	34.89	73.36	44.21	21	Male	S. paramamosain
108.27	100.66	106.68	70.06	25.65	35.48	36.56	72.77	44.51	21.6	Male	S. paramamosain
108.63	102.45	107.78	66.86	25.28	35.48	33.79	79.44	39.73	20.28	Male	S. paramamosain
108.63	101.1	106.34	68.69	26.91	33.39	37.47	81.17	41.7	21.68	Male	S. paramamosain
108.86	101.54	107.28	69.87	27.8	35.23	35.21	81.81	39.47	20.8	Male	S. paramamosain
108.95	100.95	107.9	69.14	25.62	36.72	37.32	81.38	41.31	21.28	Male	S. paramamosain
108.98	102.73	107.82	65.7	28.06	36.85	33.84	79.23	43.29	20.01	Male	S. paramamosain
109	101.76	107.61	64.38	25.94	35.09	37.01	76.98	40.28	20.85	Male	S. paramamosain
109.07	100.89	108.11	71.09	26.31	33.27	37.64	74.59	42.12	20.01	Male	S. paramamosain
109.19	102.35	106.99	64.14	26.91	35.41	34.52	80.81	42.34	20.07	Male	S. paramamosain
109.34	102.07	107.07	67.8	24.57	36.12	36.91	75.79	40.55	20.92	Male	S. paramamosain
109.37	101.13	107.99	71.63	25.1	36.36	35.34	80.43	41.85	21.01	Male	S. paramamosain
109.39	100.94	108.16	67.11	27.56	36.68	35.56	81.37	44.06	21.84	Male	S. paramamosain
109.43	102.38	108.22	71.17	25.09	36.63	37.93	77.27	44.51	21.18	Male	S. paramamosain
109.68	102.08	108.05	68.99	25.4	35.98	36.87	73.11	41	20.95	Male	S. paramamosain
109.73	100.87	107.67	65.45	28.06	36.14	35.16	77.09	40.68	20.37	Male	S. paramamosain
109.88	101.99	108.51	70.94	25.46	37.38	35.05	82.24	39.45	20.17	Male	S. paramamosain
109.99	100.7	107.83	65.62	24.51	35.28	36.93	76.36	39.64	20.45	Male	S. paramamosain
110.16	103.16	109.03	75	28.81	41.12	37.73	82.39	48.34	24.09	Male	S. paramamosain
110.33	101.14	108.31	74.83	28.3	36.65	39.97	81.14	44.8	23.83	Male	S. paramamosain
110.39	102.55	108.8	72.08	30.1	36.48	36.86	91.81	49.15	23.4	Male	S. paramamosain
110.77	102.37	109.09	76.39	28.79	37.12	37.4	85.03	44.45	24.06	Male	S. paramamosain
110.91	102.23	108.79	70.57	29.52	38.51	41.87	90	45.59	24.37	Male	S. paramamosain
111.08	103.73	110.09	70.73	27.88	38.84	37.9	82.81	46	22.05	Male	S. paramamosain
111.16	102.44	109.88	73.77	28.84	39.49	41.4	87.12	49.64	24.31	Male	S. paramamosain
111.25	102.18	109.53	76.68	30.34	36.59	38.81	85.52	48.47	24.39	Male	S. paramamosain
111.33	102.43	109.45	71.78	27.06	41.64	38.34	90.51	48.01	21.34	Male	S. paramamosain
111.33	102.54	109.06	70.53	28.06	38.85	40.38	86.92	49.11	23.92	Male	S. paramamosain
111.5	103.46	110.09	71.01	28.97	36.69	41.8	80.95	47.56	24.6	Male	S. paramamosain
111.55	102.45	109.94	76.63	30.17	40.54	41.03	81.51	48.26	22.79	Male	S. paramamosain
111.61	102.31	109.66	70.19	28.9	40.93	36.74	84.92	46.54	22.66	Male	S. paramamosain
111.64	103.85	109.83	72.76	30.03	39.69	39.25	90.33	48.33	23.85	Male	S. paramamosain
111.64	104.7	110.66	70.77	28.9	41.71	41.21	91.01	47.64	21.55	Male	S. paramamosain
111.73	103.28	109.81	72.53	27.93	40.41	41.89	81.28	46.8	24.21	Male	S. paramamosain
112.06	103.65	110.42	77.59	27.73	39.63	36.85	87.53	44.59	24.2	Male	S. paramamosain
112.12	103.04	111.16	77.36	28.85	36.49	38.51	86.33	43.71	24.37	Male	S. paramamosain
112.19	102.94	111.23	79.06	27.4	36.79	39.17	82.91	43.67	21.99	Male	S. paramamosain
112.25	103.98	111.28	73.78	28	38.83	40.13	87.13	43.15	22.57	Male	S. paramamosain
112.97	104.72	111.03	72.54	27.46	40.13	41.03	83.42	45.26	22.3	Male	S. paramamosain
113.1	106.19	111.58	76.04	30.91	37.41	37.62	85.02	48.86	21.42	Male	S. paramamosain
113.42	105.37	111.2	69.26	28.34	39.63	38.1	91.53	46.59	24.1	Male	S. paramamosain
113.51	106	111.86	71.24	27.25	41.72	41.92	90.62	46.93	23.09	Male	S. paramamosain
113.57	105.16	111.56	78.54	26.75	41.84	37.5	86.77	45.4	22.61	Male	S. paramamosain
113.63	104.57	111.48	75.64	29	38.42	38.07	83.48	44.05	23.3	Male	S. paramamosain
113.69	106.37	111.65	71.44	28.51	37.99	38.3	90.23	44.46	22.94	Male	S. paramamosain
113.73	106.79	111.75	71.59	28.34	38.89	38.44	80.51	45.08	24.19	Male	S. paramamosain
114.05	106.52	112.52	77.62	28.07	39	41.68	85.64	43.24	21.95	Male	S. paramamosain
114.11	105.67	113.24	77.53	28.35	38.42	38.26	86.17	45.26	22.43	Male	S. paramamosain
114.17	105.86	113.26	74.83	30.88	39.26	38.62	86.95	44.19	22.7	Male	S. paramamosain
114.26	105.99	112.24	76.71	27.5	36.37	41.32	88.4	43.62	22.94	Male	S. paramamosain
114.32	106.84	112.64	77.54	29.71	41.55	38.91	87.77	46.08	23.93	Male	S. paramamosain
114.65	107.5	112.85	78.98	30.14	37.1	40.06	87.63	43.66	24.44	Male	S. paramamosain
114.67	105.83	112.62	73.14	28.12	39.55	37.16	81.69	45.16	21.86	Male	S. paramamosain
114.68	106.56	112.95	74.12	27.81	37.03	37.02	83.2	48.04	23.93	Male	S. paramamosain
114.71	107.37	113.08	69.3	30.56	38.44	37.39	90.54	43.87	24.16	Male	S. paramamosain
114.76	106.72	113.37	74.53	27.79	38.51	37.92	80.37	47.35	23.29	Male	S. paramamosain
114.78	107.63	112.88	76.92	28.66	38.83	37.88	86.97	46.86	22.15	Male	S. paramamosain
114.85	107.67	112.85	71.24	26.97	38.37	39.75	79.84	43.74	24.5	Male	S. paramamosain
114.96	107.51	114.08	72.37	30.65	41.54	39.88	88.91	44.16	22.52	Male	S. paramamosain
114.98	106.21	113.87	79.34	28.73	37.41	36.98	87.93	48.18	23.61	Male	S. paramamosain
115.19	106.6	113.77	71.01	27.47	38.73	39.66	85.3	42.94	23.8	Male	S. paramamosain
115.26	106.03	114.21	74.83	30.6	41.94	39.99	84.08	44.54	23.62	Male	S. paramamosain
115.59	107.04	113.85	70.24	27.45	37.39	38.66	83.28	45.65	21.87	Male	S. paramamosain
115.75	107.38	114.75	75.66	29.46	40.14	42.21	84.55	43	22.59	Male	S. paramamosain
115.82	108.65	114.67	70.81	27.8	40.39	37.02	87.49	49.33	24.39	Male	S. paramamosain
115.99	108.31	114.66	70.39	27.26	39.61	40	87.87	45.87	23.98	Male	S. paramamosain
116.05	107.76	114.71	77.61	29.09	36.87	39.4	87.36	45.91	23.42	Male	S. paramamosain
116.08	107.3	114.01	80.04	28.8	39.4	41.76	91.27	48.17	22.2	Male	S. paramamosain
116.28	109.2	114.2	79.74	29.01	36.56	38.29	90.07	43.72	24.22	Male	S. paramamosain
116.39	109.19	114.82	78.47	27.23	40.22	37.16	89.74	46.03	23.96	Male	S. paramamosain
116.61	108.82	115.19	75.97	29.46	38.54	38.75	85.66	48.99	22.07	Male	S. paramamosain
116.7	107.72	115.39	78.9	28.43	40.92	36.64	82.96	45.86	24.53	Male	S. paramamosain
117.28	109.62	115.23	79.11	29.05	38.64	42.1	90.13	47.09	23.16	Male	S. paramamosain
117.31	109.1	115.43	69.77	29.95	37.9	36.62	91.74	45.89	22.05	Male	S. paramamosain
117.52	109.56	115.97	75.91	27.9	37.87	37.36	83.82	48.47	22.47	Male	S. paramamosain
117.54	109.17	116.3	79.16	28.53	36.62	38.81	86.66	48.87	24.48	Male	S. paramamosain
117.61	110.27	115.89	76.89	27.25	36.86	36.92	80.5	49.41	22.13	Male	S. paramamosain
117.75	110.35	116.84	77.28	30.77	41.91	40.25	80.31	48.92	24.02	Male	S. paramamosain
117.83	110.88	116.81	69.72	27.82	40.65	37.59	81.98	43.01	22.7	Male	S. paramamosain
118.04	109.43	116.65	75.09	30.87	41.48	36.68	84.27	47.38	24.49	Male	S. paramamosain
118.05	109.95	116.55	75.44	27.81	41.5	37.81	84.57	43.73	24.2	Male	S. paramamosain
118.21	110.05	116.31	74.87	28.97	39.73	41.31	91.01	46.49	21.81	Male	S. paramamosain
118.34	109.8	116.57	71.39	27.4	36.78	40.92	91.68	47.9	23.54	Male	S. paramamosain
118.64	110.93	116.35	69.24	29.69	36.87	38.4	87.24	44.34	23.34	Male	S. paramamosain
118.94	110.06	117.91	76.65	27.28	41.81	41.66	83.74	45.05	24.56	Male	S. paramamosain
118.99	111.67	117.17	69.81	30.89	40.23	38.46	89.12	48.18	22.07	Male	S. paramamosain
119.09	109.99	117.34	70.76	30.69	36.75	39.13	83.78	48.79	23.86	Male	S. paramamosain
119.26	112.38	117.32	78.45	30.16	40.4	41.4	88.7	47.01	24.61	Male	S. paramamosain
119.46	111.84	118.12	77.02	29.81	41.07	37.02	86.31	46.76	24.13	Male	S. paramamosain
119.54	111.94	117.54	75.39	30.78	39.14	41.78	88.69	48.2	23.53	Male	S. paramamosain
119.81	110.68	118.19	74.35	27.5	37.78	37.61	84.66	45.84	24.05	Male	S. paramamosain
120.03	112.53	118.12	82.5	30.32	40.91	40.56	95.38	53.21	26.46	Male	S. paramamosain
120.94	112.96	118.9	79.92	29.92	41.67	42.27	90.6	52.47	24.03	Male	S. paramamosain
121.1	113.56	119.4	78.59	30.93	39.8	41.12	87.25	49.38	26.1	Male	S. paramamosain
122.36	113.39	120.82	81.55	30.5	43.23	45.61	90.87	51.77	23.26	Male	S. paramamosain
122.53	113.33	120.88	80.96	31.4	43.23	40.7	88.29	50.02	25.73	Male	S. paramamosain
122.8	115.99	120.9	81.49	29.24	40.72	44.49	97.54	53.45	25.78	Male	S. paramamosain
122.9	114.68	120.86	78.64	30.87	43.62	44.16	98.55	48.21	23.38	Male	S. paramamosain
123.4	116.09	122.5	81.17	29.67	41.96	43.24	96.5	51.61	23.93	Male	S. paramamosain
123.41	114.91	121.63	76.04	32.04	41.22	42.92	88.12	51.64	25.39	Male	S. paramamosain
123.86	114.82	122.85	86.26	30.58	39.83	40.95	88.84	52.43	23.82	Male	S. paramamosain
124	115.95	121.97	81.86	29.73	41.89	40.63	95.25	47.46	24.95	Male	S. paramamosain
124.04	115.77	122.81	77.17	32.26	40.92	44.69	91.31	50.44	23.61	Male	S. paramamosain
124.25	115.49	123.18	84.62	31.09	41	45.05	97.54	47.18	24.57	Male	S. paramamosain
124.78	117.68	122.56	77.7	30.13	42.46	42.24	86.75	53.63	23.54	Male	S. paramamosain
124.87	117.33	122.92	82.27	31.21	45.14	43.57	87.48	51.55	23.45	Male	S. paramamosain
124.95	118.01	124.06	77.87	29.46	44.36	42.1	98.4	49.9	25.64	Male	S. paramamosain
125	116.06	123.09	82.93	30.5	39.95	42.24	90.54	47.07	25.24	Male	S. paramamosain
125.38	118.2	123.75	84.86	30.93	39.74	45.12	90.89	49.43	24.37	Male	S. paramamosain
125.8	118.25	124.42	83.68	29.64	41.21	44.03	94.37	47.49	25.04	Male	S. paramamosain
125.87	117.14	124.58	82.99	31.96	44.81	44.03	95.99	46.97	25.74	Male	S. paramamosain
125.92	117.17	123.93	85.81	31.44	41.02	44.84	94.65	53.7	26.51	Male	S. paramamosain
126	117.4	124.85	77.52	31.33	41.28	41.86	94.77	50.86	24.44	Male	S. paramamosain
126.5	117.35	124.39	77.14	30.65	43.57	40.82	92.93	53.57	25.02	Male	S. paramamosain
126.6	119.41	125.77	82.84	32.5	43.77	41.52	91.11	47.41	24.19	Male	S. paramamosain
126.82	118.34	125.6	76.54	31.25	44.24	43.07	91.75	48.56	24.02	Male	S. paramamosain
127.16	118.22	124.99	85.4	29.34	44.58	44.69	95.12	51.35	25.75	Male	S. paramamosain
127.32	120.14	126.49	80.85	29.61	40.81	40.22	89.33	48.98	23.65	Male	S. paramamosain
127.39	118.98	126.52	86.52	31.82	42.53	41.85	97.84	50.8	26.21	Male	S. paramamosain
127.48	120.31	125.76	78.07	32.72	40.68	40.64	94.4	49.28	26.26	Male	S. paramamosain
127.71	118.41	126.62	84.79	31.49	42.24	41.56	97.06	52.43	25.69	Male	S. paramamosain
128.74	119.55	127.42	76.34	31.15	44.7	45.22	93.07	47.48	25.88	Male	S. paramamosain
129.1	121.03	127.21	79.35	30.03	43.16	43.18	95.82	52.51	25.7	Male	S. paramamosain
129.18	118.05	127.89	84.49	33.2	40.14	41.05	91.56	53.37	25.42	Male	S. paramamosain
129.21	121.22	127.46	84.06	29.74	43.79	44.13	96.38	47.39	26.19	Male	S. paramamosain
129.44	121.5	128.42	77.3	30.9	45.11	42.85	90.68	52.89	25.92	Male	S. paramamosain
129.86	119.09	128.98	82.71	32.12	43.04	42.24	86.96	47.59	25.21	Male	S. paramamosain
130.78	119.99	129.15	89.74	31.82	48.11	46.75	98.06	51.65	26.38	Male	S. paramamosain
132.06	122.72	130.52	92.2	34.57	48.91	46.24	106.46	54.69	28.01	Male	S. paramamosain
132.76	123.15	130.81	88.54	33.36	45.31	45.27	104.1	52.01	26.97	Male	S. paramamosain
133.42	125.54	131.89	81.78	33.52	47.61	48.23	105.39	53.34	25.62	Male	S. paramamosain
133.56	123.09	132.39	85.07	35.15	44.71	49.17	104.14	54.03	28.16	Male	S. paramamosain
134.49	123.94	133.17	81.72	33.27	45.7	46.05	95.21	58.03	25.81	Male	S. paramamosain
135.48	126.72	133.82	82.33	32.54	47.89	44.46	94.31	58.14	26.61	Male	S. paramamosain
135.66	128.01	134.59	86.05	34.13	42.95	49.39	94.74	57.64	27.55	Male	S. paramamosain
135.73	126.59	134.03	90.52	35.03	47.95	46.87	104.2	53.41	25.03	Male	S. paramamosain
138.21	129.92	135.94	92.75	35.36	47.92	45.48	101.81	57.08	25.35	Male	S. paramamosain
138.34	130.27	136.73	90.26	32.38	48.92	43.13	100.7	51.58	26.84	Male	S. paramamosain
138.35	127.61	136.1	86.18	34.66	44.67	47.77	100.06	50.86	25.84	Male	S. paramamosain
138.76	128.12	137.53	83.25	32.39	44.19	43.24	97.83	53.58	25.63	Male	S. paramamosain
139.19	128.17	137.19	82.36	33.16	47.19	48.16	102.87	51.01	25.19	Male	S. paramamosain
141.64	131.61	139.54	83.14	32.94	43.94	49.31	106.5	54.99	27.14	Male	S. paramamosain
95	89.79	93.58	64.05	25.67	33.15	32.68	75.8	37.45	19.79	Male	S. paramamosain
95.01	88.29	92.84	64.68	25.18	32.59	34.39	68.87	39.76	18.47	Male	S. paramamosain
95.17	88.13	94.34	61.01	25.93	33.34	33.73	68.73	37.44	18.74	Male	S. paramamosain
95.29	88.26	93.06	64.14	24.67	33	33.03	68.65	37.53	20.53	Male	S. paramamosain
95.35	90.39	93.81	64.63	23.32	34.61	34.31	70.02	39.51	19.73	Male	S. paramamosain
95.36	89.62	94.42	63.88	24.05	31.71	34.29	68.98	37.12	19.19	Male	S. paramamosain
95.44	88.42	93.74	66.19	25.74	33.02	33.72	74.28	40.06	19.53	Male	S. paramamosain
95.5	88.97	93.32	60.03	24.64	34.92	31.69	76.63	37.28	18.27	Male	S. paramamosain
95.59	90.53	94.65	65.7	23.94	32.46	32.89	74.94	38	20.26	Male	S. paramamosain
95.62	90.07	94.77	60.85	25.62	32.82	32.94	72.93	39.18	19.21	Male	S. paramamosain
95.75	90.77	94.69	64.15	24.87	33	35.37	73.81	38.83	19.24	Male	S. paramamosain
95.75	90.25	94.63	65.67	23.23	34.15	31.78	74.75	39.26	19.16	Male	S. paramamosain
95.86	88.66	94.52	60.89	23.16	31.14	33.75	69.23	37.49	19.46	Male	S. paramamosain
95.92	89.52	95.08	62.8	25.53	31.69	32.5	73.95	41.24	19.16	Male	S. paramamosain
95.94	89.87	94.08	67.16	23.49	34.44	33.69	69.32	39.04	19.94	Male	S. paramamosain
95.98	88.94	95.08	66.5	24.03	34.59	31.39	71.7	37.88	20.17	Male	S. paramamosain
96.11	89.78	94.09	61.51	23.52	32.52	31.54	76.63	37.04	19.34	Male	S. paramamosain
96.24	89.19	94.39	66.63	23.59	32.94	32.83	76.45	41.28	19.56	Male	S. paramamosain
96.31	90.14	94.13	65.66	24.57	33.08	33.38	68.87	37.07	20.2	Male	S. paramamosain
96.42	89.58	94.97	66.72	23.9	31.68	32.45	70.51	40.55	19.34	Male	S. paramamosain
96.42	89.95	94.48	65.97	23.22	33.12	35.11	74.07	37.24	18.93	Male	S. paramamosain
96.43	90.64	95.15	62.32	24.85	33.88	32.74	71.07	40.06	20.1	Male	S. paramamosain
96.47	89.46	95.02	62.26	25.64	34.19	33.12	68.75	38.88	19.39	Male	S. paramamosain
96.5	90.57	95.17	65.55	25.57	34.41	33.48	74.08	37.79	20.56	Male	S. paramamosain
96.56	90.64	95.1	66.11	23.43	34.71	34.74	73.34	40.16	19.45	Male	S. paramamosain
96.58	90.02	94.42	65.99	24.48	33.93	35.37	70.04	37.12	18.34	Male	S. paramamosain
96.6	91.22	95.64	59.7	23.44	32.73	33.56	72.02	41.59	19.66	Male	S. paramamosain
96.62	91.36	95.26	63.6	23.55	32.8	33.03	72.57	38.97	19.05	Male	S. paramamosain
96.77	90.89	94.76	63.04	23.88	33.88	34.85	75.12	40.02	19.74	Male	S. paramamosain
96.92	90.64	95.72	65.13	24.68	32.77	33.34	76.05	37.21	18.3	Male	S. paramamosain
97.02	90.06	94.99	59.6	25.9	33.2	34.86	75.12	37.51	18.8	Male	S. paramamosain
97.07	91.64	95.86	61.08	23.58	31.71	31.69	68.83	38.09	18.62	Male	S. paramamosain
97.21	91.04	94.96	62.73	25.85	32.42	32.29	73.83	39.8	20.29	Male	S. paramamosain
97.36	91.99	96.43	64.34	23.39	32.45	33.39	72.98	41.4	18.6	Male	S. paramamosain
97.37	91.14	96.27	66.54	25.36	32.71	33.43	76.36	39.51	18.66	Male	S. paramamosain
97.5	90.83	96.31	63.73	24.4	33.31	32.68	76.55	38.62	18.81	Male	S. paramamosain
97.67	91.69	95.72	66.07	24.74	31.69	34	75.33	39.67	18.75	Male	S. paramamosain
97.87	91.02	97.01	59.5	23.57	34.64	35.27	72.92	37.13	20.48	Male	S. paramamosain
97.96	91.32	96.8	66.24	25.7	34.07	34.28	71.3	41.56	18.4	Male	S. paramamosain
98.03	89.32	96.52	64.57	24.11	33.33	33.17	75.39	37.7	18.79	Male	S. paramamosain
98.06	89.87	96.23	61.88	23.82	33.64	31.72	75.42	39.86	19.81	Male	S. paramamosain
98.08	90.12	96.85	60.66	25.29	31.34	34.24	74.3	38.72	19.48	Male	S. paramamosain
98.16	90.92	96.95	60.05	23.13	34.37	33.04	71.93	39.82	19.74	Male	S. paramamosain
98.27	90.39	96.79	66.79	23.02	33.8	31.5	74.85	39.75	18.38	Male	S. paramamosain
98.42	91.74	96.58	60.25	23.12	31.5	33.13	75.79	37.44	20	Male	S. paramamosain
98.43	90.49	97.59	66.82	23.62	33.19	31.95	74.21	38.44	19.42	Male	S. paramamosain
98.44	90.97	96.26	66.59	23.97	34.73	34.9	74.05	40.47	19.86	Male	S. paramamosain
98.54	91.39	97.37	61.7	24.52	34.72	33.56	75.42	38.01	20.45	Male	S. paramamosain
98.58	89.93	96.39	66.18	25.24	31.43	35.38	70.54	37.56	19.77	Male	S. paramamosain
98.58	90.05	96.8	63.25	23.57	33.14	34.59	71.64	41	18.43	Male	S. paramamosain
98.66	91.39	97.72	66.89	25.47	31.93	34.29	70	39.1	19.57	Male	S. paramamosain
98.66	91.01	97.04	65.45	25.11	31.2	31.56	70.16	37.92	19.03	Male	S. paramamosain
98.87	92.72	96.68	62.8	25.72	34.77	33.43	73.07	37.65	19.71	Male	S. paramamosain
98.88	91.06	96.6	60.17	23.48	32.86	35.4	72.76	38.07	20.23	Male	S. paramamosain
98.9	90.84	97.65	59.59	25.48	31.31	31.49	73.45	39.73	19.2	Male	S. paramamosain
99.04	91.41	96.76	62.33	24.02	32.15	33.39	70.59	38.69	19.4	Male	S. paramamosain
99.07	91.32	98.19	62.28	25.59	34.97	33.93	72.3	38.6	20.47	Male	S. paramamosain
99.33	90.33	97.32	61.06	25.53	31.45	32.12	68.54	39.24	18.34	Male	S. paramamosain
99.42	92.6	97.74	61.07	25.02	33.56	33.52	69.69	37.28	20.64	Male	S. paramamosain
99.47	91.85	97.24	63.84	24.22	34.47	31.43	73.94	39.47	20.19	Male	S. paramamosain
99.58	93.13	98.09	62.24	25.48	31.72	32.09	71.21	37.89	19.88	Male	S. paramamosain
99.65	92.14	97.36	63.41	23.22	33.15	34.42	70.27	38.25	19.42	Male	S. paramamosain
99.68	91.16	98.76	61.65	23.07	32.56	33.38	76.68	39.74	18.52	Male	S. paramamosain
99.7	92.98	98.63	61.71	23.91	33.02	32.74	75.76	40.01	19.7	Male	S. paramamosain
99.71	93.35	97.63	65.13	24.28	33.81	34.01	71.37	39.36	20.12	Male	S. paramamosain
99.88	93.53	98.39	64.42	23	34.87	35.15	68.86	39.09	19.19	Male	S. paramamosain
100.04	93.65	99.15	63.37	25.3	37.67	37.15	82.74	39.91	21.26	Male	S. paramamosain
100.32	92.68	98.56	65.59	26.76	35.32	36.13	79.22	41.97	19.84	Male	S. paramamosain
100.86	93.68	99.7	72.61	24.19	34.37	33.69	80.11	43.09	19.76	Male	S. paramamosain
101.03	92.63	98.91	68.89	26.89	36.01	37.91	81.98	45.28	21.29	Male	S. paramamosain
101.17	93.58	100.21	72.72	24.57	37.15	37.46	79.27	42.88	21.47	Male	S. paramamosain
101.2	94.26	99.66	70.32	26.12	34.76	35.76	81.08	41.85	19.44	Male	S. paramamosain
101.57	94.88	99.55	64.34	26.43	36.61	35.58	73.68	45	21.31	Male	S. paramamosain
101.6	94	100.17	64.89	26.9	34.08	33.35	74.1	44.74	20.73	Male	S. paramamosain
101.79	94.74	100.1	66.49	24.05	33.01	38.1	72.81	43.76	20.55	Male	S. paramamosain
101.91	94.33	99.83	71.63	26.02	37.33	34.14	81.55	43.08	19.23	Male	S. paramamosain
101.96	94.82	101.02	69.39	25.89	33.93	34.74	76.45	41.83	21.84	Male	S. paramamosain
102.03	94.93	100.94	67	24.36	32.96	35.7	82.04	42.32	21.49	Male	S. paramamosain
102.24	95.64	101.15	69.66	26.86	34.25	34.46	72.25	40.37	19.23	Male	S. paramamosain
102.44	95.01	101.06	72.28	25.12	35.32	32.77	73.83	45.26	19.27	Male	S. paramamosain
102.51	93.61	101.58	64.08	27.11	32.57	34.51	82.53	42.52	22.39	Male	S. paramamosain
102.54	94.49	100.41	62.81	27.3	35.73	36.42	72.59	44.74	20.45	Male	S. paramamosain
102.61	95.04	100.33	72.33	24.35	33.61	38.15	81.53	41.6	20.27	Male	S. paramamosain
102.63	94.43	101.2	68.94	26.42	32.87	38.47	75.61	43.05	21.27	Male	S. paramamosain
102.66	94.29	100.93	70.09	24.01	34.99	36.02	75.21	41.59	21.94	Male	S. paramamosain
103.09	96.11	101.51	72.15	26.54	36.88	35.25	77.99	39.34	20.44	Male	S. paramamosain
103.12	94.71	101.65	70.33	27.45	32.86	33.03	83.63	40.6	19.15	Male	S. paramamosain
103.2	94.79	102.35	69.72	26.22	35.63	32.87	74.09	44.81	21.31	Male	S. paramamosain
103.32	94.93	101.79	63.79	28.19	35.09	34.49	81.45	42.85	22.27	Male	S. paramamosain
103.34	95.2	102.52	63.32	26.25	35.49	35.73	82.03	42.42	20.81	Male	S. paramamosain
103.65	95.76	102.25	63.98	24.61	34.01	33.55	82.81	38.91	21	Male	S. paramamosain
103.75	96.59	102.66	66.47	26.26	32.56	37.29	82.23	44.55	22.36	Male	S. paramamosain
103.95	95.72	102.36	69.77	27.62	34.97	32.96	76.51	44.15	22.12	Male	S. paramamosain
103.98	95.32	102.87	67.22	27.8	33.22	32.98	81.34	41.72	21.31	Male	S. paramamosain
104.09	97.49	102.09	62.59	27.66	33.08	33.16	71.86	39.2	20.74	Male	S. paramamosain
104.12	96.97	101.96	67.75	28.14	36.35	37.74	73.7	39.23	19.7	Male	S. paramamosain
104.2	97.56	102.92	71.88	27.85	37.57	34.74	73.58	41.34	21.11	Male	S. paramamosain
104.31	96.57	102.87	63.89	26.45	36.6	34.16	79.33	42.5	20.61	Male	S. paramamosain
104.43	95.53	103.18	68.47	25.53	34.75	37.4	78.04	39.13	21.07	Male	S. paramamosain
104.43	95.73	103.14	69.05	24.43	35.32	33.47	78.94	39.13	22.39	Male	S. paramamosain
104.66	96.15	102.52	67.23	26.98	34.79	34.7	71.78	44.84	19.12	Male	S. paramamosain
104.75	96.54	103.9	64.35	26.85	32.95	38.15	76.37	40.16	20.06	Male	S. paramamosain
104.85	96.7	103.83	62.83	27.91	37.07	38.17	72.97	40.34	20.03	Male	S. paramamosain
105.01	98.74	103.79	67.11	27.23	32.66	36.39	71.41	40.8	20.03	Male	S. paramamosain
105.02	96.42	103.36	65.54	25.8	35.26	35.02	77.99	44.04	20.05	Male	S. paramamosain
105.08	98.6	103.83	67.78	25.59	36.32	36.2	72.41	40.61	19.98	Male	S. paramamosain
105.11	99.1	103.29	69.69	25.67	34.02	34.9	75.16	40.06	19.76	Male	S. paramamosain
105.31	96.52	103.94	67.17	24.3	36.52	35.62	83.24	41.01	20.04	Male	S. paramamosain
105.98	97.86	103.88	64.95	26.11	34.37	38.52	71.28	41.73	20.45	Male	S. paramamosain
106.08	98.51	105.09	67.99	26.02	34.65	37.41	72.71	40.83	21.5	Male	S. paramamosain
106.3	98.75	105.01	65.92	27.65	37	37.83	76	45.24	22.11	Male	S. paramamosain
106.31	97.73	105.35	68.21	27.28	35.55	35.11	77	43.8	20.17	Male	S. paramamosain
106.35	99.46	104.88	64.93	25.14	33.18	36.61	72.87	44.36	20.54	Male	S. paramamosain
106.54	99.35	105.27	64.55	26.29	35.17	38.45	80.58	41.56	19.26	Male	S. paramamosain
106.59	99.35	105.53	68.02	25.19	34.66	33.12	73.2	44.63	21.19	Male	S. paramamosain
107.24	100.59	105.47	66.89	26.62	32.91	35.89	75.64	41.82	19.77	Male	S. paramamosain
107.32	98.69	105.95	72.28	24.95	33.68	32.98	75.71	40.95	21.64	Male	S. paramamosain
107.33	99.53	105.99	71.27	25.44	34.99	37.33	71.68	44.03	19.3	Male	S. paramamosain
107.69	99.52	106.46	71.05	24.12	34.14	34.78	78.58	43.92	20.18	Male	S. paramamosain
108.12	100.44	105.85	65.8	24.52	37.25	36.38	76.07	41.96	21.82	Male	S. paramamosain
108.19	101.55	107.16	64.18	24.48	37.49	36.36	76.19	41.22	21.21	Male	S. paramamosain
108.32	102.28	107.46	72.67	25.84	38.1	36.88	81.22	42.09	20.12	Male	S. paramamosain
108.89	100.79	107.51	72.16	24.05	32.96	35.68	76.86	40.65	19.42	Male	S. paramamosain
109.24	100.3	108.01	70.06	25.09	34.39	35.07	75.67	40.75	20.42	Male	S. paramamosain
109.39	102.38	107.41	65.85	27.7	37.05	34.18	80.61	41.65	21.58	Male	S. paramamosain
109.55	102.33	108.26	66.49	26.12	33.96	36.01	74.96	41.79	19.57	Male	S. paramamosain
109.87	102.26	108.86	62.89	27.18	32.79	35.54	80.71	38.81	22.28	Male	S. paramamosain
109.88	103.3	108.4	65.36	27.92	33.72	35.93	72.14	38.53	22.05	Male	S. paramamosain
109.9	102.49	107.8	72.73	25.42	36.18	35.25	75.88	45.03	20.66	Male	S. paramamosain
110.04	103.34	108.81	77.29	31.2	37	39.01	81.11	49	23.05	Male	S. paramamosain
110.15	102.74	108.3	72.91	29.03	38.13	38.67	85.67	48.83	23.11	Male	S. paramamosain
110.22	103.67	108.51	77.82	31.07	40.16	37.85	85.35	45.57	22.45	Male	S. paramamosain
110.26	103.59	109.16	76.95	28.4	40.28	37.34	83.51	46.52	22.64	Male	S. paramamosain
110.34	103.19	109	74.52	30.94	41.67	41.87	90.54	49.11	24.17	Male	S. paramamosain
110.41	102.18	108.87	77.14	30.22	38.23	40.47	86.29	47.26	24.38	Male	S. paramamosain
110.45	102.38	108.22	77.37	28.84	41.2	39.11	92.31	47.66	24.06	Male	S. paramamosain
110.49	103.58	109.45	75.23	29.27	42.15	37.27	86.71	48.48	22.34	Male	S. paramamosain
110.74	101.74	108.72	73.35	27.69	42.29	40.91	80.46	47.51	24.72	Male	S. paramamosain
110.74	103.28	109.45	74.17	27.55	40.95	40.08	84.23	43.61	24.48	Male	S. paramamosain
110.74	102.81	109.21	77.71	29.76	38.19	39.99	86.38	49.3	22.09	Male	S. paramamosain
110.81	103.61	109.74	78.73	30.39	42.1	40.81	83.31	49.57	23.46	Male	S. paramamosain
111.14	102.38	109.17	70.54	28.49	39.78	40.46	91.69	46.33	23.27	Male	S. paramamosain
111.28	102.14	109.3	71.61	28.53	36.65	41.96	92.39	48.1	24.02	Male	S. paramamosain
111.31	103.38	110.19	80.44	29.36	38.13	40.17	81.58	48.88	22.22	Male	S. paramamosain
111.31	104.02	110.17	74.34	27.31	37.04	42.14	90.04	48.1	24.71	Male	S. paramamosain
111.46	102.2	110.55	79.11	29.78	37.57	38.32	81.93	48.64	22.89	Male	S. paramamosain
111.48	102.94	110.01	70.99	27.13	39.92	42.37	86.54	47.48	22.16	Male	S. paramamosain
111.48	102.51	110.19	73.43	27.59	37.68	41.21	90.73	46.72	23.46	Male	S. paramamosain
111.49	103.25	109.81	78.05	29.46	38.79	41.91	91.86	45.12	21.67	Male	S. paramamosain
111.51	104.15	110.07	72.9	30.86	39.88	38.42	89.95	48.43	21.61	Male	S. paramamosain
111.85	103.25	110.34	78.36	30.72	41.11	38.06	84.49	47.19	21.63	Male	S. paramamosain
111.87	103.41	109.73	72.75	30.59	38.05	40.95	83.95	48.98	22.64	Male	S. paramamosain
111.88	103.94	110.97	78.33	30.41	39.1	37.85	85.73	43.87	23.93	Male	S. paramamosain
111.94	104	110.97	70.62	30.77	40.36	39.57	82.1	48.08	24.57	Male	S. paramamosain
111.98	103.36	109.96	74.76	30.16	36.63	41.26	81.8	47.2	24.44	Male	S. paramamosain
112	104.89	110.92	74.88	30.58	41.31	41.01	90.93	44.9	23.15	Male	S. paramamosain
112.21	104.48	110.83	77.32	29.59	37.9	39.57	91.42	47.8	22.73	Male	S. paramamosain
112.23	103.77	110.8	75.66	27.64	42.11	41.55	84.78	46.27	22.79	Male	S. paramamosain
112.24	103.41	111.06	76.93	30.66	36.89	41.06	86.95	47.64	22.23	Male	S. paramamosain
112.29	104.22	110.38	79.71	29.92	40.12	41.06	91.58	44.49	22.92	Male	S. paramamosain
112.61	104.7	110.44	75.18	27.64	39.97	38.56	83.62	44.64	24.67	Male	S. paramamosain
112.62	103.38	111	74.3	27.57	41.2	38.99	80.74	46.66	22.93	Male	S. paramamosain
112.65	105.3	111.39	74.46	29.38	39.44	39.97	90.41	44.94	22.87	Male	S. paramamosain
112.69	105.51	111.57	71.6	30.36	39.08	38.92	91.84	49.15	23.88	Male	S. paramamosain
113.05	104.53	111.89	70.74	30.79	41.98	37.7	92.63	45.37	23.7	Male	S. paramamosain
113.13	104.69	112.16	72.62	30.52	38.3	37.29	87.71	43.4	23.95	Male	S. paramamosain
113.19	104.04	111.61	78.74	30.47	40.17	39.32	88.19	46.08	23.79	Male	S. paramamosain
113.23	105.64	112.37	74.37	29.71	37.61	38.38	87.75	44.25	22.86	Male	S. paramamosain
113.33	104.94	111.23	72.07	28.74	37.05	38.55	88.83	44.79	23.61	Male	S. paramamosain
113.49	105.92	112.57	71.38	27.75	39.1	39.7	87.45	44.74	22.42	Male	S. paramamosain
113.58	105.74	112.46	77.03	27.11	41.64	38.83	90.34	45.2	23.2	Male	S. paramamosain
113.67	104.64	111.6	75.02	30.11	39.71	38.62	92.53	48.72	22.12	Male	S. paramamosain
113.73	104.91	111.6	70.56	28.71	38.15	37.35	80.87	45.7	21.71	Male	S. paramamosain
113.86	106.12	111.57	71.94	27.84	40.24	36.84	86.83	47.45	22.6	Male	S. paramamosain
114.07	105.07	113.17	76.67	27.88	38.11	39.93	84.05	44.9	22.42	Male	S. paramamosain
114.16	106.16	113.32	74.28	27.76	37.05	39.85	87.48	44.02	23.08	Male	S. paramamosain
114.41	106.38	113.29	74.42	29.39	41.46	37.62	92.17	46.7	22.43	Male	S. paramamosain
114.55	105.28	113.6	77.88	30.9	40.58	42.09	87	46.39	24.61	Male	S. paramamosain
114.67	106.29	113.58	80.65	30.8	42.25	41.17	84.1	50.03	23.61	Male	S. paramamosain
114.8	105.68	113.29	75.79	30.12	42.05	37.53	92.37	50.02	24.47	Male	S. paramamosain
114.85	106.57	112.88	74.73	30	39.91	42.06	81.47	48.12	23.67	Male	S. paramamosain
115.12	107.06	114.16	72.92	27.31	38.15	38.81	91.6	49.5	22.43	Male	S. paramamosain
115.24	107.47	114.39	77.36	28.97	39.46	37.94	92.01	46.43	23.06	Male	S. paramamosain
115.24	107.96	114.35	70.69	31.09	40.65	37.57	87.36	49.76	24.16	Male	S. paramamosain
115.54	106.31	113.58	75.34	30.59	40.45	39.79	86.57	43.96	24.15	Male	S. paramamosain
115.66	107.39	113.72	70.72	27.34	36.75	37.69	80.55	47.19	22.16	Male	S. paramamosain
115.68	107.38	113.93	73.85	29.34	39.7	38.9	83.83	48.27	21.91	Male	S. paramamosain
115.71	106.95	113.93	71.16	28.73	38.06	39.47	83.97	47.7	24.49	Male	S. paramamosain
115.78	107.54	113.49	69.91	29.01	39.98	38.43	90.67	48.35	23.37	Male	S. paramamosain
115.96	107.93	114.14	77.92	29.49	40.26	37.28	91.8	49.52	24.52	Male	S. paramamosain
115.99	107.57	114.19	69.95	27.61	36.91	39.65	81.92	47.79	22.53	Male	S. paramamosain
115.99	108.22	115	70.35	30.97	41.27	37.1	80.66	43.36	24.04	Male	S. paramamosain
116.07	107.66	114.22	72.93	28.08	38.97	40.91	88.6	45.83	23.94	Male	S. paramamosain
116.32	108.55	114.88	75.93	30.2	40.57	37.7	82.23	45.78	22.83	Male	S. paramamosain
116.35	108	115.24	70.71	29.42	37.19	40.73	80.43	46.24	23.36	Male	S. paramamosain
116.54	107.29	114.35	70.21	28.04	40.18	40.39	83.82	46.94	24.69	Male	S. paramamosain
116.6	107.71	115.63	73.88	29.76	37.09	39.42	81.91	49.51	21.95	Male	S. paramamosain
116.72	109.78	115.45	78.45	28.6	36.57	38.87	85.64	44.93	24.01	Male	S. paramamosain
116.8	107.91	115.45	74.99	30.27	42.2	39.81	92.45	47.19	24.17	Male	S. paramamosain
116.88	108.32	114.88	75.5	27.88	39.88	38.66	80.64	45.38	24.48	Male	S. paramamosain
116.88	108.45	115.33	75.66	30.62	37.14	39.43	82.17	46.55	23.07	Male	S. paramamosain
116.91	110	115.23	75.27	30.04	40.28	39.66	87.1	44.29	24.23	Male	S. paramamosain
117.08	109.2	115.96	76.19	28.81	37.75	38.97	80.36	43.48	23.33	Male	S. paramamosain
117.1	107.91	115.28	76.82	27.36	40.28	39.17	81.53	45.87	24.67	Male	S. paramamosain
117.21	109.79	115.55	73.97	27.71	40.95	40.09	83.66	46.29	23.35	Male	S. paramamosain
117.27	108.56	116.23	79.77	28.25	37.27	39.76	92.19	44.44	22.28	Male	S. paramamosain
117.3	109.64	115.53	75.67	30.99	40.86	39.76	90.35	47.42	22.28	Male	S. paramamosain
117.49	110.34	115.62	71.32	30.97	39.87	38.66	82.33	44.01	21.62	Male	S. paramamosain
117.5	110	116.38	71.76	29.69	41.7	42.42	87.87	43.57	22.33	Male	S. paramamosain
117.62	110.15	116.36	72.69	29.78	38.41	41.23	81.44	47.63	22.15	Male	S. paramamosain
117.63	108.5	115.74	76.65	27.71	36.66	38.87	82.78	49.32	21.79	Male	S. paramamosain
117.77	109.4	116.4	75.36	30.48	39.42	39.78	89.7	48.14	23.46	Male	S. paramamosain
118.02	111.09	116.58	75.43	28.28	41.71	42.16	87.49	46.59	22.5	Male	S. paramamosain
118.13	109.59	116.2	80.27	27.33	38.63	38.34	85.18	45.93	24.5	Male	S. paramamosain
118.32	109.54	116.46	75.32	27.94	40.42	41.7	87.37	48.65	24.73	Male	S. paramamosain
118.42	109.68	116.96	79.1	30.33	40.92	38.37	84.53	49.94	24.44	Male	S. paramamosain
118.52	110.53	117.04	76.79	27.27	41.39	41.13	85.49	44.89	23.61	Male	S. paramamosain
118.59	111.74	116.63	72	27.8	38.09	38.56	84.14	47.72	24.03	Male	S. paramamosain
118.65	111.73	116.42	73.21	30.9	37.28	40.52	86.85	45.87	22.35	Male	S. paramamosain
118.66	110.9	117.5	79.11	27.38	37.78	42.27	84.3	48.2	23.14	Male	S. paramamosain
118.66	110.81	117.68	77.49	30.57	38.17	41.07	83.34	44.44	21.82	Male	S. paramamosain
118.67	109.5	116.6	71.79	27.65	41.65	42.58	92.02	47.36	23.52	Male	S. paramamosain
118.79	111.9	117.77	69.76	29.03	42.12	36.95	88.22	45.66	22.32	Male	S. paramamosain
118.84	112.03	116.79	73.01	30.19	41.37	37.44	84.1	46.79	22.44	Male	S. paramamosain
119.09	110.52	116.79	77.5	30.3	39.39	42.19	89.29	49.82	21.69	Male	S. paramamosain
119.29	111.06	117.54	80.48	28.39	41.43	39.93	81.54	46.49	23.43	Male	S. paramamosain
119.33	111.73	117.55	71.97	29.49	38.82	39.05	89.25	44.97	21.88	Male	S. paramamosain
119.37	110.92	117.73	74.35	31.07	36.68	42.15	85.41	47.75	22.44	Male	S. paramamosain
119.59	112.55	118.03	72.35	28.14	38.96	40.47	84.88	43.97	22.15	Male	S. paramamosain
119.63	111.01	117.96	80.1	30.48	39.17	42.48	83.13	43.52	22.1	Male	S. paramamosain
119.66	110.63	118.37	78.94	28.81	39.63	38.53	89.9	46.39	22.56	Male	S. paramamosain
119.67	111.36	117.9	75.35	29.1	37.42	41.02	83.03	44.27	22.29	Male	S. paramamosain
119.73	111.4	118.22	72.24	30.6	40.06	42.2	84.52	44.39	22.76	Male	S. paramamosain
119.75	111.9	118.51	74.37	27.82	40.46	41.4	83.03	43.87	24.79	Male	S. paramamosain
119.92	108.99	118.45	78.53	27.56	40.04	37.87	89.45	49.54	22.08	Male	S. paramamosain
119.92	111.3	117.74	80.47	29.1	37.98	38.86	80.63	45.1	22.54	Male	S. paramamosain
119.98	109.39	118.38	80.64	27.72	37.35	40	84.63	43.76	22.25	Male	S. paramamosain
120.03	109.2	117.94	76.92	30.64	41.04	41.06	92.69	52.57	25.34	Male	S. paramamosain
120.4	110.97	119.33	83.95	32.16	43.1	42.57	92.05	50.88	23.31	Male	S. paramamosain
120.54	109.42	119.58	84.98	30.22	43.95	44.86	96.65	50.51	25.47	Male	S. paramamosain
121.15	111.21	118.93	82.23	29.27	39.65	44.07	97.93	52.89	24.41	Male	S. paramamosain
121.52	112.84	119.46	82.57	29.43	42.64	39.96	87.07	50.81	24.41	Male	S. paramamosain
121.65	111.09	120.52	80.36	31.4	44.51	43.95	98.25	47.22	23.87	Male	S. paramamosain
122.05	112.47	120.52	84.35	31.48	43.65	42.62	87.82	52.41	24.03	Male	S. paramamosain
122.4	111.67	120.5	79.57	31.48	43.45	41.9	95.3	51.79	25.36	Male	S. paramamosain
122.51	112.16	120.26	84.26	29.57	42.1	41.34	96.93	53.34	24.93	Male	S. paramamosain
122.53	113.31	120.91	77.11	29.32	41.14	41.67	94.49	53.28	24.89	Male	S. paramamosain
122.82	113.85	121.43	76.85	29.47	42.97	42.88	89.79	49.86	23.35	Male	S. paramamosain
123.85	113.95	121.86	76.37	29.66	40.49	40.29	94.26	48.53	25.04	Male	S. paramamosain
123.87	116.32	122.16	80.66	31.77	42.28	44	89.86	48.77	26.03	Male	S. paramamosain
124.09	113.72	123.1	76.88	29.29	44.52	44.92	86.84	52.61	25.85	Male	S. paramamosain
124.12	116.52	122.35	78.27	32.23	42.58	40.79	92.89	49.36	23.35	Male	S. paramamosain
124.33	114.62	123.02	82.22	30.13	44.39	40.31	93.62	48.25	24.25	Male	S. paramamosain
124.5	113.31	122.87	84.52	29.39	42.51	42.9	89.85	50.79	24.83	Male	S. paramamosain
124.52	113.52	123.43	82.14	31.99	42.94	43.37	97.42	49.29	23.38	Male	S. paramamosain
124.81	117.78	123.19	84.82	29.28	41.5	41.89	93.63	51.73	25.04	Male	S. paramamosain
125.23	116.74	124.37	79.64	30.77	41.69	45.02	92.53	48.01	25.85	Male	S. paramamosain
125.24	116.92	123.37	84.93	30.67	39.89	40.18	96.25	48.61	24.69	Male	S. paramamosain
126.3	117.5	125.45	83.25	31.1	44.34	43.69	91.39	49.46	26.34	Male	S. paramamosain
126.83	116.73	125.26	84.82	31.69	41.34	44.09	96.12	52.07	25.01	Male	S. paramamosain
127.27	119.7	126.33	77.41	30.45	41.37	44.19	95.61	50.23	25.81	Male	S. paramamosain
127.94	116.87	126.77	77.26	32.98	43.84	40.75	90.65	53.14	23.32	Male	S. paramamosain
128.55	119.01	126.68	77.86	32.5	42.52	43.89	89.69	52.04	23.93	Male	S. paramamosain
129.06	118.07	127.58	82.1	32.22	41.05	40.63	92.83	52.25	26.12	Male	S. paramamosain
129.2	121.13	127.77	75.97	29.86	44.6	43.71	89.86	47.91	24.92	Male	S. paramamosain
129.29	121.59	128.26	79.59	31.82	42.01	44.13	91.84	50.24	25.38	Male	S. paramamosain
129.49	121.96	128.36	80.91	30.15	43.33	40.75	87.15	48.02	23.77	Male	S. paramamosain
129.71	122.6	128.41	77.02	30.1	40.64	44.96	89.76	51.9	26.25	Male	S. paramamosain
130.39	122.01	128.34	87.13	34.77	48.67	44.13	105.69	51.89	25.72	Male	S. paramamosain
130.64	122.34	128.96	84.21	33.03	43.14	43.69	100.58	51.46	25.09	Male	S. paramamosain
130.75	121.63	128.77	84.29	34.01	45.51	45.01	100.47	57.05	26.79	Male	S. paramamosain
131.36	124.1	130.17	90.23	35.76	47.04	47.58	104.17	52.47	26.42	Male	S. paramamosain
131.9	124.04	130.71	92.16	31.5	45.14	45.8	96.1	57.56	25.79	Male	S. paramamosain
133.37	124.17	131.77	85.32	33.79	48.01	45.04	103.29	55.9	25.22	Male	S. paramamosain
133.57	125.32	131.9	91.46	32.08	48.01	46.43	101.04	51.65	27.93	Male	S. paramamosain
133.65	123.08	132.7	90.93	31.75	44.44	48.02	96.98	55.81	27.99	Male	S. paramamosain
134.68	123.54	128.8	84.5	34.72	48.43	44.71	104.87	52.61	26.56	Male	S. paramamosain
134.87	126.66	130.96	82.05	34.5	46.08	45.44	102.26	52.66	26.63	Male	S. paramamosain
136.74	126.71	131.61	87.64	34.22	45	44.95	95.22	57.34	25.04	Male	S. paramamosain
137.08	126.48	132.13	86.77	34.65	44.98	48.02	100.64	56.8	25.67	Male	S. paramamosain
137.14	127.75	133.21	88.89	32.26	46.67	45.25	105.54	52.36	25.01	Male	S. paramamosain
137.65	129.43	134.87	82.93	35.95	43.32	46.05	100.48	50.88	27.16	Male	S. paramamosain
137.86	126.97	135.42	85.52	32.06	42.72	44.6	93.98	53.62	27.47	Male	S. paramamosain
138.46	129.95	135.95	88.07	34.86	45.45	47.08	98.37	53.9	27.02	Male	S. paramamosain
138.7	128.89	135.13	90.49	35.7	45.71	44.32	96.78	54.33	26.3	Male	S. paramamosain
138.86	130.23	136.42	82.47	33.76	43.87	48.14	101.05	57.53	28.35	Male	S. paramamosain
139.29	130.8	137.23	86.36	31.63	48.58	46.27	94.42	56.44	28.42	Male	S. paramamosain
139.35	130.21	136.06	83.35	33.05	45.8	48.56	98.14	54.56	27.42	Male	S. paramamosain
139.91	131.35	136.3	90.53	35.67	46.97	46.61	96.39	51.57	26.99	Male	S. paramamosain
140.41	131.03	137.75	92.1	36.55	47.09	47.32	108.93	56.17	29.29	Male	S. paramamosain
140.76	130.58	137.7	94.83	34.65	49.93	49.9	109.45	57.3	27.51	Male	S. paramamosain
140.93	131.3	137.77	94.32	36.17	48.28	47.14	107.16	56.6	29.07	Male	S. paramamosain
141.25	132.85	138.68	90.28	36.46	48.16	48.3	107.19	55.58	29.04	Male	S. paramamosain
141.36	130.23	139.22	90.43	35.8	48.25	49.34	108.66	56.46	27.94	Male	S. paramamosain
141.8	131.07	138.88	95.35	34.82	48.35	48.64	107.82	55.6	28.93	Male	S. paramamosain
143.26	132.03	140.71	89.61	36.69	47.27	48.27	104.49	57.86	28.89	Male	S. paramamosain
143.35	133.32	140.81	93.79	34.58	48.91	48.02	102.72	57.94	29.33	Male	S. paramamosain
144.01	135.38	141.99	95.42	36.25	48.01	47.94	104.87	58.77	29.25	Male	S. paramamosain
144.29	135.38	141.02	89.97	35.18	49.22	50.36	107.34	55.48	27.78	Male	S. paramamosain
144.32	132.38	140.52	89.27	35.24	49.94	49.6	107.6	55.54	27.7	Male	S. paramamosain
98.06	92.02	96.34	64.98	23.93	36.35	29.17	81.19	39.63	17.52	Male	S. tranquebarica
98.08	91.66	97.02	62.8	22.84	35.84	28.9	79.12	37.79	18.97	Male	S. tranquebarica
98.24	92.91	96.16	73.03	23.42	36.54	28.72	81.63	40.18	19.78	Male	S. tranquebarica
98.49	92.89	97.06	65.23	22.97	35.13	32.01	75.41	40.23	18.94	Male	S. tranquebarica
98.57	93.3	97.66	65.18	23.13	34.14	29.19	81.18	41.83	18.29	Male	S. tranquebarica
98.67	93.21	96.79	67.08	23.53	37.18	30.52	74.24	42	20.02	Male	S. tranquebarica
99.09	92.32	97.44	65.45	23.75	33.06	32.58	83.47	39.62	17.95	Male	S. tranquebarica
99.17	93.62	97.93	74.02	23.07	33.24	28.47	76.22	37.78	17.58	Male	S. tranquebarica
99.5	93.16	97.96	64.82	23.19	32.73	31.19	79.93	42.37	18.29	Male	S. tranquebarica
99.53	94.71	98.37	66.43	22.98	36.69	30.38	86	44.49	17.88	Male	S. tranquebarica
99.54	92.69	97.47	74.05	24.22	35.23	31.66	73.73	42.87	17.9	Male	S. tranquebarica
99.54	94.71	98.7	66.46	23.07	37.91	28.76	81.26	41.75	18.37	Male	S. tranquebarica
99.55	94.69	98.38	63.28	23.71	34.24	28.32	84	42.21	19.81	Male	S. tranquebarica
99.55	94.64	98.12	73.31	24.16	36.46	32.38	80.48	42.67	17.74	Male	S. tranquebarica
99.61	94.66	98.32	70.31	23.94	34.52	29.77	82.43	40.52	19.75	Male	S. tranquebarica
99.63	94.55	98.25	62.65	24.37	34.54	29.01	84.32	43.44	18.23	Male	S. tranquebarica
99.9	94.09	97.96	69.68	24.28	34.12	30.01	77.91	43.21	20.12	Male	S. tranquebarica
99.9	94.08	98.53	70.99	24.4	32.81	28.28	83.85	37.53	20.27	Male	S. tranquebarica
100	93.68	98.72	68.76	24.05	37.15	30.8	78.07	44.48	17.76	Male	S. tranquebarica
100.04	94.06	98.82	67.36	24.74	34.58	33.24	74.85	38.31	20.46	Male	S. tranquebarica
100.22	93.61	99.02	69.65	25.03	33.88	30.43	82.64	43.26	20.06	Male	S. tranquebarica
100.55	94.31	98.98	73.97	23.8	36.43	32.36	78.46	38.75	19.97	Male	S. tranquebarica
100.66	95.83	99.13	70	23.26	37.6	33.13	84.06	44.58	18.79	Male	S. tranquebarica
100.72	95.98	99.89	63.97	24.3	36.92	32.12	79.87	40.17	19.21	Male	S. tranquebarica
100.74	94.6	99.33	69.76	24.64	34.68	33.19	79.42	37.54	18.76	Male	S. tranquebarica
100.88	95.49	98.98	70.47	25.07	37.52	31.75	82.96	42.5	19.63	Male	S. tranquebarica
100.88	95.78	99.1	64.66	23.3	35.78	28.44	80.26	43.53	19.38	Male	S. tranquebarica
100.89	94.17	98.87	70.99	24.46	32.88	29.07	73.32	41.36	18.37	Male	S. tranquebarica
101.01	95.63	99.72	71.64	23.72	35.58	29.99	73.51	40.54	18.91	Male	S. tranquebarica
101.1	94.62	99.3	65.66	24.65	32.24	33.39	76.61	39.31	19.53	Male	S. tranquebarica
101.11	96.19	99.13	63.5	24.87	34.23	33.31	78.86	42.72	19.54	Male	S. tranquebarica
101.22	94.42	100.1	74.16	23.48	35.24	29.73	73.02	40.95	18	Male	S. tranquebarica
101.29	95.77	99.98	65.64	24.22	34.65	30.7	73.63	44.02	19.38	Male	S. tranquebarica
101.34	96.34	99.73	64.31	24.7	35.36	29.02	85.49	41.21	19.69	Male	S. tranquebarica
101.37	95.32	99.29	69.73	24.54	34.45	29.17	77.53	42.41	19.3	Male	S. tranquebarica
101.39	96.13	100.24	62.11	23.49	32.77	32.37	78.17	44.52	18.45	Male	S. tranquebarica
101.46	95.83	99.47	66	23.69	36.01	31.02	83.67	38.96	17.86	Male	S. tranquebarica
101.5	95.29	99.48	63.43	25.13	33.51	31.21	80.62	43.91	17.48	Male	S. tranquebarica
101.53	96.83	99.82	65.59	24.84	35.67	30.84	74.28	40.95	18.76	Male	S. tranquebarica
101.57	94.73	99.67	70.34	24.36	33.94	30.07	75.26	44.48	17.39	Male	S. tranquebarica
101.87	95.02	99.78	66.86	24.92	36.18	29.65	72.78	44.67	19.06	Male	S. tranquebarica
101.93	95.68	99.98	72.18	24.08	36.9	28.55	80.17	41.98	17.78	Male	S. tranquebarica
102.33	95.63	101.53	62.37	24.43	33.32	28.47	77.13	38.41	19.28	Male	S. tranquebarica
102.46	95.72	100.52	70.74	23.64	37.13	31.81	78.57	43.71	18.23	Male	S. tranquebarica
102.52	95.04	101.25	71.53	23.86	34.68	31.75	78.53	41.41	18.63	Male	S. tranquebarica
102.67	95.68	101.76	63.2	25.1	34.33	30.96	79.99	44.47	19.93	Male	S. tranquebarica
102.97	96.43	101.7	64.35	24.66	33.68	32.33	77.09	44.18	20.58	Male	S. tranquebarica
103.18	96.29	101.1	62.98	24.02	33.3	30.75	74.84	42.08	18.8	Male	S. tranquebarica
103.22	95.62	101.43	69.48	24.21	36.43	29.32	74.51	40.75	19.4	Male	S. tranquebarica
103.27	96.3	101.74	74.21	25.1	38.22	32.53	84.06	39.44	19.25	Male	S. tranquebarica
103.45	96.97	102.55	63.3	25.58	37.54	31.2	84.86	38.16	17.42	Male	S. tranquebarica
103.51	96.96	101.92	73.57	25.83	32.16	30.81	85.54	40.66	19.38	Male	S. tranquebarica
103.55	96.92	101.5	62.82	23.91	35.98	29.49	82.46	41.29	17.62	Male	S. tranquebarica
103.65	97.41	102.66	66.11	24.84	33.85	31.57	80.38	43.68	17.49	Male	S. tranquebarica
103.69	97.34	102.25	65.15	24.51	34.45	29.77	79.35	42.14	19.19	Male	S. tranquebarica
103.92	97.45	102.2	66.5	24.69	35.76	30.02	78.08	42.38	18.96	Male	S. tranquebarica
104.03	96.59	102.8	65.73	25.77	33.68	32.21	74.71	44.61	19.04	Male	S. tranquebarica
104.12	98.05	102.22	69.42	24.81	32.22	28.76	85.71	44.88	17.59	Male	S. tranquebarica
104.23	96.54	102.21	67.44	24.23	33.75	28.16	81.9	43.55	20.14	Male	S. tranquebarica
104.23	97.02	102.75	68.5	25.71	38.34	33.57	77.38	43.99	19.47	Male	S. tranquebarica
104.32	98.5	102.87	68.25	26.75	35.57	28.43	75.65	42.52	19.35	Male	S. tranquebarica
104.44	96.67	102.57	63.27	25.28	35.37	32.73	76.05	40.65	18.14	Male	S. tranquebarica
104.66	97.79	103.83	71.8	25.26	38.31	28.16	74.82	43.86	20.23	Male	S. tranquebarica
104.83	97.58	103.68	65.06	25.18	37.65	33.6	82.15	42.4	18.56	Male	S. tranquebarica
104.91	97.17	103.04	65.05	26.33	33.88	30.48	81.08	41.15	17.43	Male	S. tranquebarica
105.01	98.5	103.03	72.04	26.73	36.43	31.42	79.39	38.9	18.8	Male	S. tranquebarica
105.24	99.23	103.75	70.79	25.68	37.48	32.08	74.3	42.74	17.89	Male	S. tranquebarica
105.33	98.25	104.23	69.88	24.85	33.69	30.41	81.79	39.15	18.9	Male	S. tranquebarica
105.42	98.14	103.6	67.53	24.4	32.22	29.83	72.32	39.43	20.23	Male	S. tranquebarica
105.54	98.71	103.91	66.7	25.7	33.02	28.77	78.19	39.66	19.51	Male	S. tranquebarica
105.71	98.17	104.47	70.26	26.9	34.1	32.12	78.55	39.26	17.92	Male	S. tranquebarica
105.79	99.1	104.98	67.36	25.76	36.17	30.36	74.5	41.47	19.76	Male	S. tranquebarica
105.82	99.01	104.33	72.13	26.71	37.3	29.53	86.1	40.37	17.59	Male	S. tranquebarica
105.87	99.43	104.97	63.44	27.21	33.94	29.13	80.62	38.39	20.16	Male	S. tranquebarica
106.22	100.39	105.1	67.05	25.1	36.25	30.02	75.31	39.55	17.77	Male	S. tranquebarica
106.23	98.67	104.29	72.72	26.45	34.22	28.95	85.4	43.38	19.35	Male	S. tranquebarica
106.4	100.34	104.5	64.05	25.79	32.55	30.31	79.01	39.66	19.27	Male	S. tranquebarica
106.57	99.08	105.26	72.2	25.03	33.85	29.56	78.43	43.03	18.12	Male	S. tranquebarica
106.59	100.33	105.03	63.97	27.33	37.14	32.35	80.06	39.04	18.97	Male	S. tranquebarica
106.61	99.81	105.03	62.66	25.4	36.91	30	76.81	42.22	17.84	Male	S. tranquebarica
106.64	98.72	104.95	69.31	25.08	38.18	31.34	75.07	43.58	18.33	Male	S. tranquebarica
106.65	98.86	105.59	70.29	26.3	32.6	32.26	72.72	41.99	18.12	Male	S. tranquebarica
106.78	98.14	105.5	69.99	25.93	33.19	28.5	78.51	42.52	20.26	Male	S. tranquebarica
106.83	100.15	104.93	70.37	24.61	35.36	31.69	74.3	42.11	20.23	Male	S. tranquebarica
106.88	99.82	106.07	66.7	27.41	38.15	28.56	80.77	43.88	19.48	Male	S. tranquebarica
106.94	98.83	105.46	65.88	27.25	35.17	28.6	73.58	44.02	20.38	Male	S. tranquebarica
107	98.39	105.56	64.8	27.2	32.28	28.19	82.64	40.77	19.59	Male	S. tranquebarica
107.52	100.04	106.43	72.48	25.03	33.38	31.98	81.06	40.28	20.31	Male	S. tranquebarica
107.73	99.3	105.8	70.69	25.26	32.68	33.71	74.99	43.55	17.34	Male	S. tranquebarica
107.8	99.14	106.3	71.94	26.64	38.21	29.53	73.34	42.01	18.3	Male	S. tranquebarica
107.87	100.46	105.97	72.24	27.76	32.47	31.92	74.21	43.95	19.67	Male	S. tranquebarica
108.04	99.22	106.09	73.84	27.03	36.12	31.93	83.66	39.96	19.31	Male	S. tranquebarica
108.08	99.9	106.46	62.84	27.54	36.89	30.86	75.14	42.03	18.63	Male	S. tranquebarica
108.23	100.06	106.59	72.25	26.4	35.95	31.16	84.27	40.5	19.07	Male	S. tranquebarica
108.43	100.51	106.7	63.57	27.1	37.19	33.41	73.3	38.65	19.37	Male	S. tranquebarica
108.48	100.87	106.47	67.97	27.25	32.4	28.66	81.77	38.98	17.99	Male	S. tranquebarica
108.54	100.16	107.17	72.06	25.63	34.69	28.17	78.35	37.67	19.52	Male	S. tranquebarica
108.65	100.64	107.21	65.46	26.62	34.62	29.08	76.43	38.24	17.87	Male	S. tranquebarica
108.66	101.5	106.66	70.77	25.43	38.03	32.61	74.82	41.02	19.83	Male	S. tranquebarica
108.76	100.15	107.36	68.85	27.5	36.51	33.35	77.41	43.07	19.95	Male	S. tranquebarica
108.83	101.51	108.02	70.15	27.14	37.65	29.33	81.75	42.19	17.7	Male	S. tranquebarica
108.84	102.02	107.52	72.88	27.54	37.97	32.89	75.99	42.49	18.65	Male	S. tranquebarica
108.87	102.28	107.26	72.75	26.97	33.74	31.57	76.98	40.53	18.26	Male	S. tranquebarica
109.33	101.19	108.47	73.96	27.32	35.19	29.55	77.81	41.19	19.61	Male	S. tranquebarica
109.41	100.86	107.59	69.64	27.92	33.33	29.74	80.13	37.93	18.42	Male	S. tranquebarica
109.6	102.24	108.05	64.22	28.07	37.15	31.23	79.69	43.7	20.62	Male	S. tranquebarica
109.81	102.14	108.65	69.06	25.38	35.4	30.5	80.41	40.15	18.78	Male	S. tranquebarica
109.96	101.37	108.41	70.16	26.08	32.14	28.58	76.85	43.12	20.22	Male	S. tranquebarica
109.99	101.75	108.12	71.29	26.77	35.93	32.51	80.38	40.41	18.77	Male	S. tranquebarica
110.09	102.91	108.51	75.26	27.36	40.2	35.27	81.15	46.44	20.25	Male	S. tranquebarica
110.14	102.5	109.32	80.13	25.72	38.97	31.56	83.36	46.85	20.38	Male	S. tranquebarica
110.24	102.35	108.99	77.58	25.59	40.86	35.17	89.43	47.06	20.95	Male	S. tranquebarica
110.71	102.03	108.82	75.27	26.41	41.09	35.64	93.1	47.68	22.41	Male	S. tranquebarica
110.77	103.42	109.31	71.3	25.58	38.65	31.46	91.1	45.62	19.32	Male	S. tranquebarica
110.94	102.7	109.19	76.75	28.6	38.91	34.32	85.44	45.4	22.38	Male	S. tranquebarica
110.94	102.77	109.89	79.07	27.3	41.69	32.64	88.71	44.75	22.02	Male	S. tranquebarica
111.07	103.28	109.76	79.01	28.4	39.06	35.03	82.11	44.78	21.76	Male	S. tranquebarica
111.31	104.59	109.24	72.07	26.54	37.93	32.4	85.4	47.08	21.53	Male	S. tranquebarica
111.55	104.04	110.54	72.24	27.82	41.73	36.46	85.83	46.03	20.63	Male	S. tranquebarica
111.77	103.99	110.16	72.13	25.87	36.28	33.15	93.38	41.9	21.06	Male	S. tranquebarica
111.91	104.13	109.82	72.45	26.96	40.14	35.27	82.84	47.77	20.04	Male	S. tranquebarica
111.97	103.74	110.67	74.77	27.97	36.44	35.87	90.07	45.6	20.83	Male	S. tranquebarica
112.05	103.43	111.13	77.32	27.48	38.72	36.08	87.79	47.39	21.55	Male	S. tranquebarica
112.05	104.61	110.04	72.76	28.43	41.48	33.34	84.05	47.89	21.03	Male	S. tranquebarica
112.24	105.15	111.17	75.85	29.05	36.12	33.09	82.08	45.83	20.59	Male	S. tranquebarica
112.4	104.01	110.35	75.25	26.45	41.15	32.94	88.06	46.92	21.96	Male	S. tranquebarica
112.49	105.61	111.12	77.02	25.99	38.89	31.97	89.13	42.6	19.79	Male	S. tranquebarica
112.49	105.45	111.26	75.97	28.57	38.02	35.35	93.73	46.55	21.27	Male	S. tranquebarica
112.52	105.83	110.66	75.75	27.52	39.94	32.83	89.06	42.37	19.97	Male	S. tranquebarica
112.53	104.09	110.52	75.3	28.75	38.28	32.35	88.53	43.98	21.4	Male	S. tranquebarica
112.89	104.82	111.61	72.84	26.07	39.75	32.24	83.85	44.73	21.28	Male	S. tranquebarica
112.99	105.87	112.09	74.69	28.54	37.34	34.28	87.9	42.8	21.18	Male	S. tranquebarica
113.01	106.25	111.03	78.79	27.16	38.35	33.95	83.01	45.4	21.44	Male	S. tranquebarica
113.06	104.47	111.46	78.29	27.07	36.13	32.2	88.01	42.42	20.77	Male	S. tranquebarica
113.12	104.78	111.77	78.4	27.06	40.01	36.44	90.94	41.95	20.97	Male	S. tranquebarica
113.13	105.18	111.57	78.7	27.06	40.27	32.02	87.79	45.87	20.62	Male	S. tranquebarica
113.21	106.05	111.68	73.15	28.7	35.79	33.76	85.58	43.9	20.72	Male	S. tranquebarica
113.33	104.68	111.79	75.36	28.91	37.82	35.32	91.03	45.66	20.34	Male	S. tranquebarica
113.46	106.59	112.27	78.91	28.03	37.8	33.49	93.02	46.64	20.79	Male	S. tranquebarica
113.48	106.65	111.82	76.54	27.09	37.86	34.23	84.58	43.44	21.36	Male	S. tranquebarica
113.56	106.82	111.7	79.57	27.13	38.32	32.07	82.6	45.29	20.07	Male	S. tranquebarica
113.57	104.9	112.58	71.76	27.2	35.91	32.67	86.81	45.16	22.34	Male	S. tranquebarica
113.57	106.31	112.1	80.77	27.81	38.4	36.02	81.65	45.9	19.85	Male	S. tranquebarica
113.69	107.08	112.48	70.36	28.42	37.27	35.31	80.76	47.87	19.4	Male	S. tranquebarica
113.93	107.01	111.85	78.75	27.36	38.15	34.54	84.63	43.85	20.57	Male	S. tranquebarica
114.03	105.97	112.59	78.78	27.5	35.98	35.97	91.02	45.1	21.54	Male	S. tranquebarica
114.05	105.66	112.62	79.73	27.67	40.76	33.58	89.67	42.6	22.01	Male	S. tranquebarica
114.12	106.09	112.77	71.65	28.04	40.54	34.48	88.94	42.01	20.8	Male	S. tranquebarica
114.3	106.26	113.09	79.97	26.64	36.57	35.03	85.14	45.68	21.08	Male	S. tranquebarica
114.42	107.51	112.71	72.72	26.7	36.54	36.24	82.86	41.87	21.74	Male	S. tranquebarica
114.43	107.32	112.87	79	28.43	38.25	33.48	87.34	45.2	21.58	Male	S. tranquebarica
114.43	105.87	113.48	73.31	26.42	41.09	31.98	87.09	45.69	20.09	Male	S. tranquebarica
114.55	106.21	113.57	72.34	28.28	36.83	32.59	80.46	41.89	20.04	Male	S. tranquebarica
114.69	106.73	113.24	73.44	28.74	38.39	32.78	92.77	47.45	21.07	Male	S. tranquebarica
114.75	107.88	113.17	80.26	28.61	40.53	34.55	85.26	42.82	20.67	Male	S. tranquebarica
114.83	106.84	113.11	80.23	28.45	36.85	31.82	92.74	46.49	21.78	Male	S. tranquebarica
115.25	107.39	114.1	72.09	28.2	36.73	31.84	91.19	42.8	20.75	Male	S. tranquebarica
115.31	107.64	113.31	76.36	27.23	37.5	32.06	82.77	42.96	22.44	Male	S. tranquebarica
115.48	108.71	114.31	69.65	29.12	39.44	33.22	80.52	48.71	19.74	Male	S. tranquebarica
115.49	107.31	113.48	77.08	27.18	40.15	32.72	85.45	42.65	21.36	Male	S. tranquebarica
115.83	107.21	114.88	74	29.06	36.44	31.67	83.77	43.69	19.33	Male	S. tranquebarica
116.05	107.9	114.3	71.18	27.07	39.01	34.53	83.67	42.84	21.52	Male	S. tranquebarica
116.22	109.14	114.89	74.8	29.15	36.08	36.2	89.78	46.52	19.98	Male	S. tranquebarica
116.33	107.83	114.75	79.07	26.88	36.87	32.82	88.63	43.17	19.63	Male	S. tranquebarica
116.44	109.33	115.41	70.82	27.4	40.29	33.06	83.75	47.79	21.6	Male	S. tranquebarica
116.46	108.51	115.29	73.32	28.91	41.53	34.67	92.21	44.65	21.2	Male	S. tranquebarica
116.68	109.94	115.6	75.93	27.6	41.39	32.21	93.59	46.7	21.83	Male	S. tranquebarica
116.68	108.19	115.03	72.03	29.39	40.31	33.42	88.4	47.45	22.48	Male	S. tranquebarica
116.79	109.06	115.14	76.3	28.35	41.26	31.81	88.58	46.61	22.42	Male	S. tranquebarica
116.95	108.2	115.13	76.27	27.88	40.68	32.49	86.05	45.12	20.67	Male	S. tranquebarica
117.05	109.49	115.65	74.37	27.71	37.96	34.97	93.51	42.44	20.23	Male	S. tranquebarica
117.25	108.48	115.37	77.11	29.81	37.33	36.04	88.43	47.34	21.52	Male	S. tranquebarica
117.31	108.8	116.3	79.68	28.97	36.33	33.22	93	46.68	22.06	Male	S. tranquebarica
117.32	109.7	115.67	71.42	28.32	39.24	33.06	82.57	44.37	20.72	Male	S. tranquebarica
117.37	109.86	115.5	71.8	27.1	39.35	36.2	82.07	42.94	19.9	Male	S. tranquebarica
117.46	108.64	116.03	77.04	30.36	38.95	33.72	80.47	46.67	20.31	Male	S. tranquebarica
117.6	110.02	115.86	76.77	29.24	36.8	35.7	90.28	46.79	20.75	Male	S. tranquebarica
117.69	108.98	116.23	77.37	27.16	38.69	33.32	82.18	47.18	20.3	Male	S. tranquebarica
118.04	109.18	116.71	71.43	30.54	37.35	36.64	90.89	41.82	21.81	Male	S. tranquebarica
118.07	109.3	116.83	76	30.4	39.52	34.98	84.3	42.71	20.25	Male	S. tranquebarica
118.08	109.9	116.07	74.75	29.07	38.92	35.63	81.72	43.08	21.31	Male	S. tranquebarica
118.36	109.9	116.34	69.43	30.03	37.73	32.6	93.86	48.7	21.5	Male	S. tranquebarica
118.48	110.07	116.49	72.15	28.08	36.6	34.89	81.5	45.7	20.89	Male	S. tranquebarica
118.54	110.32	117.48	77.84	28	40.39	35.02	81.12	42.93	19.8	Male	S. tranquebarica
118.58	110.81	116.76	71.01	28.11	38.13	32.08	91.75	43.58	19.6	Male	S. tranquebarica
118.72	110.14	116.92	80.65	30.26	40.5	32.55	88.5	44.31	20.11	Male	S. tranquebarica
118.82	111.01	117.33	76.8	29.97	39.58	35.54	90.03	43.25	20.19	Male	S. tranquebarica
119.04	110.35	117.62	76.06	29.81	41.47	33.52	84.03	41.96	20.13	Male	S. tranquebarica
119.05	111.51	118.07	75.91	28.83	36.04	31.66	87.05	48.44	20.76	Male	S. tranquebarica
119.09	110.44	117.51	69.79	27.82	36.59	31.98	88.33	48.64	22.53	Male	S. tranquebarica
119.12	111.49	117.22	69.4	29.37	37.03	31.73	87.35	48	19.4	Male	S. tranquebarica
119.19	111	117.25	75.95	27.63	41.5	33.7	89.52	43.71	19.63	Male	S. tranquebarica
119.32	111.14	117.25	78.7	28.38	40.28	35.32	83.06	47.22	20.03	Male	S. tranquebarica
119.32	111.37	117.32	69.65	30.78	36.43	31.9	84.37	46.77	21.54	Male	S. tranquebarica
119.68	111.35	118.08	77.3	29.99	41.48	33.3	85.38	43.25	19.34	Male	S. tranquebarica
119.68	111.41	118.23	69.64	29.76	38.11	34.81	83.05	42.96	20.35	Male	S. tranquebarica
119.7	111.44	117.71	78.16	30.95	40.58	32.76	81.95	43.93	21.82	Male	S. tranquebarica
119.78	111.7	118.51	79.54	27.83	40.32	36.44	92.42	46.64	21.18	Male	S. tranquebarica
119.94	111.76	118.2	70.93	28	36.51	32.42	82.09	43.26	19.58	Male	S. tranquebarica
[truncated: 3,401 more rows]
